# Supplementary material for: The reaction of acyl cyanides with “Huisgen zwitterion”: an interesting rearrangement involving ester group migration between oxygen and nitrogen atoms
Source: Royal Society of Chemistry journal article supplement (doi:10.1039/b913196e), 2009-01-01
Supplement: b913196e.pdf [file b913196e.pdf]

# Supporting Information

## The Reaction of Acyl Cyanides with Huisgen Zwitterion: an Interesting Rearrangement involving Ester Group Migration between Oxygen and Nitrogen Atoms

Xu-guang Liu,<sup>a</sup> Yin Wei,<sup>b,\*</sup> and Min Shi<sup>a,b,\*</sup>

<sup>a</sup>*School of Chemistry & Molecular Engineering, East China University of Science and Technology, 130 Mei Long Road, Shanghai 200237 China, Fax: 86-21-64166128.*

<sup>b</sup>*State Key Laboratory of Organometallic Chemistry, Shanghai Institute of Organic Chemistry, Chinese Academy of Sciences, 354 Fenglin Road, Shanghai 200032 China.*

### CONTENTS

|                                                             |     |
|-------------------------------------------------------------|-----|
| Spectroscopic data of compounds <b>3</b> .....              | S2  |
| Spectroscopic data of compounds <b>4</b> .....              | S24 |
| Spectroscopic data of compounds <b>6</b> .....              | S39 |
| Spectroscopic data of compounds <b>7</b> and <b>8</b> ..... | S41 |
| X-ray crystal structure compound <b>3c</b> .....            | S44 |
| X-ray crystal structure compound <b>4g</b> .....            | S53 |

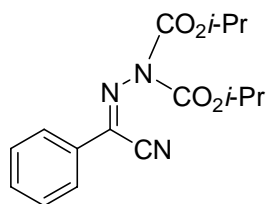

**(Z)-diisopropyl 2-(cyano(phenyl)methylene)hydrazine-1,1-dicarboxylate (3a).** Oil. IR (CH<sub>2</sub>Cl<sub>2</sub>)  $\nu$  2985, 2940, 2228, 1791, 1763, 1358, 1304, 1231, 1094, 910 cm<sup>-1</sup>; <sup>1</sup>H NMR (CDCl<sub>3</sub>, 300 MHz, TMS):  $\delta$  1.38 (12H, d,  $J$  = 6.3 Hz, CH<sub>3</sub>), 5.12-5.21 (2H, m, CH), 7.51 (2H, t,  $J$  = 6.9 Hz, Ar), 7.61 (1H, t,  $J$  = 7.8 Hz, Ar), 8.04 (2H, d,  $J$  = 7.5 Hz, Ar). <sup>13</sup>C NMR (CDCl<sub>3</sub>, 75 MHz):  $\delta$  21.6, 73.0, 109.8, 127.9, 129.1, 130.4, 133.2, 146.0, 150.4. MS (ESI)  $m/z$  318.2 (M<sup>+</sup>+1). HRMS (ESI) Calcd. for C<sub>16</sub>H<sub>19</sub>N<sub>3</sub>O<sub>4</sub> requires (M<sup>+</sup>+1) 318.1376, Found 318.14538.

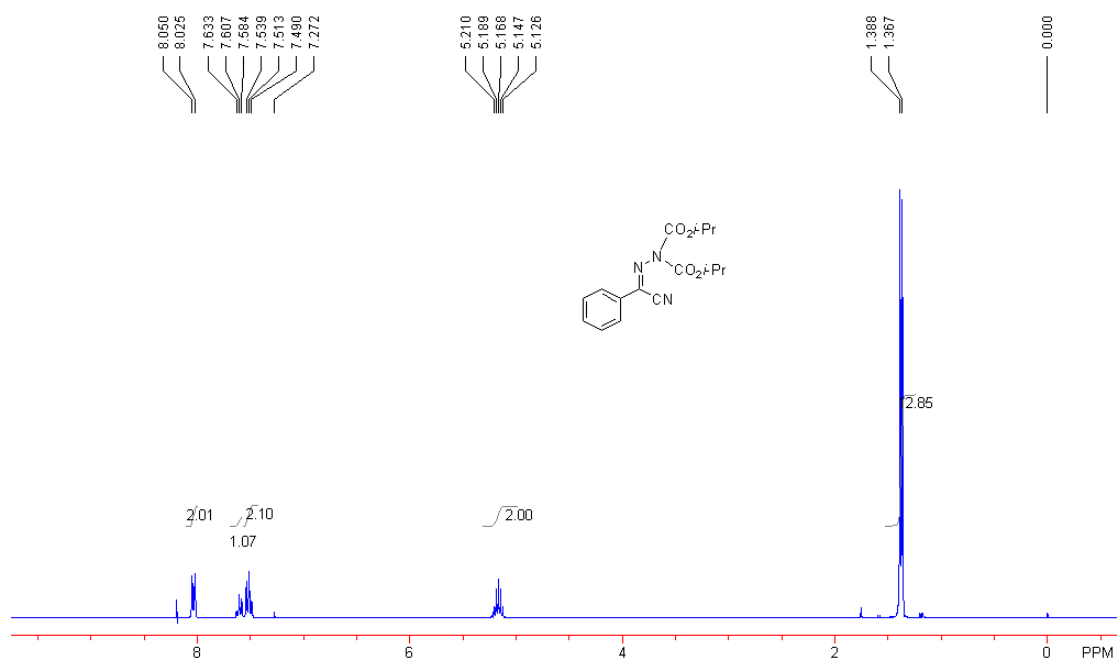

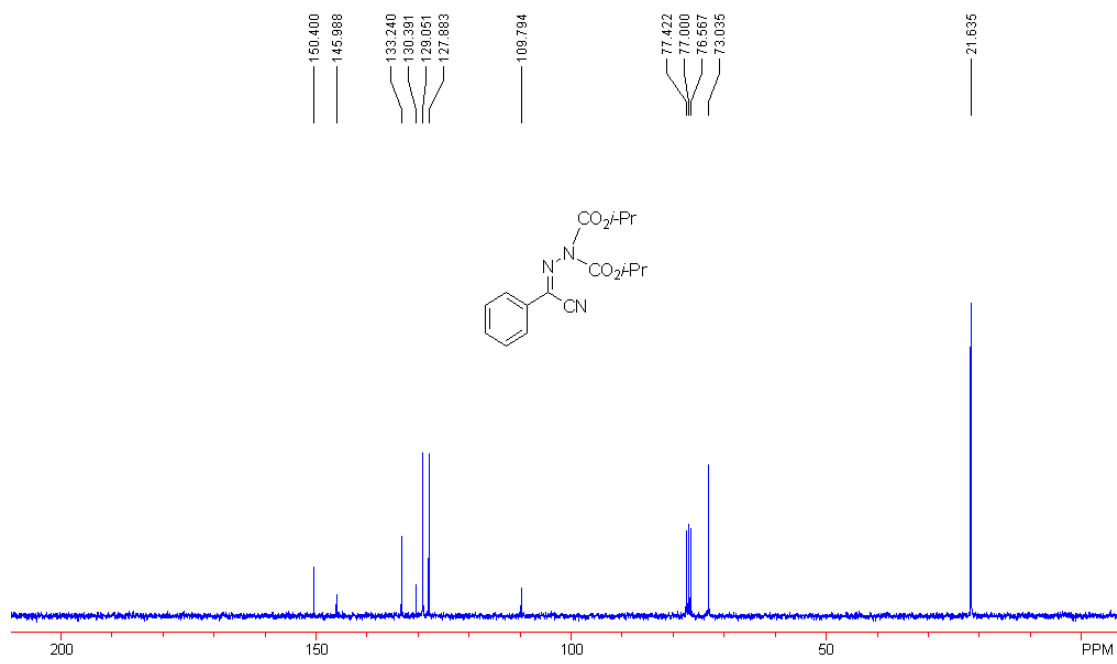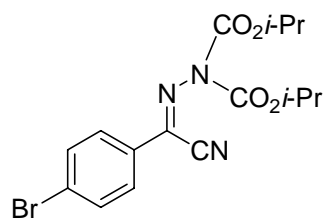

**(Z)-diisopropyl 2-((4-bromophenyl)(cyano)methylene)hydrazine-1,1-dicarboxylate (3b).**

mp. 94-96 °C; IR (CH<sub>2</sub>Cl<sub>2</sub>)  $\nu$  2985, 2938, 2228, 1798, 1764, 1376, 1300, 1094, 910 cm<sup>-1</sup>; <sup>1</sup>H NMR (CDCl<sub>3</sub>, 300 MHz, TMS):  $\delta$  1.38 (12H, d,  $J$  = 6.3 Hz, CH<sub>3</sub>), 5.13-5.22 (2H, m, CH), 7.65 (2H, d,  $J$  = 8.7 Hz, Ar), 7.89 (2H, d,  $J$  = 8.7 Hz, Ar). <sup>13</sup>C NMR (CDCl<sub>3</sub>, 75 MHz):  $\delta$  21.6, 73.3, 109.5, 128.2, 129.1, 129.4, 132.3, 143.6, 150.4. MS (EI)  $m/z$  309 (M<sup>+</sup>-86, 2.43), 269 (6.13), 267 (7.11), 223 (5.91), 195 (7.81), 114 (10.90), 44 (5.86), 43 (100.00), 41 (17.73). Anal. Calcd for C<sub>16</sub>H<sub>18</sub>BrN<sub>3</sub>O<sub>4</sub> (%) (395.05): C, 48.50; H, 4.58; Br, 20.17; N, 10.60; O, 16.15 Found: C, 48.39; H, 4.57; N, 10.58.

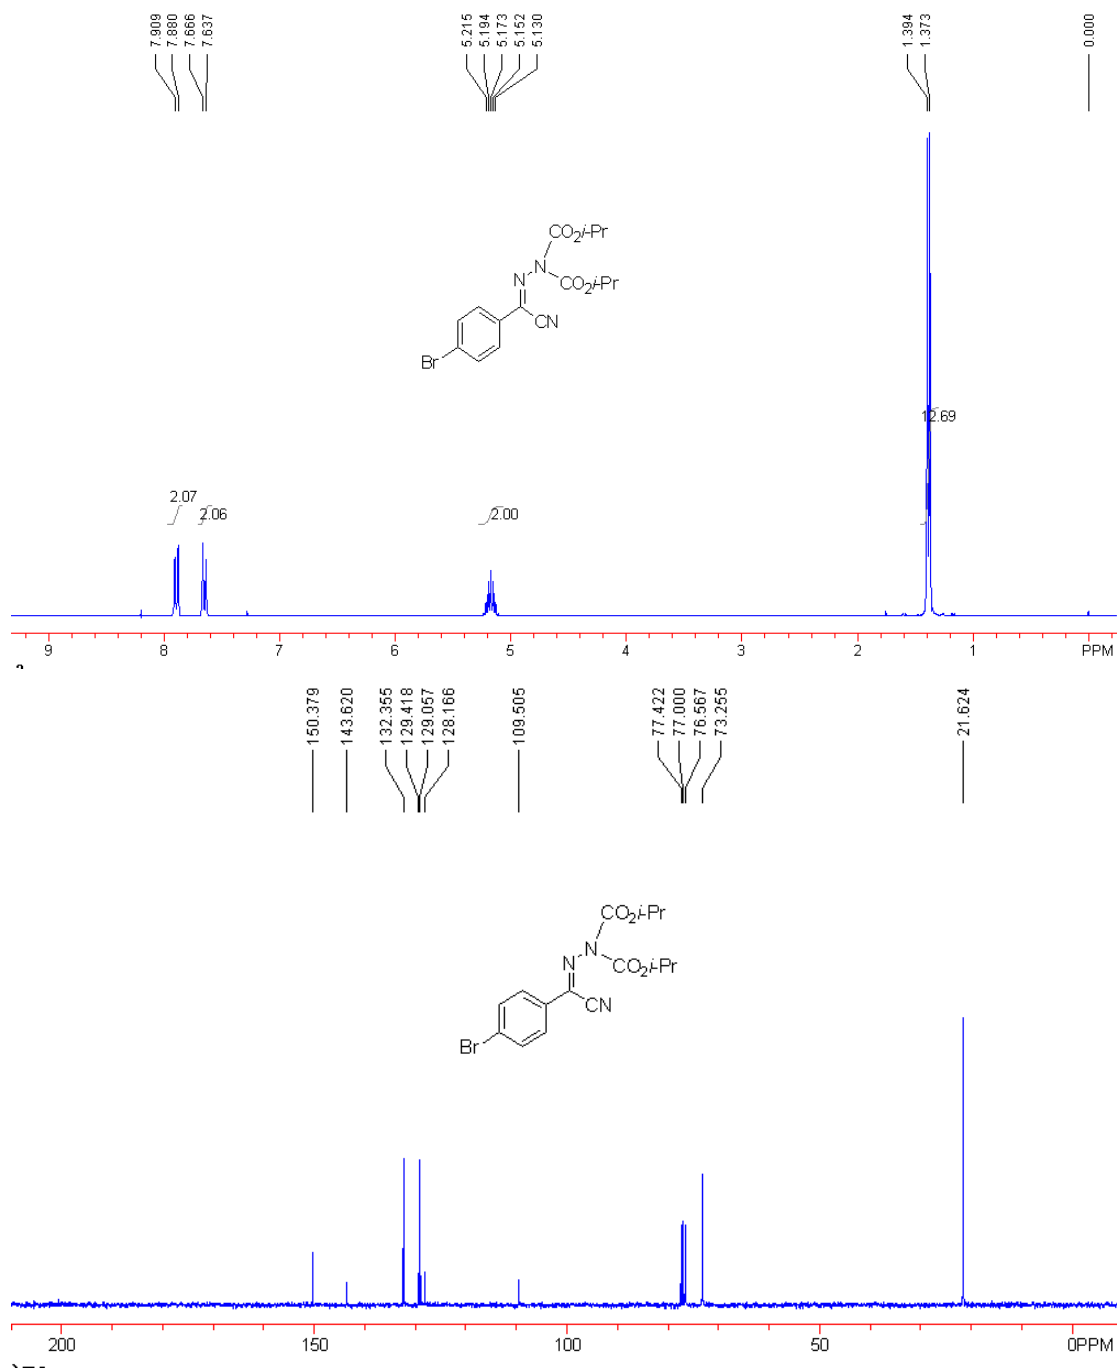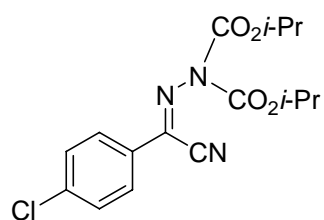

**(Z)-diisopropyl 2-((4-chlorophenyl)(cyano)methylene)hydrazine-1,1-dicarboxylate (3c).**

mp. 81-83 °C; IR (CH<sub>2</sub>Cl<sub>2</sub>) ν 2985, 2939, 2228, 1798, 1764, 1300, 1094, 837 cm<sup>-1</sup>; <sup>1</sup>H NMR

(CDCl<sub>3</sub>, 300 MHz, TMS):  $\delta$  1.38 (12H, d,  $J = 6.3$  Hz, CH<sub>3</sub>), 5.12-5.22 (2H, m, CH), 7.49 (2H, d,  $J = 8.4$  Hz, Ar), 7.97 (2H, d,  $J = 8.4$  Hz, Ar). <sup>13</sup>C NMR (CDCl<sub>3</sub>, 75 MHz):  $\delta$  21.6, 73.3, 109.6, 129.0, 129.4, 139.6, 143.7, 150.4. MS (EI)  $m/z$ . 265 (M<sup>+</sup>-86, 3.49), 223 (9.16), 179 (7.16), 151 (8.82), 43 (100.00), 42 (4.60). Anal. Calcd for C<sub>16</sub>H<sub>18</sub>ClN<sub>3</sub>O<sub>4</sub> (%) (351.09): C, 54.63; H, 5.16; Cl, 10.08; N, 11.94; O, 18.19 Found: C, 54.73; H, 5.28; N, 12.01.

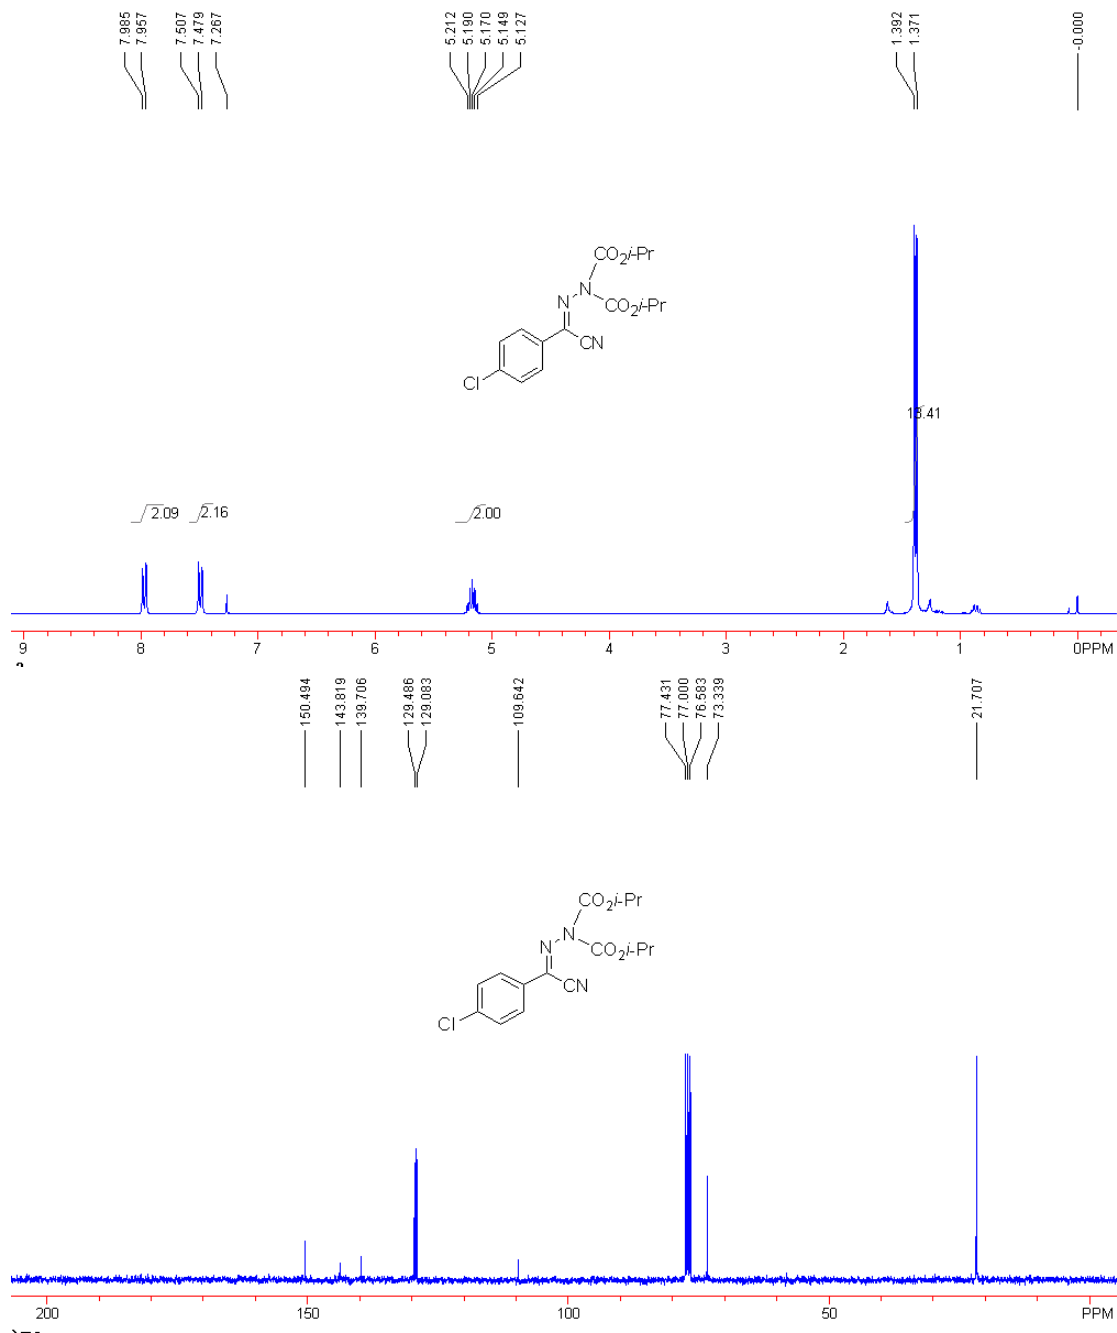

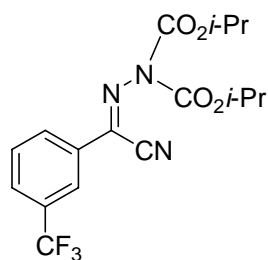

**(Z)-diisopropyl**

**2-(cyano(3-(trifluoromethyl)phenyl)methylene)hydrazine-1,1-dicarboxylate (3d).** Oil. IR (CH<sub>2</sub>Cl<sub>2</sub>)  $\nu$  2987, 2941, 2228, 1799, 1767, 1377, 1232, 1097 cm<sup>-1</sup>; <sup>1</sup>H NMR (CDCl<sub>3</sub>, 300 MHz, TMS):  $\delta$  1.41 (12H, d,  $J$  = 6.6 Hz, CH<sub>3</sub>), 5.15-5.24 (2H, m, CH), 7.68 (1H, dd,  $J_1$  = 7.8 Hz,  $J_2$  = 8.1 Hz, Ar), 7.85 (1H, d,  $J$  = 7.8 Hz, Ar), 8.20 (1H, d,  $J$  = 8.1 Hz, Ar), 8.29 (1H, s, Ar). <sup>19</sup>F NMR (CDCl<sub>3</sub>, 282 MHz):  $\delta$  -68.6. <sup>13</sup>C NMR (CDCl<sub>3</sub>, 75 MHz):  $\delta$  21.6, 73.6, 109.4, 123.3 (q,  $J$  = 271.4 Hz), 124.2 (q,  $J$  = 3.7 Hz), 129.6 (q,  $J$  = 3.2 Hz), 129.8, 130.9, 131.4, 131.7 (q,  $J$  = 33.2 Hz), 141.8, 150.4. MS (ESI)  $m/z$  386.2 (M<sup>+</sup>+1). HRMS (ESI) Calcd. for C<sub>17</sub>H<sub>18</sub>F<sub>3</sub>N<sub>3</sub>O<sub>4</sub> requires (M<sup>+</sup>+1) 386.1249 Found 386.13197.

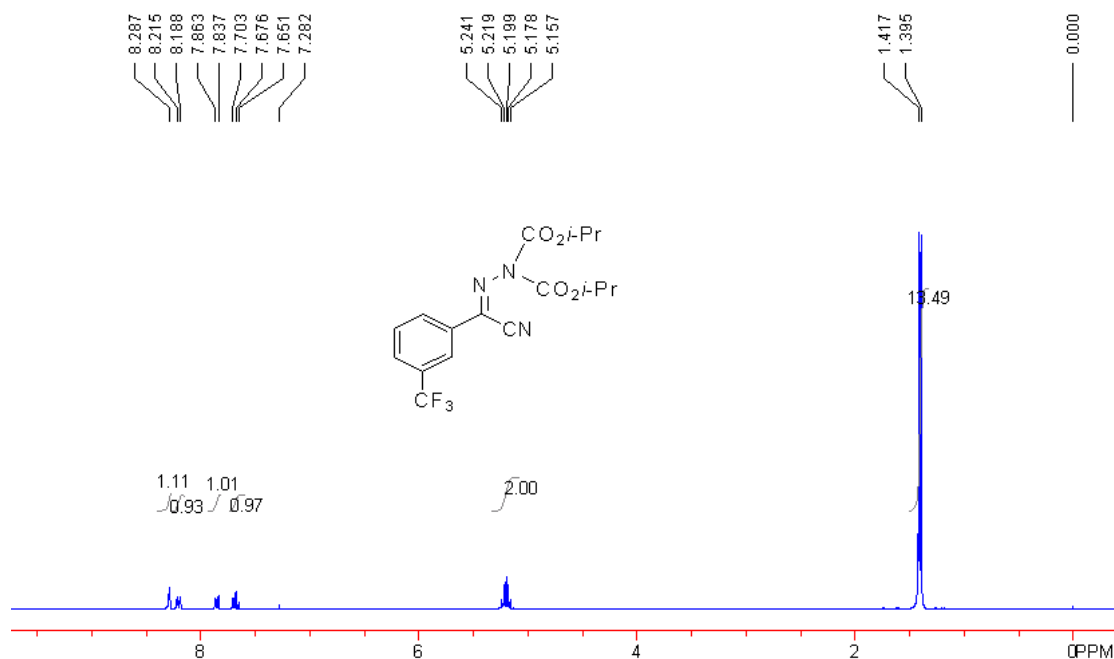

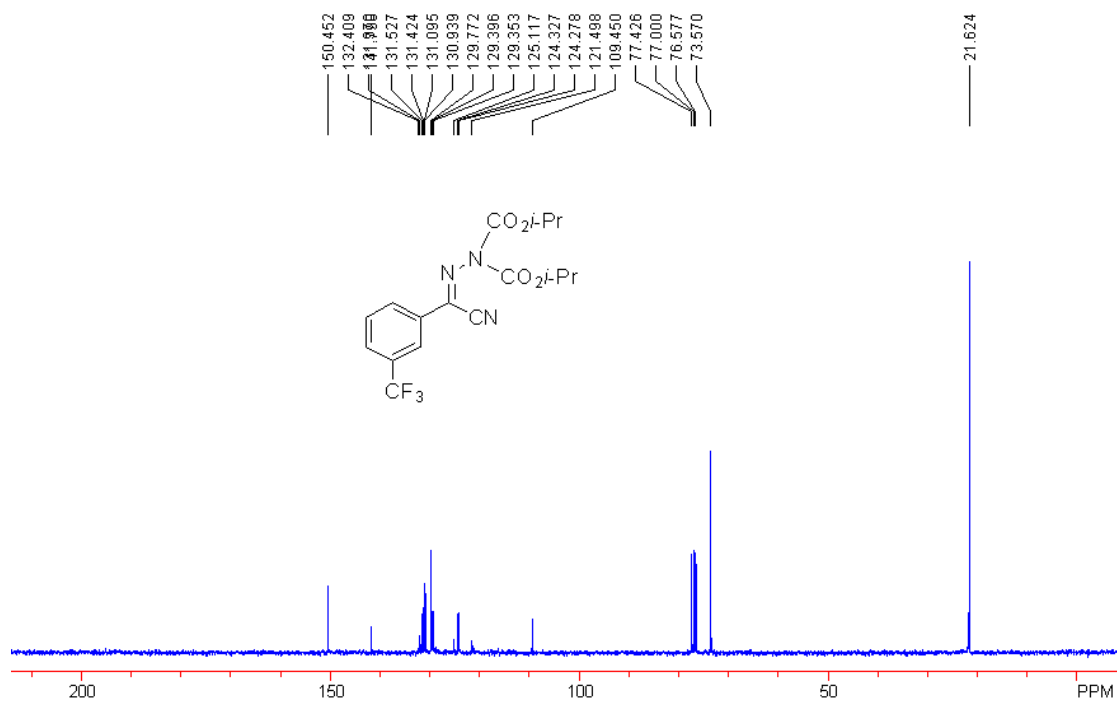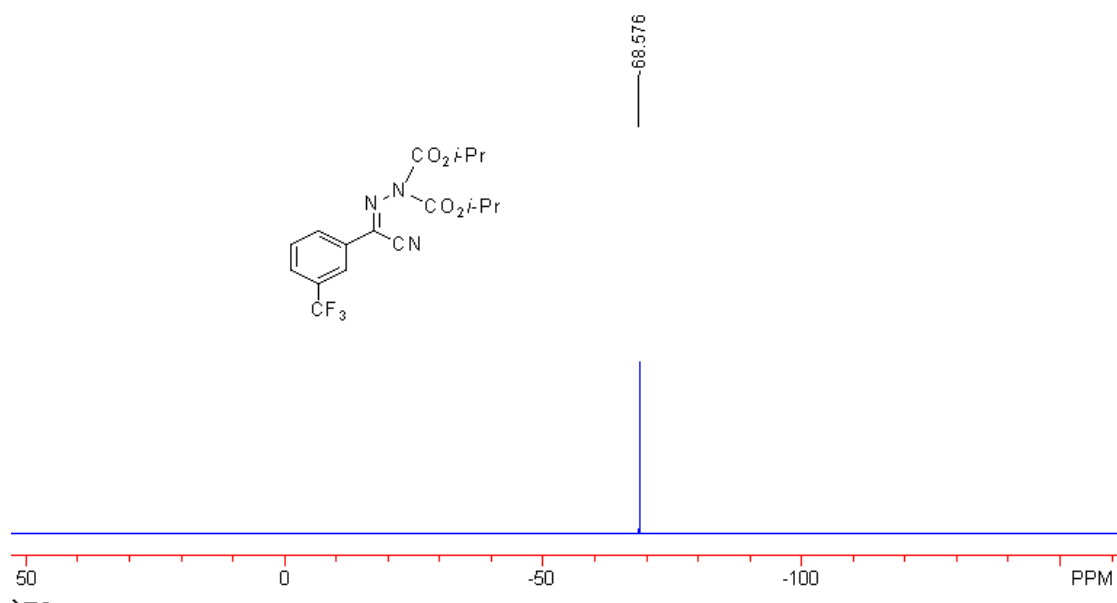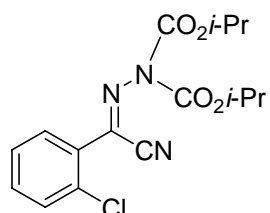

**(Z)-diisopropyl 2-((2-chlorophenyl)(cyano)methylene)hydrazine-1,1-dicarboxylate (3e).**

Oil. IR (CH<sub>2</sub>Cl<sub>2</sub>)  $\nu$  2986, 2939, 2225, 1799, 1766, 1590, 1377, 1311, 1093 cm<sup>-1</sup>; <sup>1</sup>H NMR

(CDCl<sub>3</sub>, 400 MHz, TMS):  $\delta$  1.40 (12H, d,  $J$  = 6.4 Hz, CH<sub>3</sub>), 5.15-5.22 (2H, m, CH), 7.39-7.43 (1H, m, Ar), 7.50-7.52 (2H, m, Ar), 7.70 (1H, d,  $J$  = 7.6 Hz, Ar). <sup>13</sup>C NMR (CDCl<sub>3</sub>, 100 MHz):  $\delta$  21.6, 73.2, 109.6, 127.4, 129.9, 130.7, 131.4, 133.1, 133.4, 144.0, 149.9. MS (ESI)  $m/z$  352.2 (M<sup>+</sup>+1). HRMS (ESI) Calcd. for C<sub>16</sub>H<sub>18</sub>ClN<sub>3</sub>O<sub>4</sub> requires (M<sup>+</sup>+1) 352.0986 Found 352.10558.

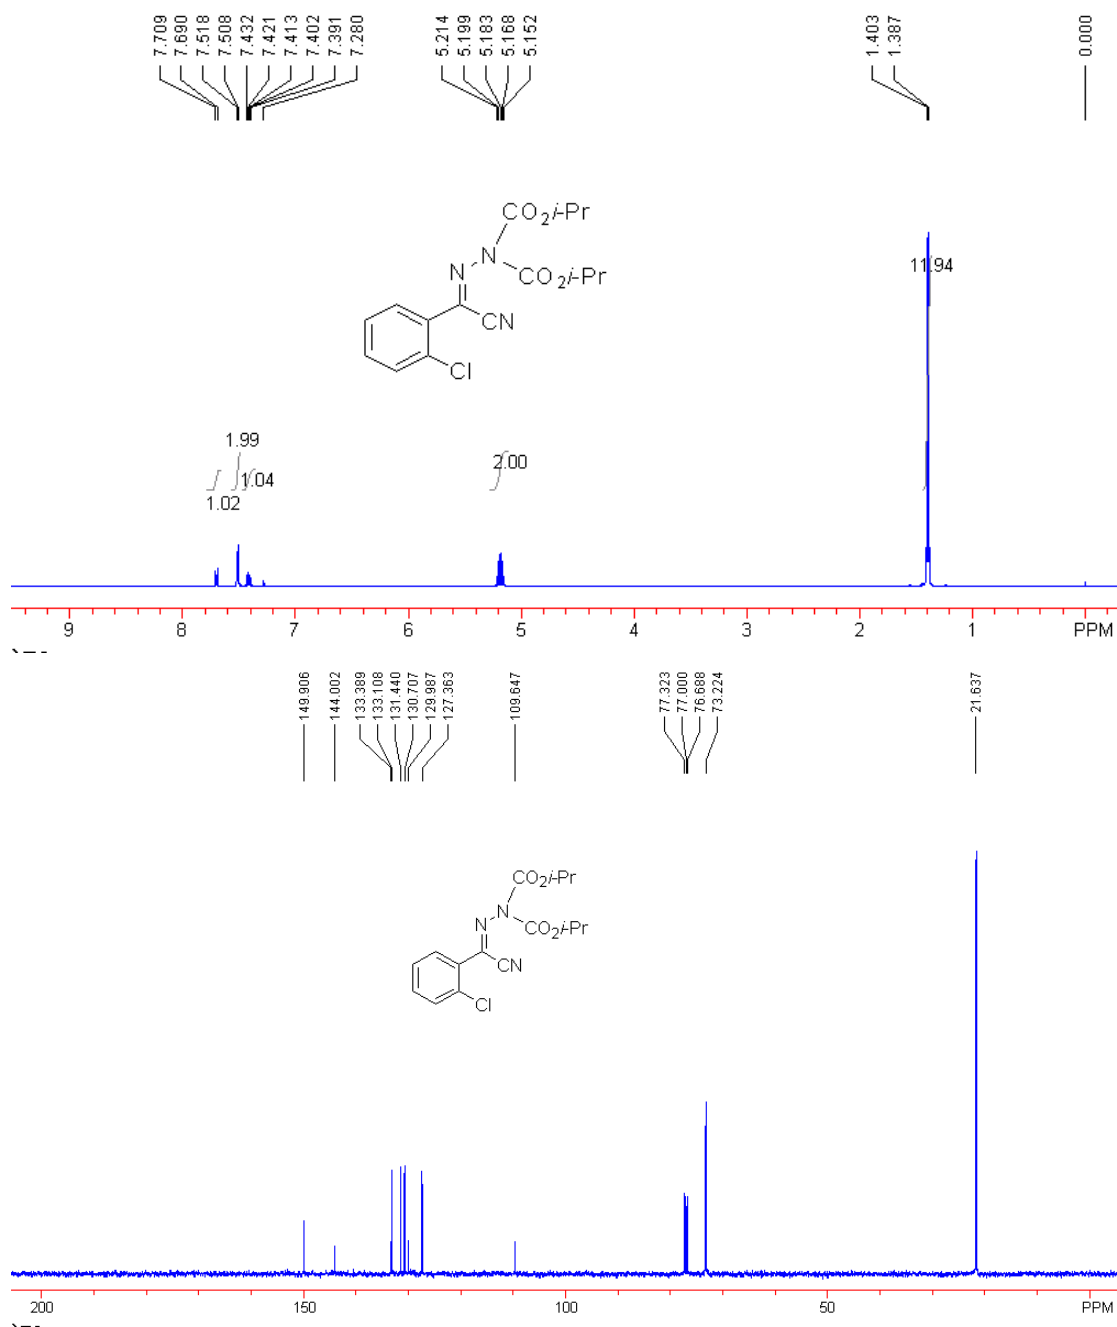



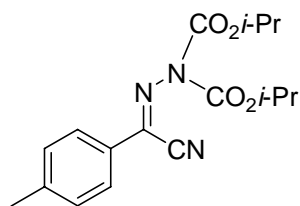

**(Z)-diisopropyl 2-(cyano(p-tolyl)methylene)hydrazine-1,1-dicarboxylate (3f).** Oil. IR (CH<sub>2</sub>Cl<sub>2</sub>)  $\nu$  2985, 2939, 2229, 1797, 1762, 1305, 1094, 910 cm<sup>-1</sup>; <sup>1</sup>H NMR (CDCl<sub>3</sub>, 400 MHz, TMS):  $\delta$  1.37 (12H, d,  $J$  = 6.0 Hz, CH<sub>3</sub>), 2.44 (3H, s, CH<sub>3</sub>), 5.12-5.19 (2H, m, CH), 7.31 (2H, d,  $J$  = 8.0 Hz, Ar), 7.93 (2H, d,  $J$  = 8.0 Hz, Ar). <sup>13</sup>C NMR (CDCl<sub>3</sub>, 100 MHz):  $\delta$  21.6, 72.8, 109.9, 127.8, 127.9, 144.4, 147.0, 150.4. MS (ESI)  $m/z$  332.0 (M<sup>+</sup>+1), 354.0 (M<sup>+</sup>+Na). HRMS (ESI) Calcd. for C<sub>17</sub>H<sub>21</sub>N<sub>3</sub>O<sub>4</sub> requires (M<sup>+</sup>+Na) 354.1430, Found 354.14226.

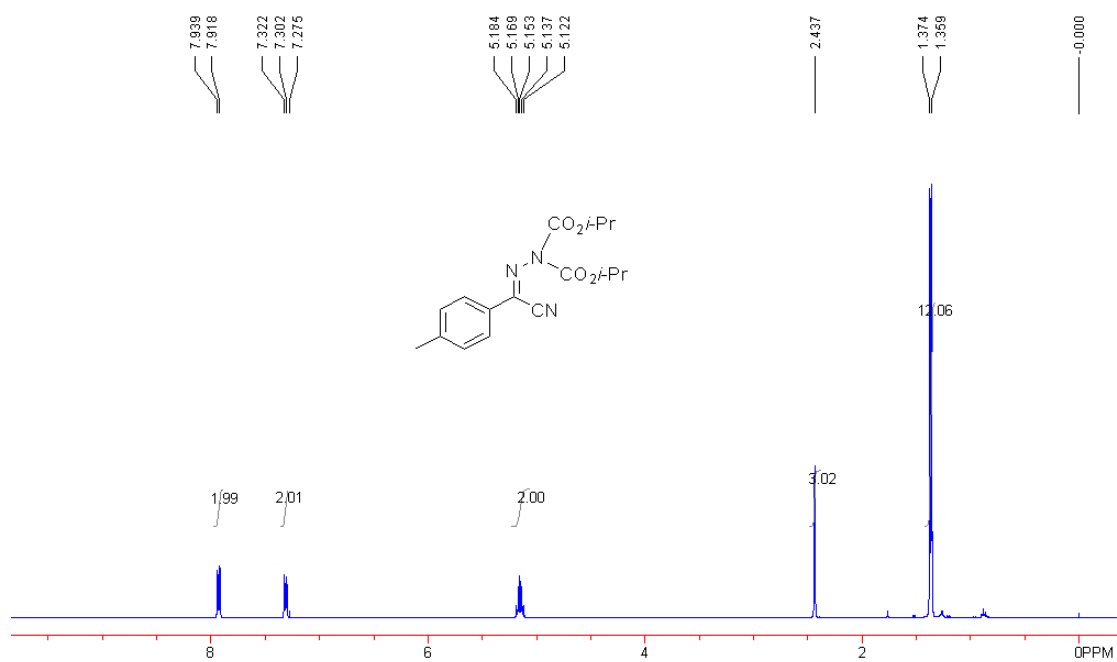

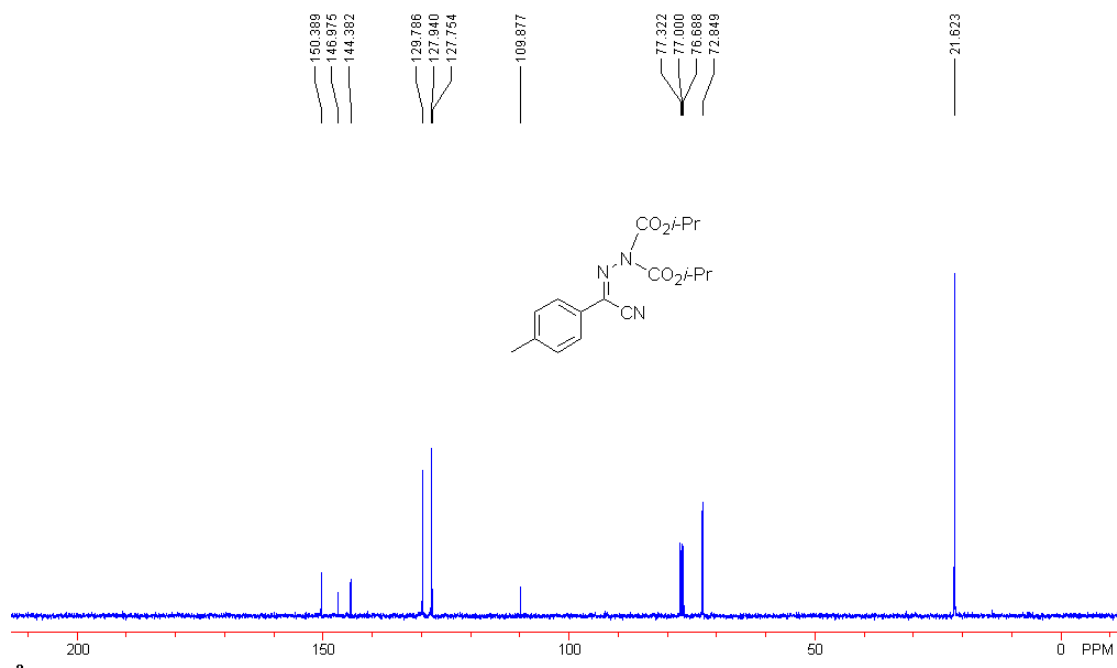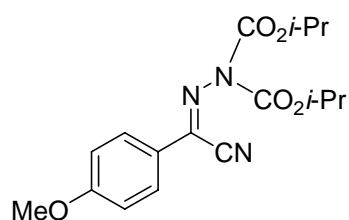

**(Z)-diisopropyl 2-(cyano(4-methoxyphenyl)methylene)hydrazine-1,1-dicarboxylate (3g).**

Oil. IR (CH<sub>2</sub>Cl<sub>2</sub>)  $\nu$  2985, 2939, 2228, 1795, 1764, 1606, 1308, 1095 cm<sup>-1</sup>; <sup>1</sup>H NMR (CDCl<sub>3</sub>, 300 MHz, TMS):  $\delta$  1.36 (12H, d,  $J$  = 6.3 Hz, CH<sub>3</sub>), 3.89 (3H, s, OCH<sub>3</sub>), 5.10-5.19 (2H, m, CH), 7.01 (2H, d,  $J$  = 9.0 Hz, Ar), 8.00 (2H, d,  $J$  = 9.0 Hz, Ar). <sup>13</sup>C NMR (CDCl<sub>3</sub>, 75 MHz):  $\delta$  21.6, 55.5, 72.7, 109.9, 114.5, 122.8, 130.0, 147.5, 150.4, 163.9. MS (ESI)  $m/z$  348.2 (M<sup>+</sup>+1).

HRMS (ESI) Calcd. for C<sub>17</sub>H<sub>21</sub>N<sub>3</sub>O<sub>5</sub> requires (M<sup>+</sup>+1) 348.1481, Found 348.15603.

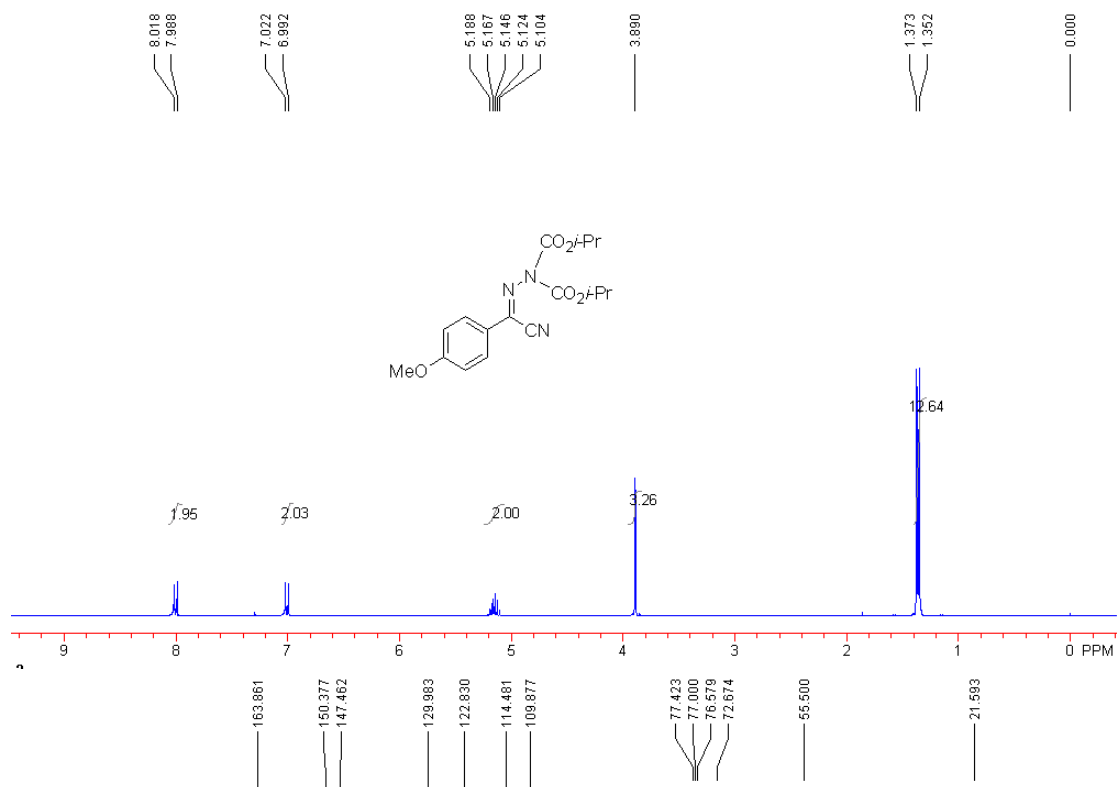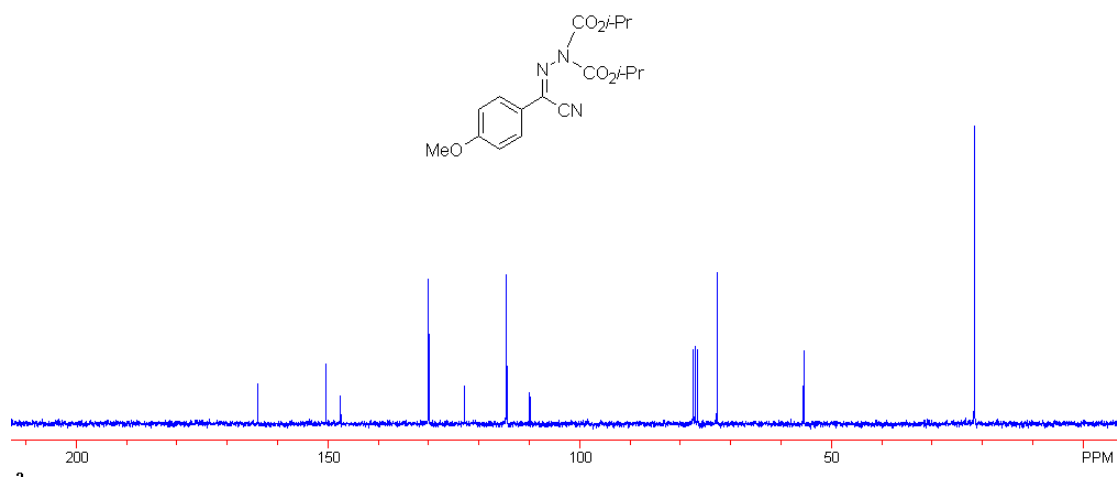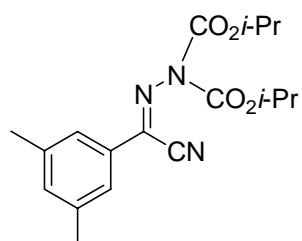

**(Z)-diisopropyl 2-(cyano(3,5-dimethylphenyl)methylene)hydrazine-1,1-dicarboxylate**

**(3h).** Oil. IR (CH<sub>2</sub>Cl<sub>2</sub>)  $\nu$  2985, 2939, 2229, 1789, 1763, 1609, 1233, 1095 cm<sup>-1</sup>; <sup>1</sup>H NMR

(CDCl<sub>3</sub>, 400 MHz, TMS):  $\delta$  1.37 (12H, d,  $J$  = 6.4 Hz, CH<sub>3</sub>), 2.39 (6H, s, CH<sub>3</sub>), 5.12-5.19 (2H, m, CH), 7.23 (1H, s, Ar), 7.65 (2H, s, Ar). <sup>13</sup>C NMR (CDCl<sub>3</sub>, 100 MHz):  $\delta$  21.1, 21.7, 72.9, 110.0, 125.7, 130.2, 135.2, 138.9, 147.5, 150.4. MS (ESI)  $m/z$  346.2 (M<sup>+</sup>+1). HRMS (MALDI) Calcd. for C<sub>18</sub>H<sub>23</sub>N<sub>3</sub>O<sub>4</sub> requires (M<sup>+</sup>+Na) 368.1588, Found 368.15808.

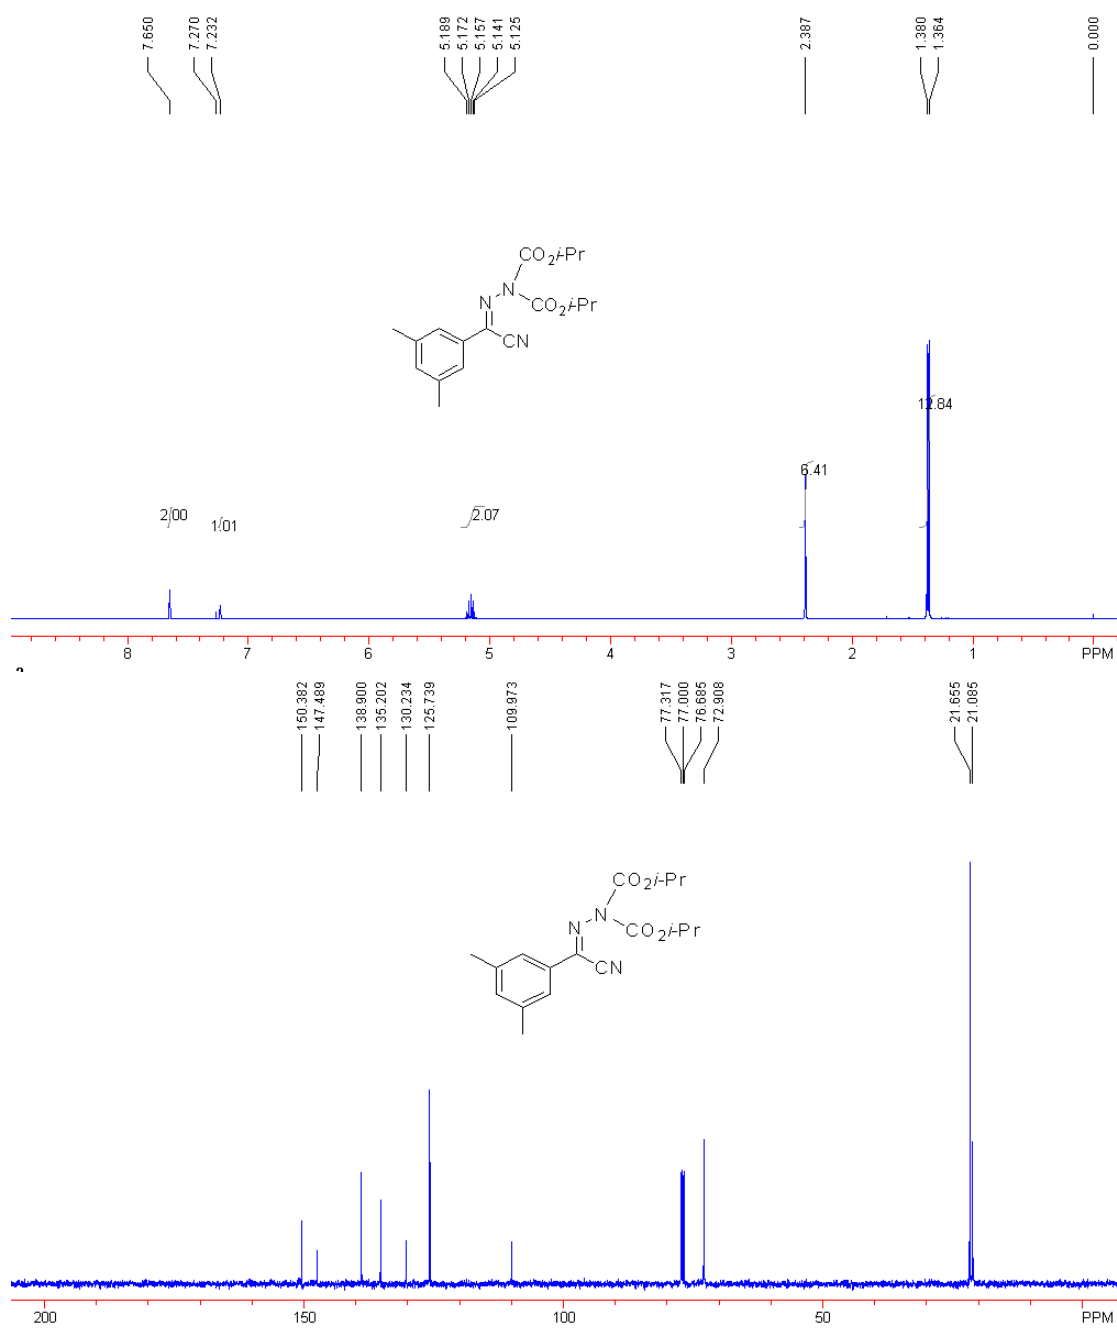

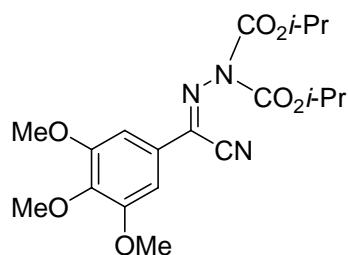

**(Z)-diisopropyl**

**2-(cyano(3,4,5-trimethoxyphenyl)methylene)hydrazine-1,1-dicarboxylate (3i).** Oil. IR (CH<sub>2</sub>Cl<sub>2</sub>)  $\nu$  2985, 2941, 1842, 2229, 1798, 1762, 1504, 1351, 1130 cm<sup>-1</sup>; <sup>1</sup>H NMR (CDCl<sub>3</sub>, 400 MHz, TMS):  $\delta$  1.38 (12H, d, *J* = 6.0 Hz, CH<sub>3</sub>), 3.93 (6H, s, OCH<sub>3</sub>), 3.94 (3H, s, OCH<sub>3</sub>), 5.13-5.20 (2H, m, CH), 7.28 (2H, s, Ar). <sup>13</sup>C NMR (CDCl<sub>3</sub>, 100 MHz):  $\delta$  21.7, 56.3, 61.0, 73.0, 105.3, 110.0, 125.5, 142.8, 146.7, 150.4, 153.5. MS (ESI) *m/z* 408.0 (M<sup>+</sup>+1). HRMS (ESI) Calcd. for C<sub>19</sub>H<sub>25</sub>N<sub>3</sub>O<sub>7</sub> requires (M<sup>+</sup>+Na) 430.1585 Found 430.15769.

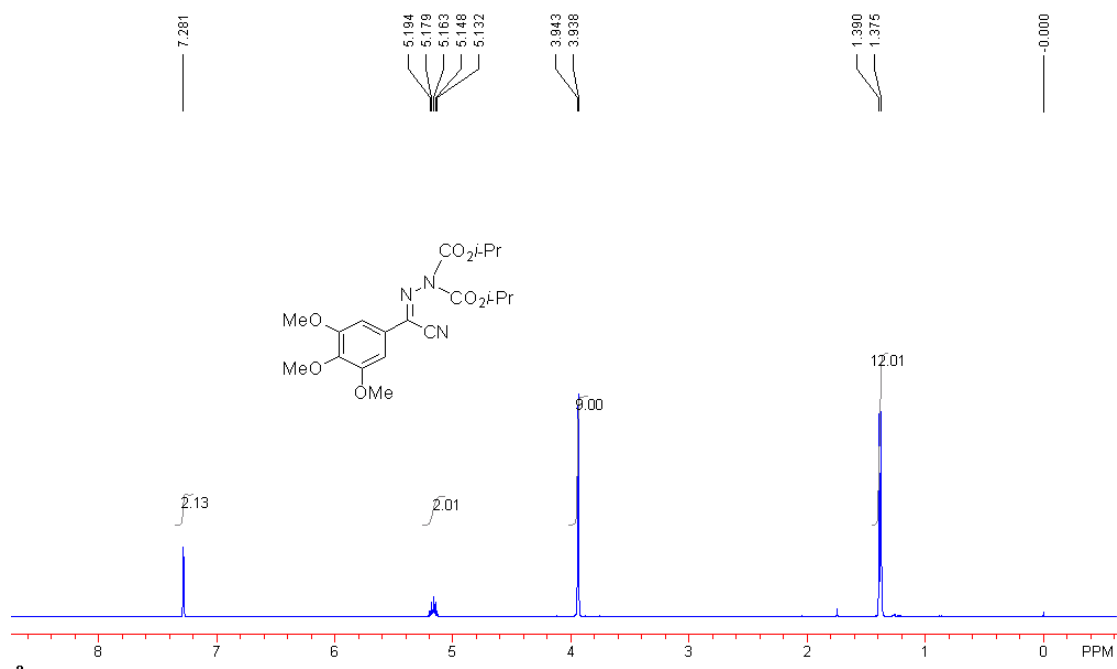

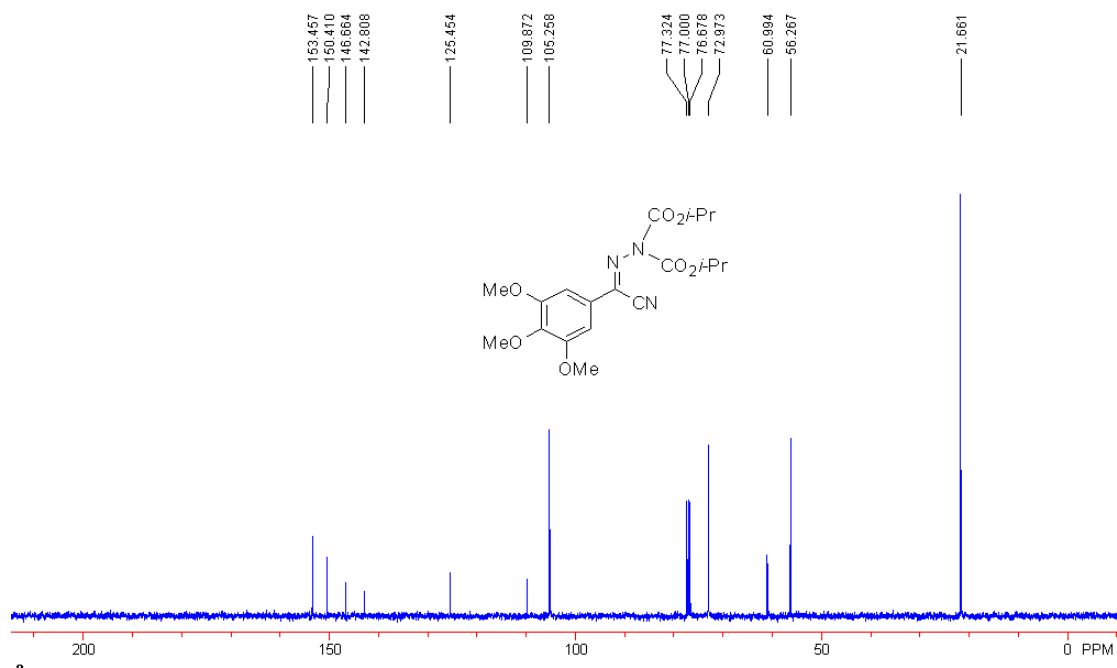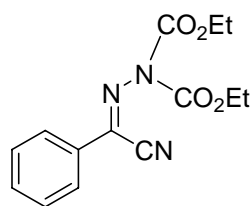

**(Z)-diethyl 2-(cyano(phenyl)methylene)hydrazine-1,1-dicarboxylate (3j).** Oil. IR (CH<sub>2</sub>Cl<sub>2</sub>)  $\nu$  2985, 2938, 2228, 1802, 1768, 1102 cm<sup>-1</sup>; <sup>1</sup>H NMR (CDCl<sub>3</sub>, 400 MHz, TMS):  $\delta$  1.37 (6H, t,  $J = 7.6$  Hz, CH<sub>3</sub>), 4.40 (4H, q,  $J = 7.6$  Hz, CH<sub>2</sub>), 7.52 (2H, t,  $J = 8.0$  Hz, Ar), 7.62 (1H, t,  $J = 7.6$  Hz, Ar), 8.05 (2H, d,  $J = 7.2$  Hz, Ar). <sup>13</sup>C NMR (CDCl<sub>3</sub>, 100 MHz):  $\delta$  14.0, 64.4, 109.6, 128.0, 129.1, 130.2, 133.5, 147.4, 150.5. MS (ESI)  $m/z$  290.2 (M<sup>+</sup>+1), 312.2 (M<sup>+</sup>+Na). HRMS (ESI) Calcd. for C<sub>14</sub>H<sub>15</sub>N<sub>3</sub>O<sub>4</sub> requires (M<sup>+</sup>+1) 290.1063 Found 290.11353.

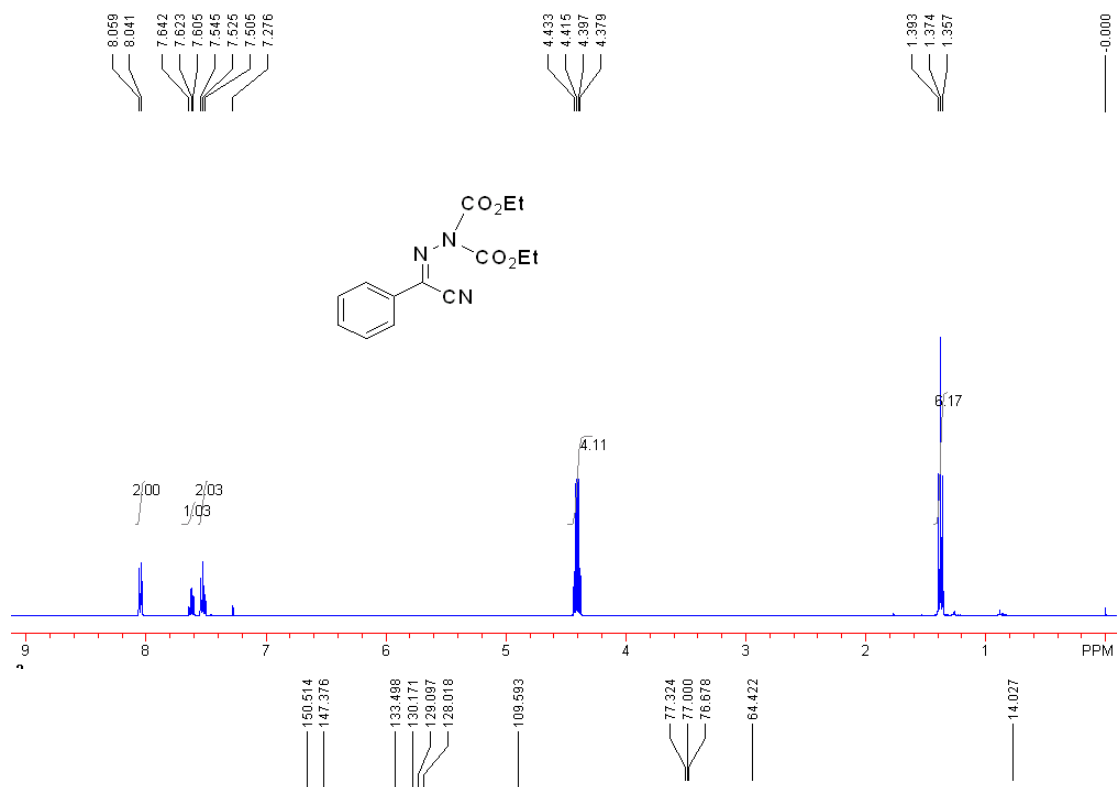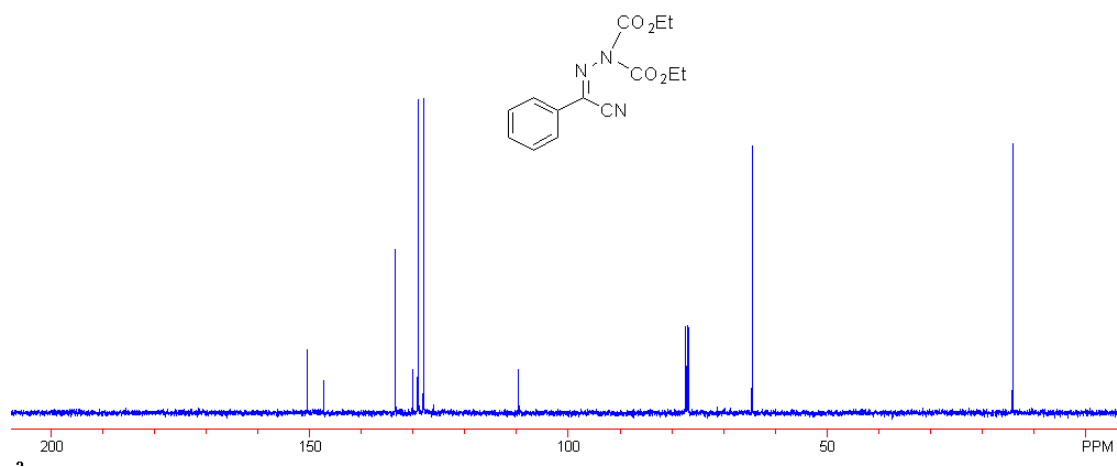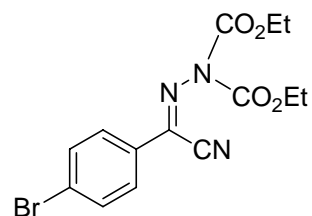

**(Z)-diethyl 2-((4-bromophenyl)(cyano)methylene)hydrazine-1,1-dicarboxylate (3k).** mp.

82-84 °C; IR (CH<sub>2</sub>Cl<sub>2</sub>)  $\nu$  2984, 1937, 2228, 1802, 1767, 1588, 1310, 1006 cm<sup>-1</sup>; <sup>1</sup>H NMR

(CDCl<sub>3</sub>, 400 MHz, TMS):  $\delta$  1.38 (6H, t,  $J = 7.2$  Hz, CH<sub>3</sub>), 4.41 (4H, q,  $J = 7.2$  Hz, CH<sub>2</sub>), 7.66 (2H, d,  $J = 8.8$  Hz, Ar), 7.90 (2H, d,  $J = 8.8$  Hz, Ar). <sup>13</sup>C NMR (CDCl<sub>3</sub>, 100 MHz):  $\delta$  14.0, 64.6, 109.3, 128.5, 129.2, 132.4, 145.2, 150.5. MS (ESI)  $m/z$  368.0 (M<sup>+</sup>+1). HRMS (ESI) Calcd. for C<sub>14</sub>H<sub>14</sub>BrN<sub>3</sub>O<sub>4</sub> requires (M<sup>+</sup>+1) 368.0168 Found 368.02421.

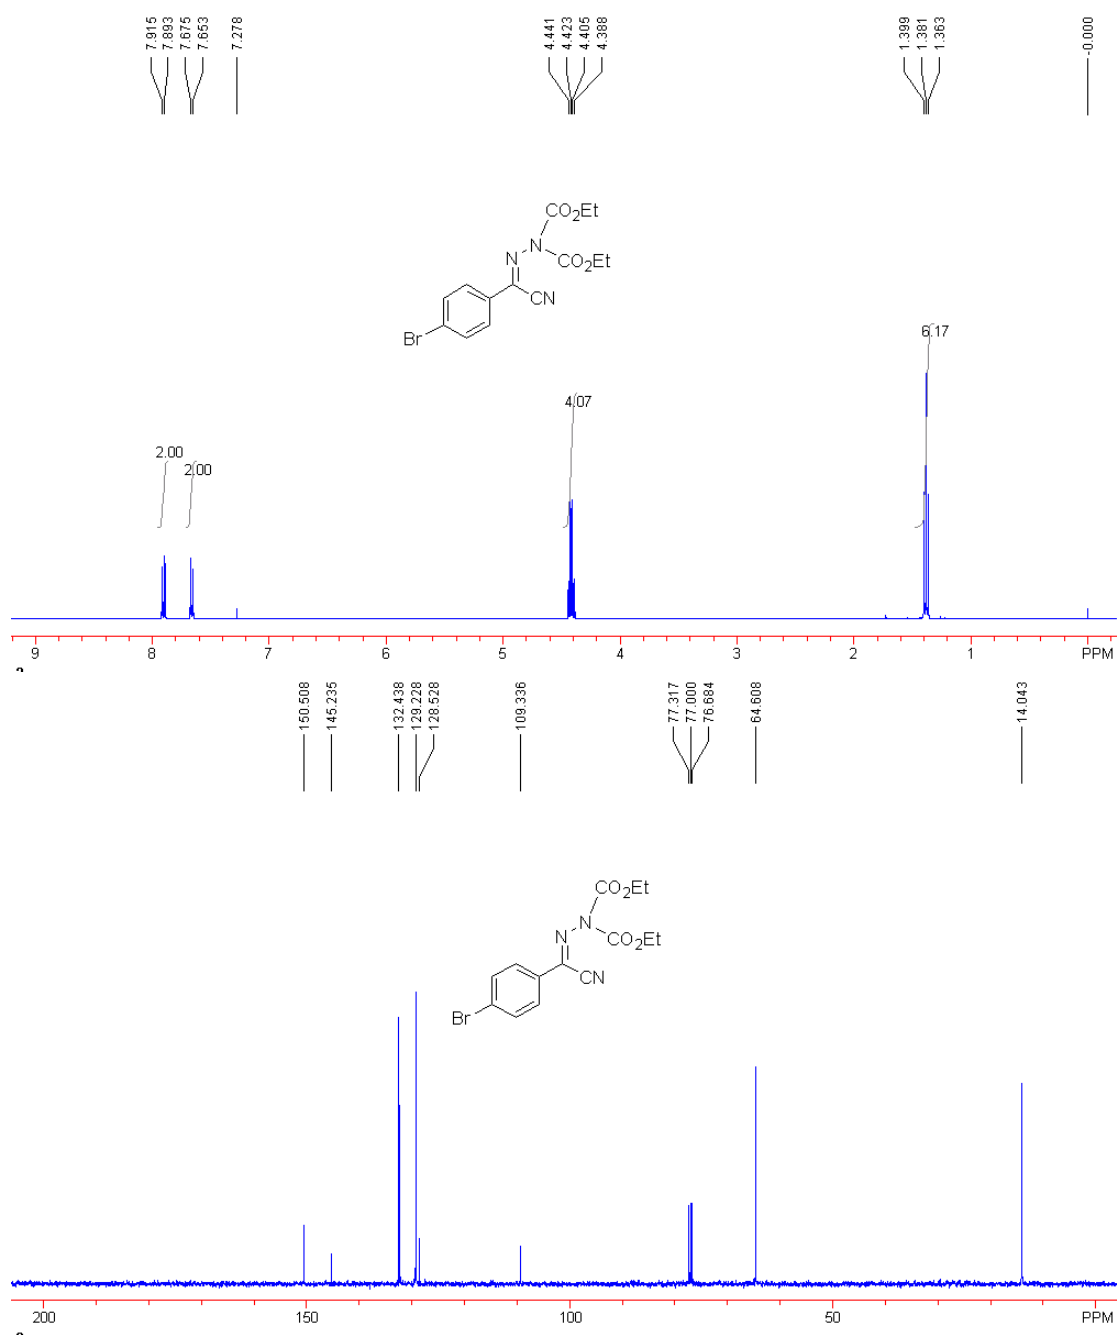



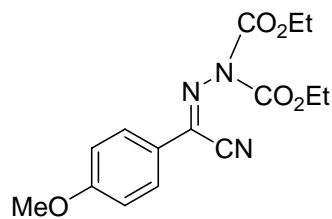

**(Z)-diethyl 2-(cyano(4-methoxyphenyl)methylene)hydrazine-1,1-dicarboxylate (31).** Oil.

IR (CH<sub>2</sub>Cl<sub>2</sub>)  $\nu$  2984, 2939, 2229, 1799, 1761, 1605, 1176, 1103 cm<sup>-1</sup>; <sup>1</sup>H NMR (CDCl<sub>3</sub>, 400 MHz, TMS):  $\delta$  1.36 (6H, t,  $J$  = 7.2 Hz, CH<sub>3</sub>), 3.89 (3H, s, OCH<sub>3</sub>), 4.38 (4H, q,  $J$  = 7.2 Hz, CH<sub>2</sub>), 7.01 (2H, d,  $J$  = 9.2 Hz, Ar), 8.01 (2H, d,  $J$  = 9.2 Hz, Ar). <sup>13</sup>C NMR (CDCl<sub>3</sub>, 75 MHz):  $\delta$  14.1, 55.6, 64.3, 109.8, 114.7, 122.9, 130.3, 148.7, 150.7, 164.2. MS (ESI)  $m/z$  320.2

(M<sup>+</sup>+1). HRMS (ESI) Calcd. for C<sub>15</sub>H<sub>17</sub>N<sub>3</sub>O<sub>5</sub> requires (M<sup>+</sup>+1) 320.1168 Found 320.12407.

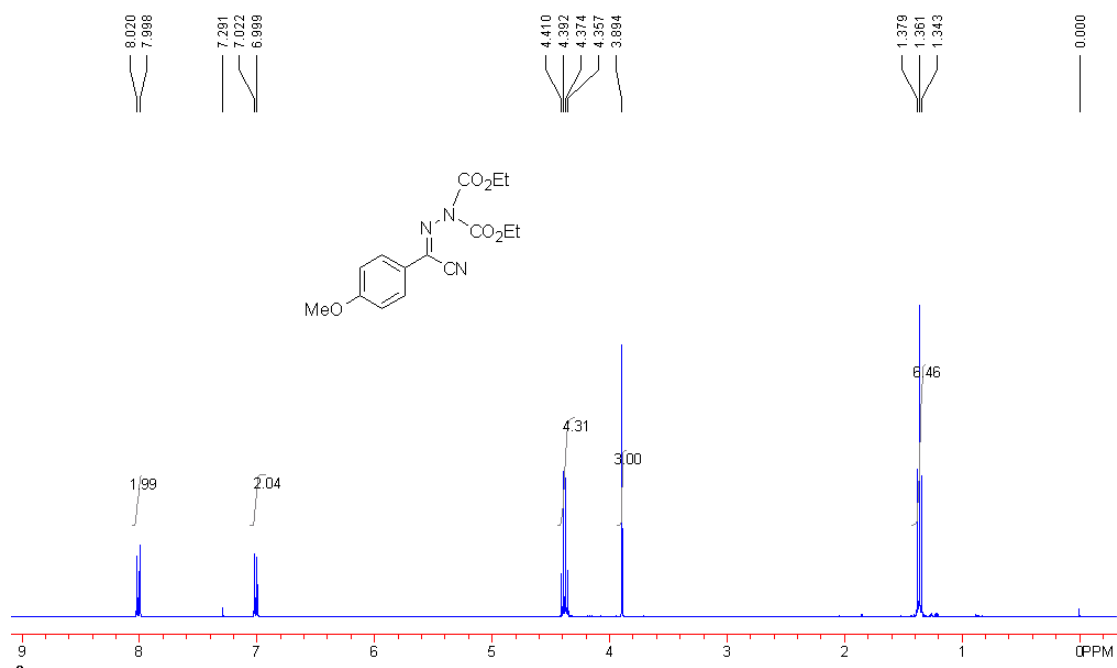

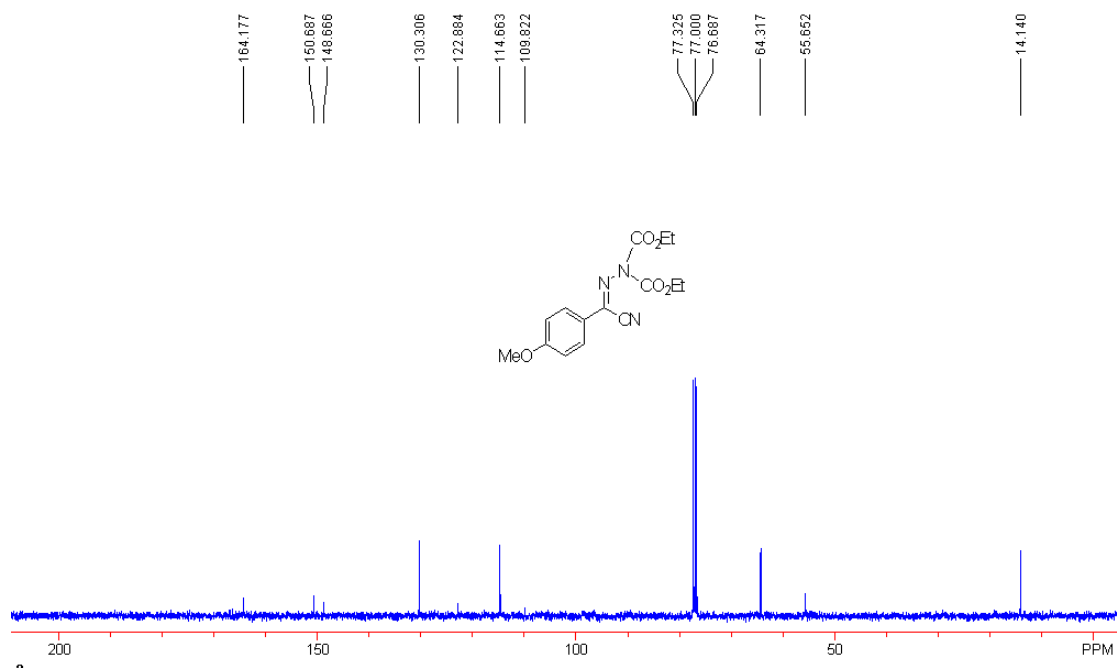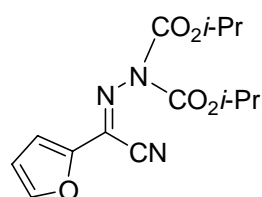

**(E)-diisopropyl 2-(cyano(furan-2-yl)methylene)hydrazine-1,1-dicarboxylate (3m).** Oil. IR ( $\text{CH}_2\text{Cl}_2$ )  $\nu$  3131, 2986, 2940, 2234, 1791, 1794, 1095  $\text{cm}^{-1}$ ;  $^1\text{H}$  NMR ( $\text{CDCl}_3$ , 400 MHz, TMS):  $\delta$  1.37 (12H, d,  $J = 6.0$  Hz,  $\text{CH}_3$ ), 5.12-5.19 (2H, m, CH), 6.65 (1H, dd,  $J_1 = 1.6$  Hz,  $J_2 = 3.6$  Hz, Ar), 7.25 (1H, dd,  $J_1 = 0.8$  Hz,  $J_2 = 3.6$  Hz, Ar), 7.72 (1H, dd,  $J_1 = 0.8$  Hz,  $J_2 = 1.6$  Hz, Ar).  $^{13}\text{C}$  NMR ( $\text{CDCl}_3$ , 100 MHz):  $\delta$  21.6, 73.1, 108.8, 113.0, 119.1, 135.6, 145.9, 147.9, 150.3. MS (ESI)  $m/z$  308.2 ( $\text{M}^+ + 1$ ). HRMS (ESI) Calcd. for  $\text{C}_{14}\text{H}_{17}\text{N}_3\text{O}_5$  requires ( $\text{M}^+ + 1$ ) 308.1168 Found 308.12402.

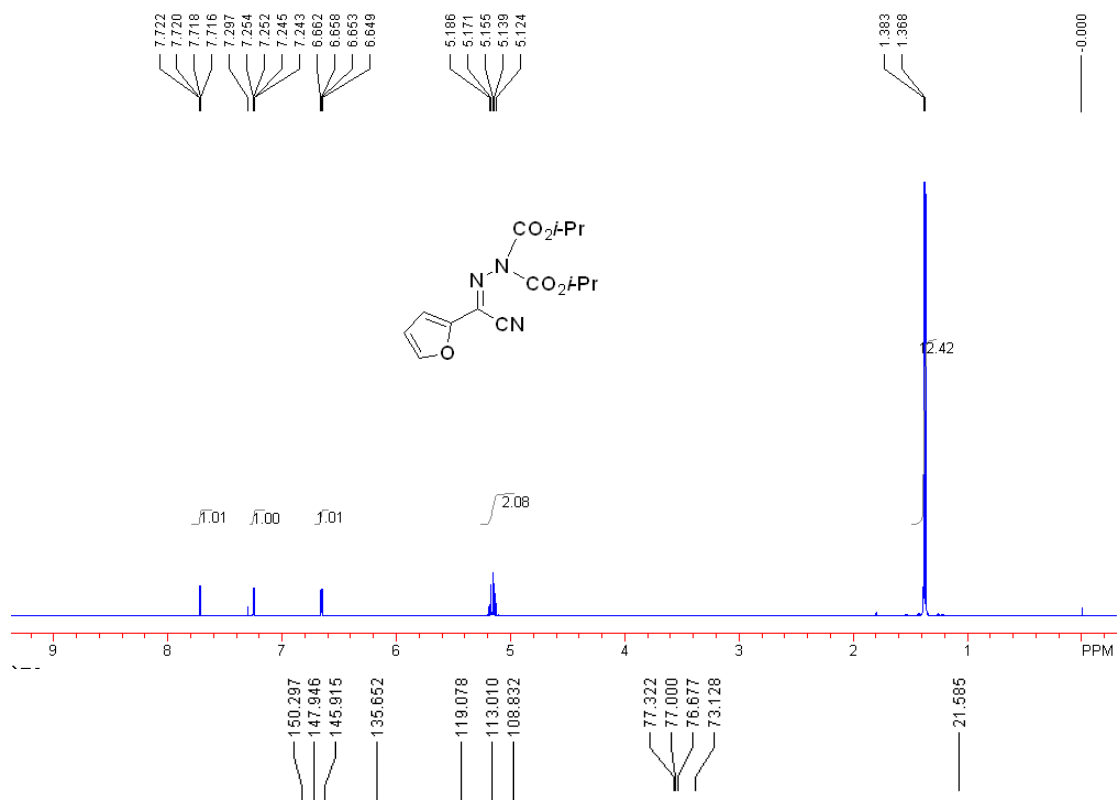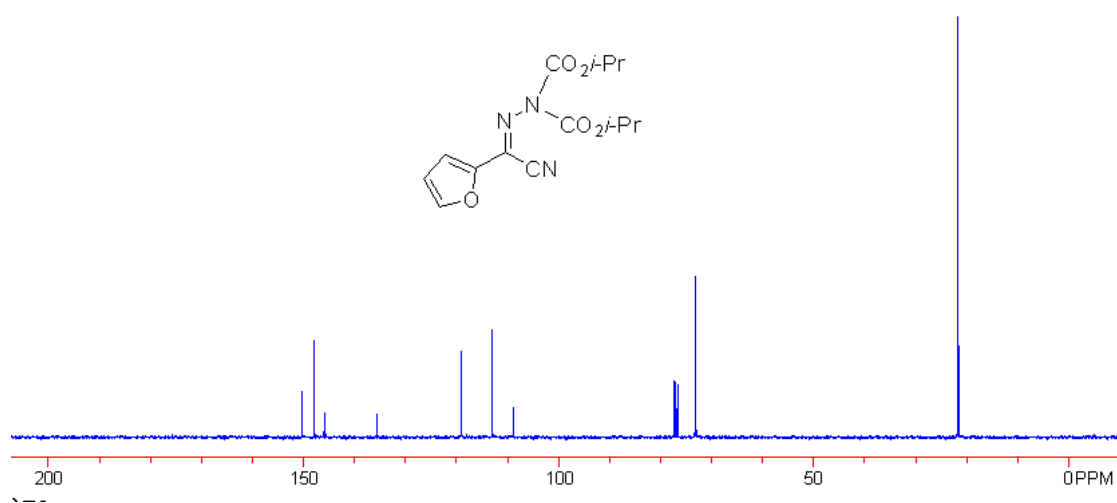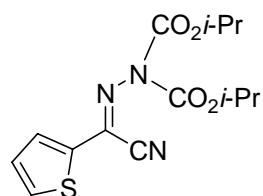

**(E)-diisopropyl 2-(cyano(thiophen-2-yl)methylene)hydrazine-1,1-dicarboxylate (3n).** Oil.

IR (CH<sub>2</sub>Cl<sub>2</sub>)  $\nu$  3107, 2984, 2938, 2230, 1795, 1763, 1309, 1093 cm<sup>-1</sup>; <sup>1</sup>H NMR (CDCl<sub>3</sub>, 400 MHz, TMS):  $\delta$  1.37 (12H, d,  $J$  = 6.0 Hz, CH<sub>3</sub>), 5.11-5.18 (2H, m, CH), 7.20 (1H, dd,  $J_1$  = 4.4

Hz,  $J_2 = 5.2$  Hz, Ar), 7.64 (1H, dd,  $J_1 = 1.2$  Hz,  $J_2 = 5.2$  Hz, Ar), 7.75 (1H, dd,  $J_1 = 1.2$  Hz,  $J_2 = 4.4$  Hz, Ar).  $^{13}\text{C}$  NMR ( $\text{CDCl}_3$ , 100 MHz):  $\delta$  21.6, 72.9, 109.2, 128.2, 133.3, 134.3, 135.2, 141.6, 150.3. MS (ESI)  $m/z$  324.2 ( $\text{M}^+ + 1$ ). HRMS (ESI) Calcd. for  $\text{C}_{14}\text{H}_{17}\text{N}_3\text{O}_4\text{S}$  requires ( $\text{M}^+ + 1$ ) 324.0940 Found 324.10089.

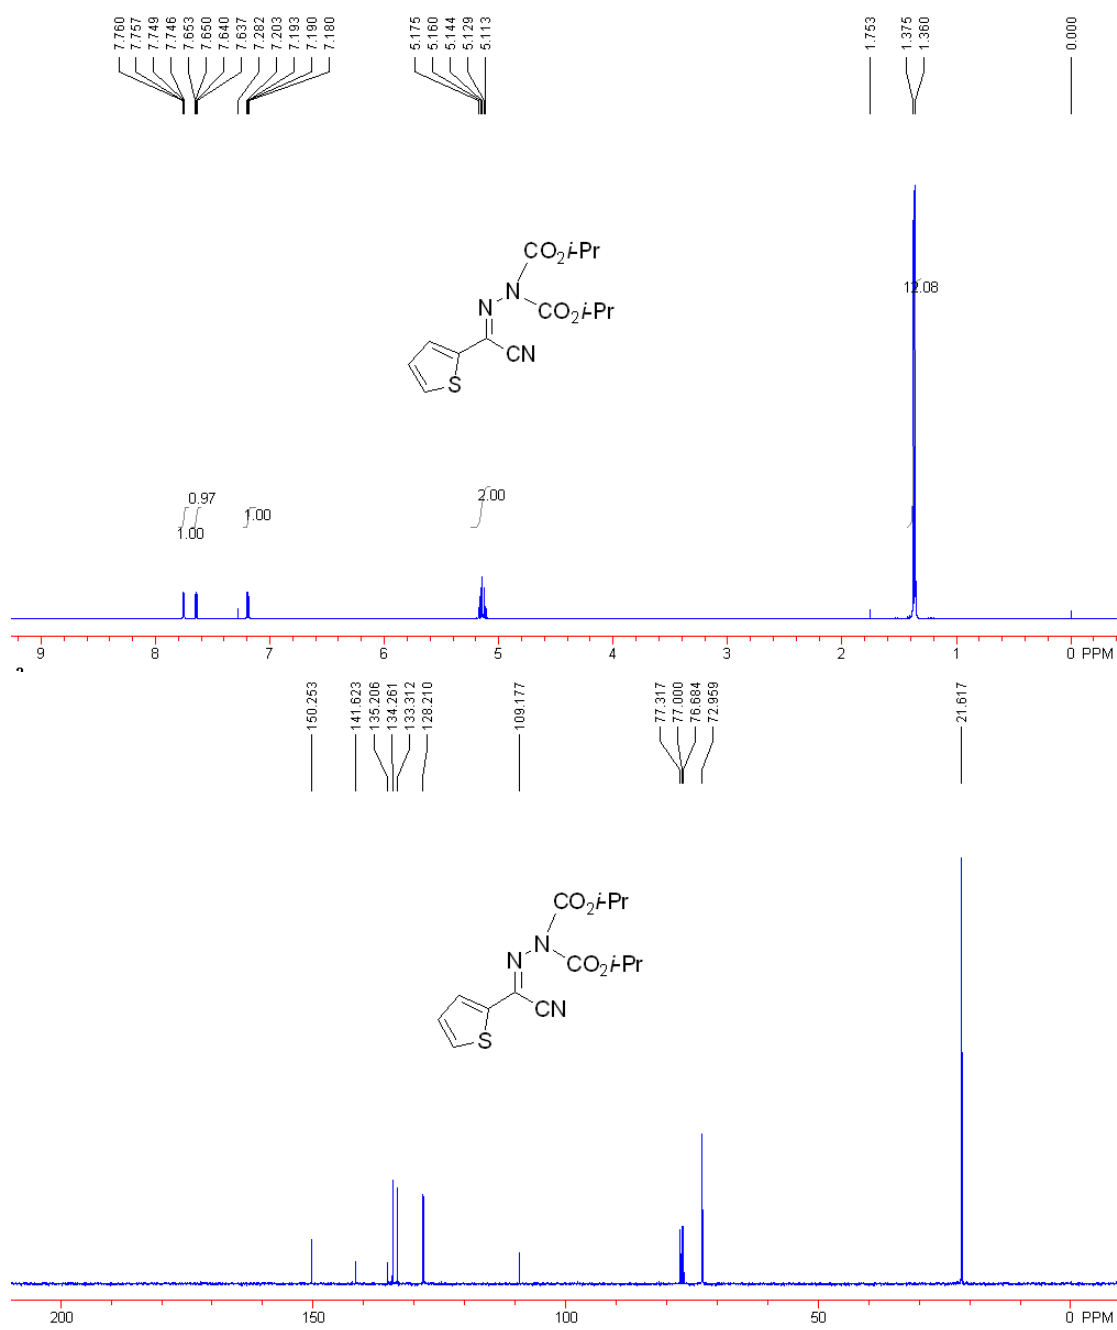

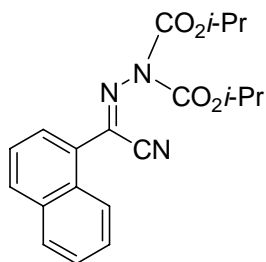

**(Z)-diisopropyl 2-(cyano(naphthalen-1-yl)methylene)hydrazine-1,1-dicarboxylate (3o).**

Oil. IR (CH<sub>2</sub>Cl<sub>2</sub>)  $\nu$  2985, 2939, 2226, 1798, 1761, 1511, 1093 cm<sup>-1</sup>; <sup>1</sup>H NMR (CDCl<sub>3</sub>, 400 MHz, TMS):  $\delta$  1.42 (12H, d,  $J$  = 6.0 Hz, CH<sub>3</sub>), 5.18-5.25 (2H, m, CH), 7.55-7.67 (3H, m, Ar), 7.91-7.93 (1H, m, Ar), 8.00-8.03 (1H, m, Ar), 8.05 (1H, d,  $J$  = 8.0 Hz, Ar), 8.99 (1H, d,  $J$  = 8.4 Hz, Ar). <sup>13</sup>C NMR (CDCl<sub>3</sub>, 100 MHz):  $\delta$  21.7, 73.0, 110.7, 124.7, 125.5, 127.0, 127.3, 128.5, 128.8, 130.0, 131.1, 133.9, 148.7, 150.1. MS (ESI)  $m/z$  368.0 (M<sup>+</sup>+1), 389.9 (M<sup>+</sup>+Na). HRMS (ESI) Calcd. for C<sub>20</sub>H<sub>21</sub>N<sub>3</sub>O<sub>4</sub> requires (M<sup>+</sup>+Na) 390.1424 Found 390.14222.

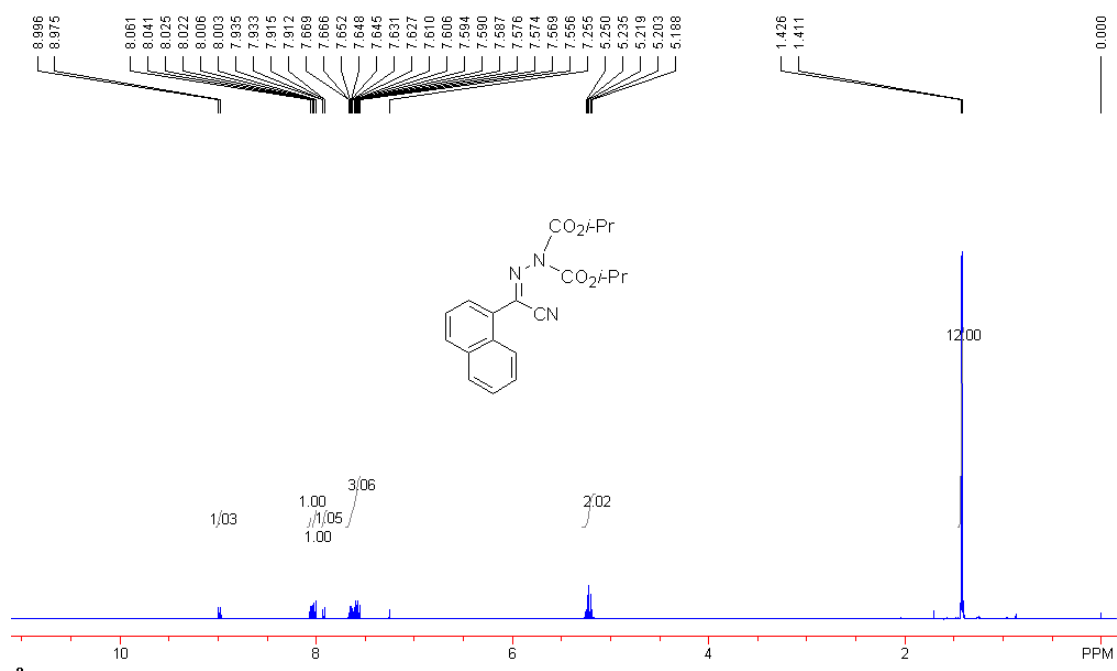

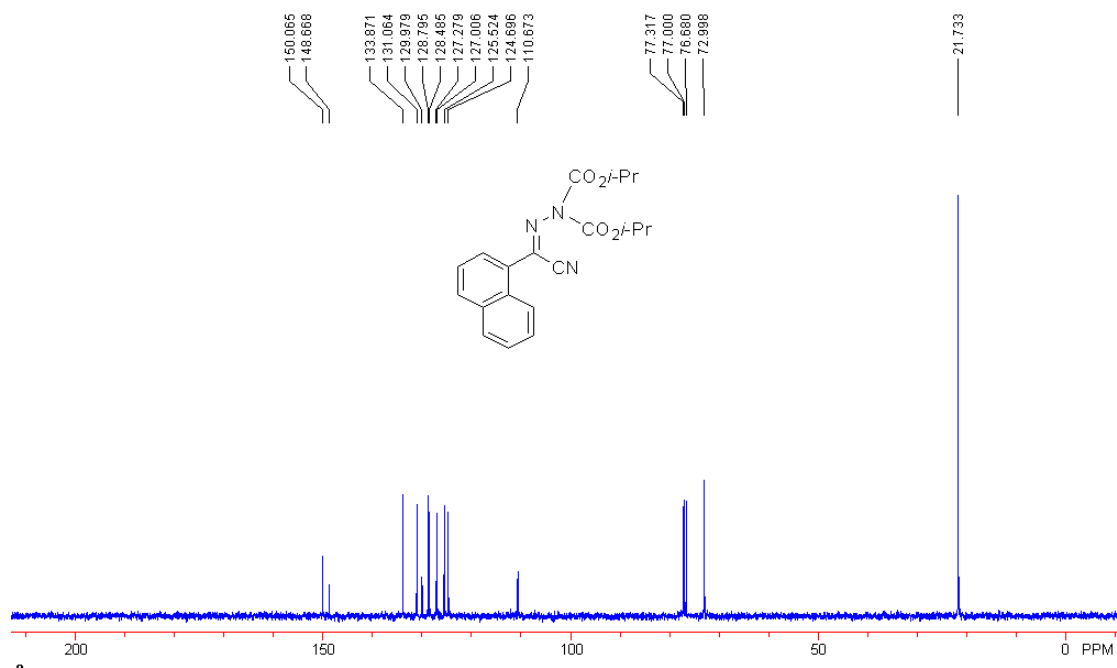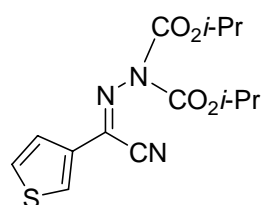

**(Z)-diisopropyl 2-(cyano(thiophen-3-yl)methylene)hydrazine-1,1-dicarboxylate (3p).** Oil.

IR (CH<sub>2</sub>Cl<sub>2</sub>)  $\nu$  3107, 2984, 1938, 2230, 1795, 1763, 1561, 1093 cm<sup>-1</sup>; <sup>1</sup>H NMR (CDCl<sub>3</sub>, 400 MHz, TMS):  $\delta$  1.37 (12H, d,  $J$  = 6.4 Hz, CH<sub>3</sub>), 5.12-5.19 (2H, m, CH), 7.44 (1H, dd,  $J_1$  = 2.8 Hz,  $J_2$  = 5.2 Hz, Ar), 7.68 (1H, dd,  $J_1$  = 1.2 Hz,  $J_2$  = 5.2 Hz, Ar), 8.08 (1H, dd,  $J_1$  = 1.2 Hz,  $J_2$  = 2.8 Hz, Ar). <sup>13</sup>C NMR (CDCl<sub>3</sub>, 100 MHz):  $\delta$  21.7, 73.0, 110.1, 125.3, 128.0, 132.1, 133.9, 141.8, 150.4. MS (ESI)  $m/z$  323.9 (M<sup>+</sup>+1). HRMS (ESI) Calcd. for C<sub>14</sub>H<sub>17</sub>N<sub>3</sub>O<sub>4</sub>S requires (M<sup>+</sup>+Na) 346.0832 Found 346.08304.

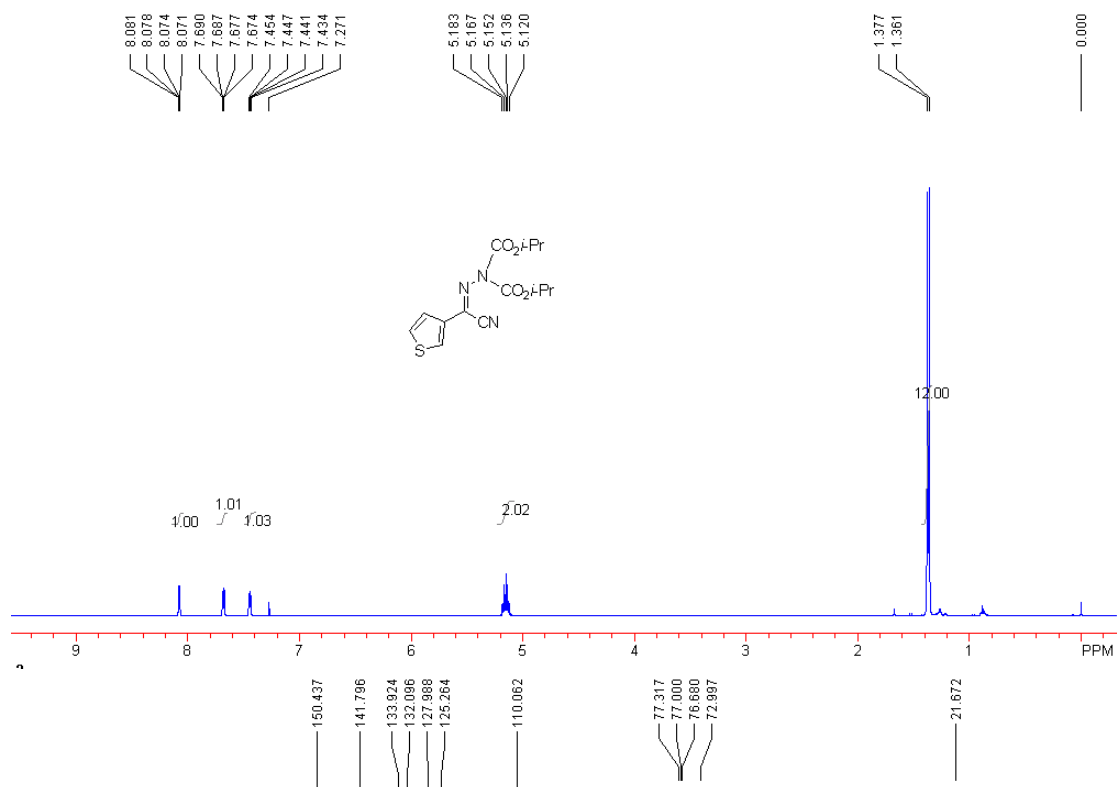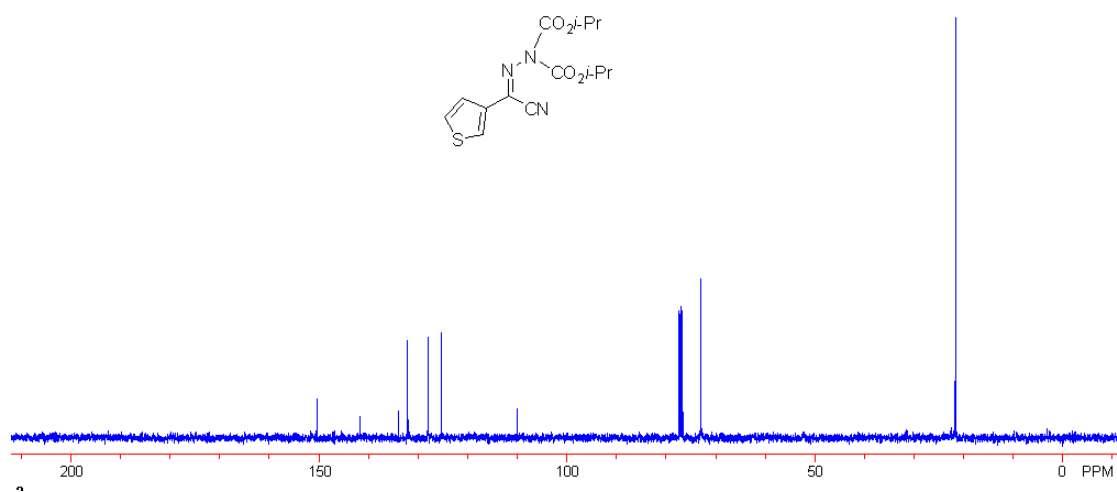

### Typical reaction procedure for the preparation of **4**.

To a stirred solution of acyl cyanide **1** (0.3 mmol) and  $\text{Ph}_3\text{P}$  (0.3 mmol) in anhydrous toluene (2.0 mL) under argon was added diisopropyl azodicarboxylate/diethyl azodicarboxylate **2** (0.3 mmol) at 20 degree, the mixture was maintained at 20 degree to stir for the time needed. The solvent was removed under reduced pressure on a rotary evaporator. The residue was subjected to column chromatography on silica gel (300-400 mesh) to afford the products **4**.

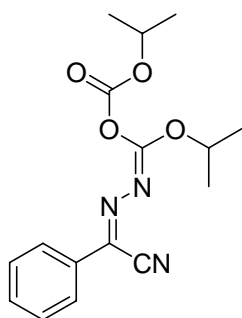

**(4a)** Oil. IR ( $\text{CH}_2\text{Cl}_2$ )  $\nu$  2986, 2940, 1783, 1626, 1214, 1095  $\text{cm}^{-1}$ ;  $^1\text{H}$  NMR ( $\text{CDCl}_3$ , 400 MHz, TMS):  $\delta$  1.34 (6H, d,  $J = 6.0$  Hz,  $\text{CH}_3$ ), 1.48 (6H, d,  $J = 6.0$  Hz,  $\text{CH}_3$ ), 4.91-4.99 (1H, m, CH), 5.31-5.38 (1H, m, CH), 7.42-7.52 (3H, m, Ar), 7.92-7.95 (2H, m, Ar).  $^{13}\text{C}$  NMR ( $\text{CDCl}_3$ , 100 MHz):  $\delta$  21.2, 21.4, 74.9, 76.6, 110.9, 127.2, 128.8, 131.4, 131.8, 138.4, 148.6, 155.7. MS (ESI)  $m/z$  318.0 ( $\text{M}^++1$ ), 340.1 ( $\text{M}^++\text{Na}$ ). HRMS (ESI) Calcd. for  $\text{C}_{16}\text{H}_{19}\text{N}_3\text{O}_4$  requires ( $\text{M}^++\text{Na}$ ) 340.1268 Found 340.12676.



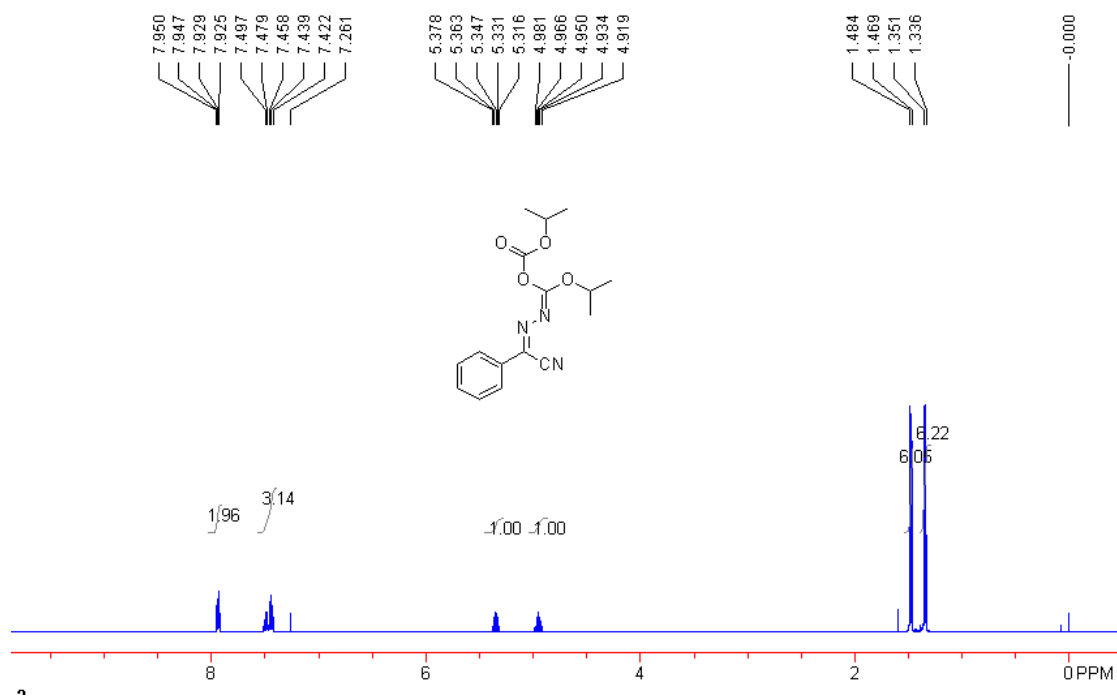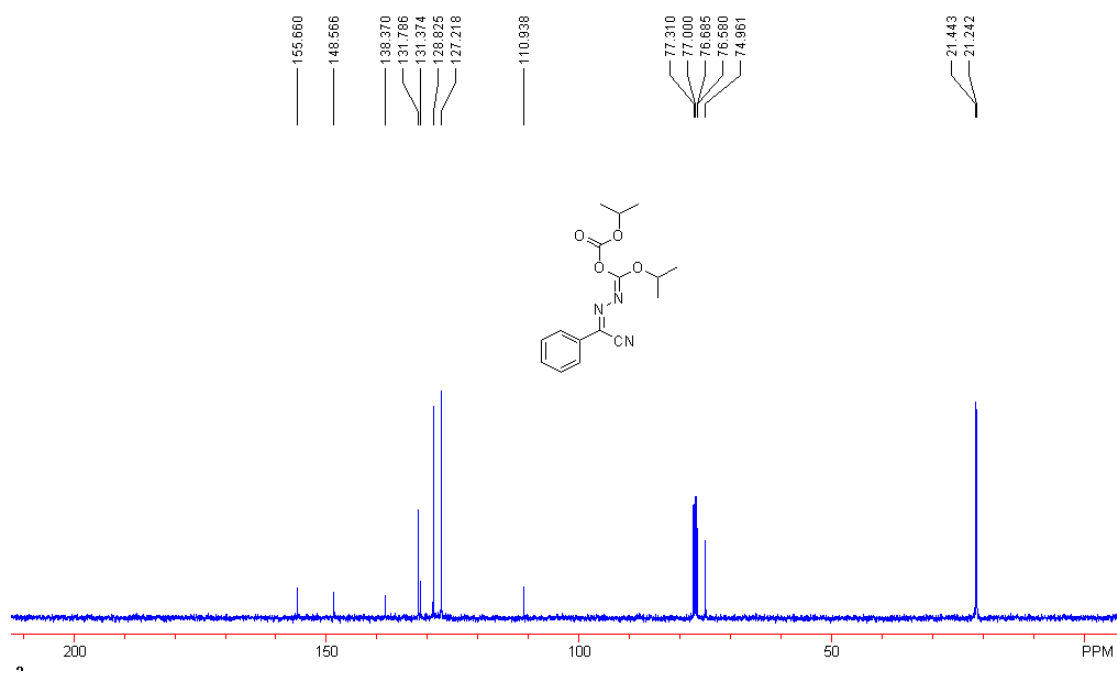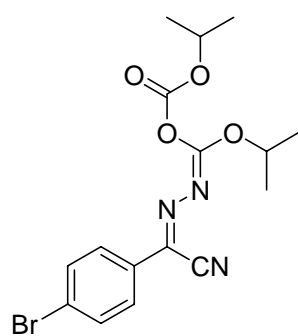

**(4b)** Oil. IR (CH<sub>2</sub>Cl<sub>2</sub>)  $\nu$  2986, 1939, 2225, 1783, 1622, 1213, 1095 cm<sup>-1</sup>; <sup>1</sup>H NMR (CDCl<sub>3</sub>,

300 MHz, TMS):  $\delta$  1.35 (6H, d,  $J = 6.3$  Hz, CH<sub>3</sub>), 1.48 (6H, d,  $J = 6.3$  Hz, CH<sub>3</sub>), 4.90-4.99 (1H, m, CH), 5.30-5.39 (1H, m, CH), 7.58 (2H, d,  $J = 8.7$  Hz, Ar), 7.80 (2H, d,  $J = 8.7$  Hz, Ar).  
<sup>13</sup>C NMR (CDCl<sub>3</sub>, 75 MHz):  $\delta$  21.2, 21.4, 75.0, 76.8, 110.6, 126.5, 128.5, 130.3, 132.1, 137.3, 148.5, 155.9. MS (ESI)  $m/z$  395.9 (M<sup>+</sup>+1), 418.9 (M<sup>+</sup>+Na). HRMS (ESI) Calcd. for C<sub>16</sub>H<sub>18</sub>BrN<sub>3</sub>O<sub>4</sub> requires (M<sup>+</sup>+Na) 418.0373 Found 418.03621.

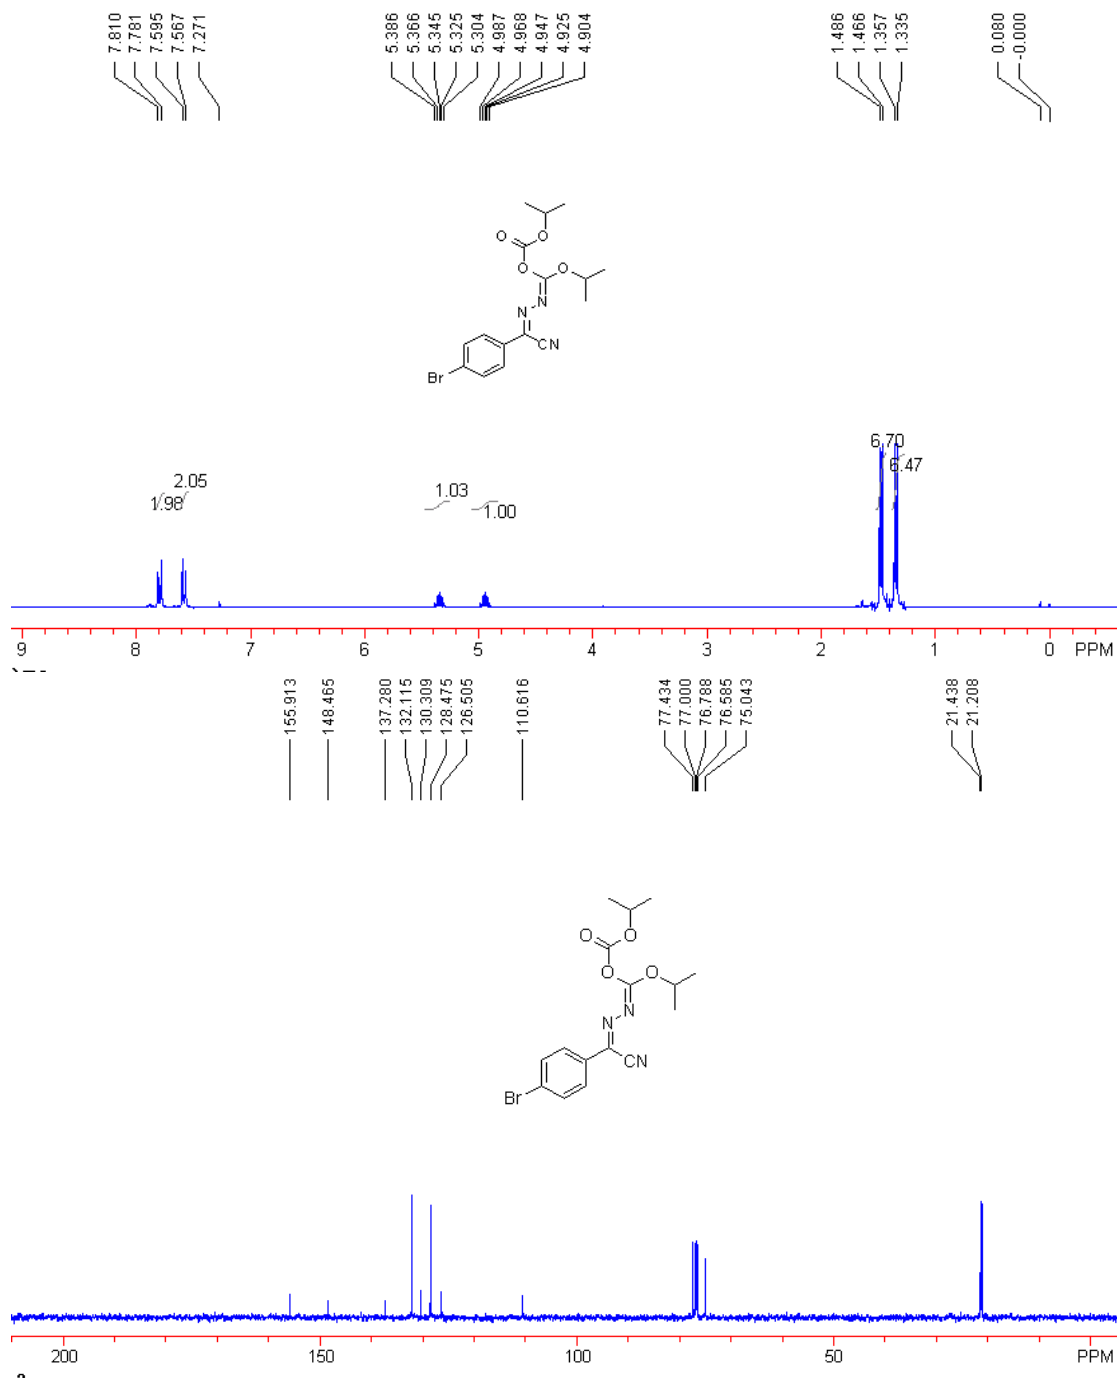

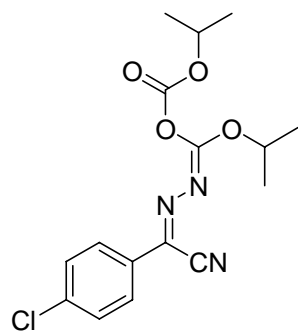

(4c) Oil. IR (CH<sub>2</sub>Cl<sub>2</sub>)  $\nu$  2987, 2940, 2225, 1783, 1622, 1214, 1094 cm<sup>-1</sup>; <sup>1</sup>H NMR (CDCl<sub>3</sub>, 400 MHz, TMS):  $\delta$  1.35 (6H, d,  $J$  = 6.0 Hz, CH<sub>3</sub>), 1.48 (6H, d,  $J$  = 6.0 Hz, CH<sub>3</sub>), 4.91-4.98 (1H, m, CH), 5.31-5.38 (1H, m, CH), 7.42 (2H, d,  $J$  = 8.4 Hz, Ar), 7.87 (2H, d,  $J$  = 8.4 Hz, Ar). <sup>13</sup>C NMR (CDCl<sub>3</sub>, 100 MHz):  $\delta$  21.2, 21.5, 75.1, 76.8, 110.7, 128.4, 129.2, 129.9, 137.2, 138.0, 148.5, 155.9. MS (ESI)  $m/z$  352.0 (M<sup>+</sup>+1), 373.9 (M<sup>+</sup>+Na). HRMS (ESI) Calcd. for C<sub>16</sub>H<sub>18</sub>ClN<sub>3</sub>O<sub>4</sub> requires (M<sup>+</sup>+Na) 374.0878 Found 374.08694.

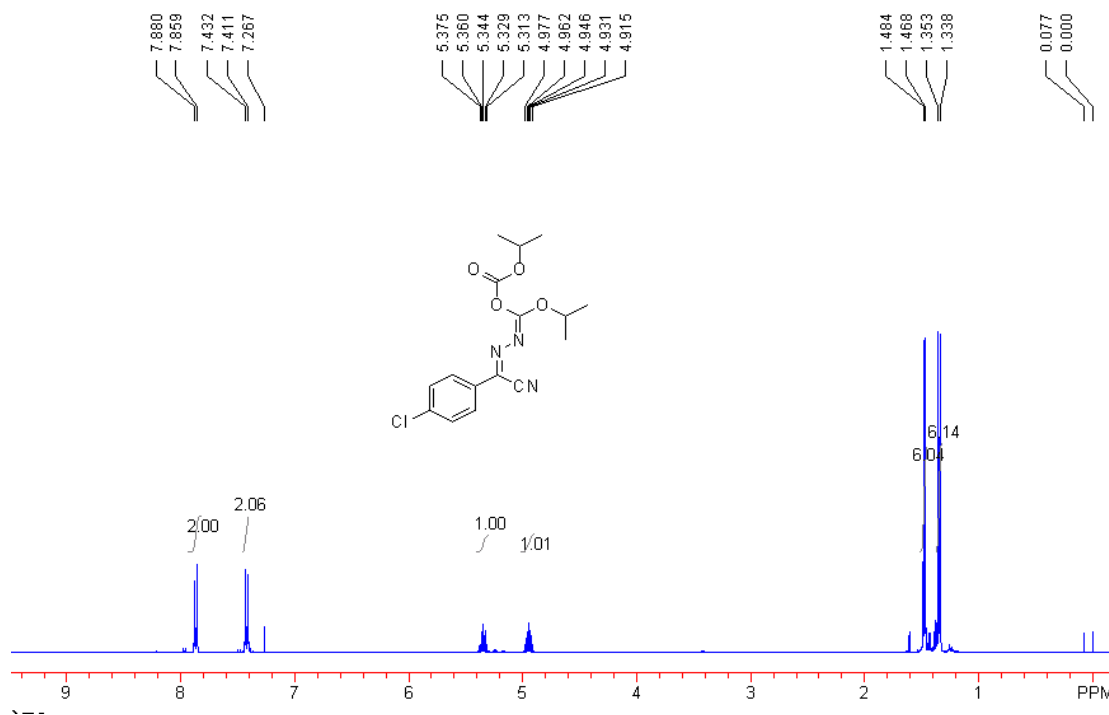

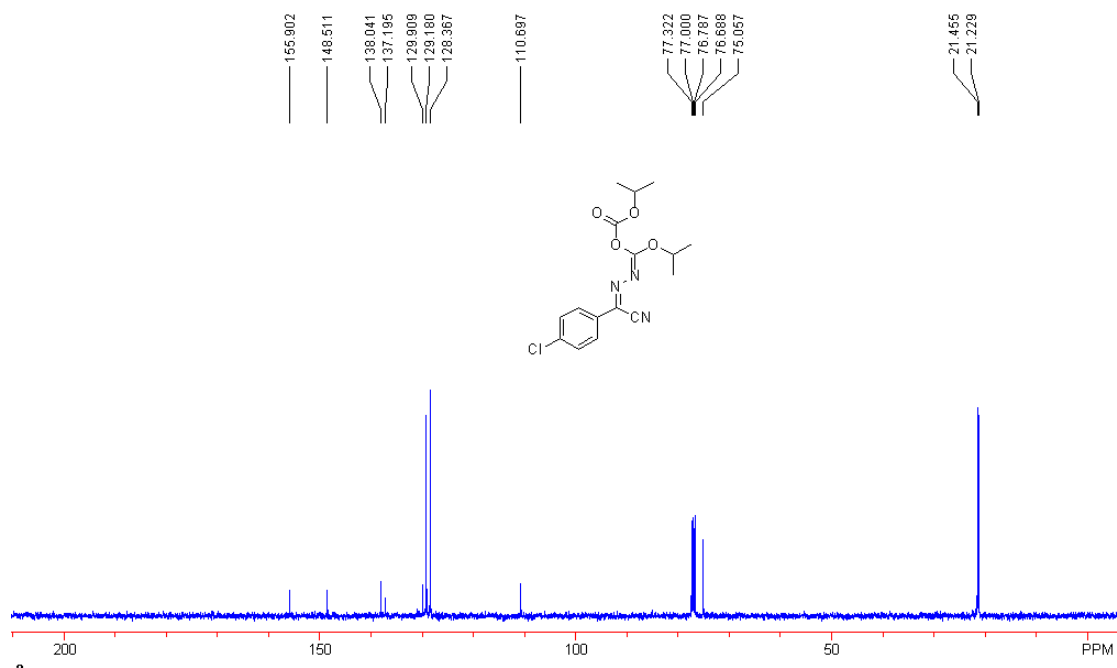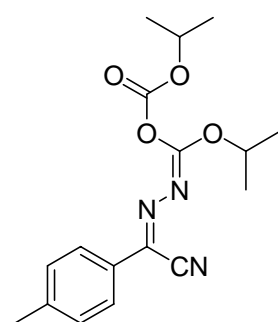

**(4d)** Oil. IR (CH<sub>2</sub>Cl<sub>2</sub>)  $\nu$  2986, 2940, 2879, 2225, 1782, 1627, 1377, 1095 cm<sup>-1</sup>; <sup>1</sup>H NMR (CDCl<sub>3</sub>, 400 MHz, TMS):  $\delta$  1.34 (6H, d,  $J$  = 6.4 Hz, CH<sub>3</sub>), 1.47 (6H, d,  $J$  = 6.4 Hz, CH<sub>3</sub>), 2.40 (3H, s, CH<sub>3</sub>), 4.91-4.98 (1H, m, CH), 5.30-5.37 (1H, m, CH), 7.24 (2H, d,  $J$  = 8.0 Hz, Ar), 7.82 (2H, d,  $J$  = 8.0 Hz, Ar). <sup>13</sup>C NMR (CDCl<sub>3</sub>, 100 MHz, TMS):  $\delta$  21.2, 21.4, 21.5, 74.9, 76.4, 111.0, 127.2, 128.7, 129.5, 138.4, 142.5, 148.6, 155.3. MS (ESI)  $m/z$  332.0 (M<sup>+</sup>+1), 354.0 (M<sup>+</sup>+Na). HRMS (ESI) Calcd. for C<sub>17</sub>H<sub>21</sub>N<sub>3</sub>O<sub>4</sub> requires (M<sup>+</sup>+Na) 354.1424 Found 354.14211.

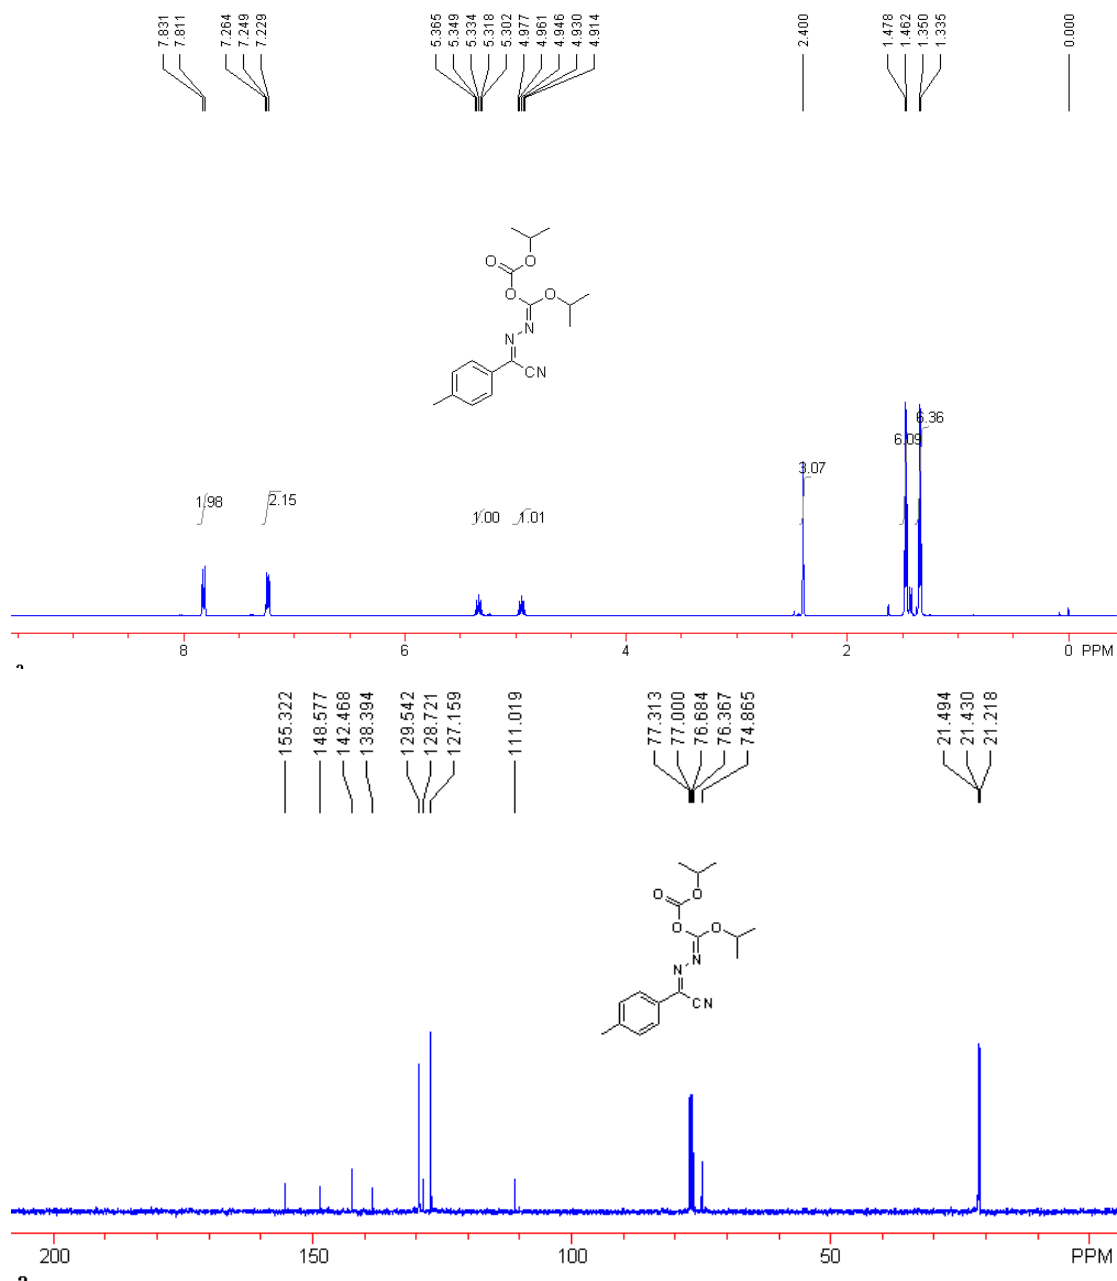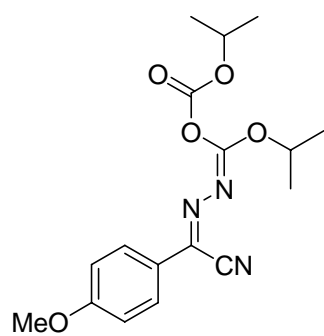

**(4e)** mp. 75-77 °C; IR (CH<sub>2</sub>Cl<sub>2</sub>) ν 2986, 1939, 2225, 1783, 1627, 1214, 1095 cm<sup>-1</sup>; <sup>1</sup>H NMR (benzene-*d*<sub>6</sub>, 400 MHz, TMS): δ 0.96 (6H, d, *J* = 6.0 Hz, CH<sub>3</sub>), 1.14 (6H, d, *J* = 6.0 Hz, CH<sub>3</sub>),

3.23 (3H, s, OCH<sub>3</sub>), 4.67-4.74 (1H, m, CH), 5.16-5.23 (1H, m, CH), 6.61 (2H, d, *J* = 8.8 Hz, Ar), 7.94 (2H, d, *J* = 8.8 Hz, Ar). <sup>13</sup>C NMR (benzene-d<sub>6</sub>, 100 MHz): δ 21.0, 21.2, 54.9, 74.6, 76.4, 111.6, 114.6, 124.7, 129.3, 138.7, 149.2, 155.8, 162.9. MS (ESI) *m/z* 348.1 (M<sup>+</sup>+1). HRMS (ESI) Calcd. for C<sub>17</sub>H<sub>21</sub>N<sub>3</sub>O<sub>5</sub> requires (M<sup>+</sup>+Na) 370.1373 Found 370.13749.

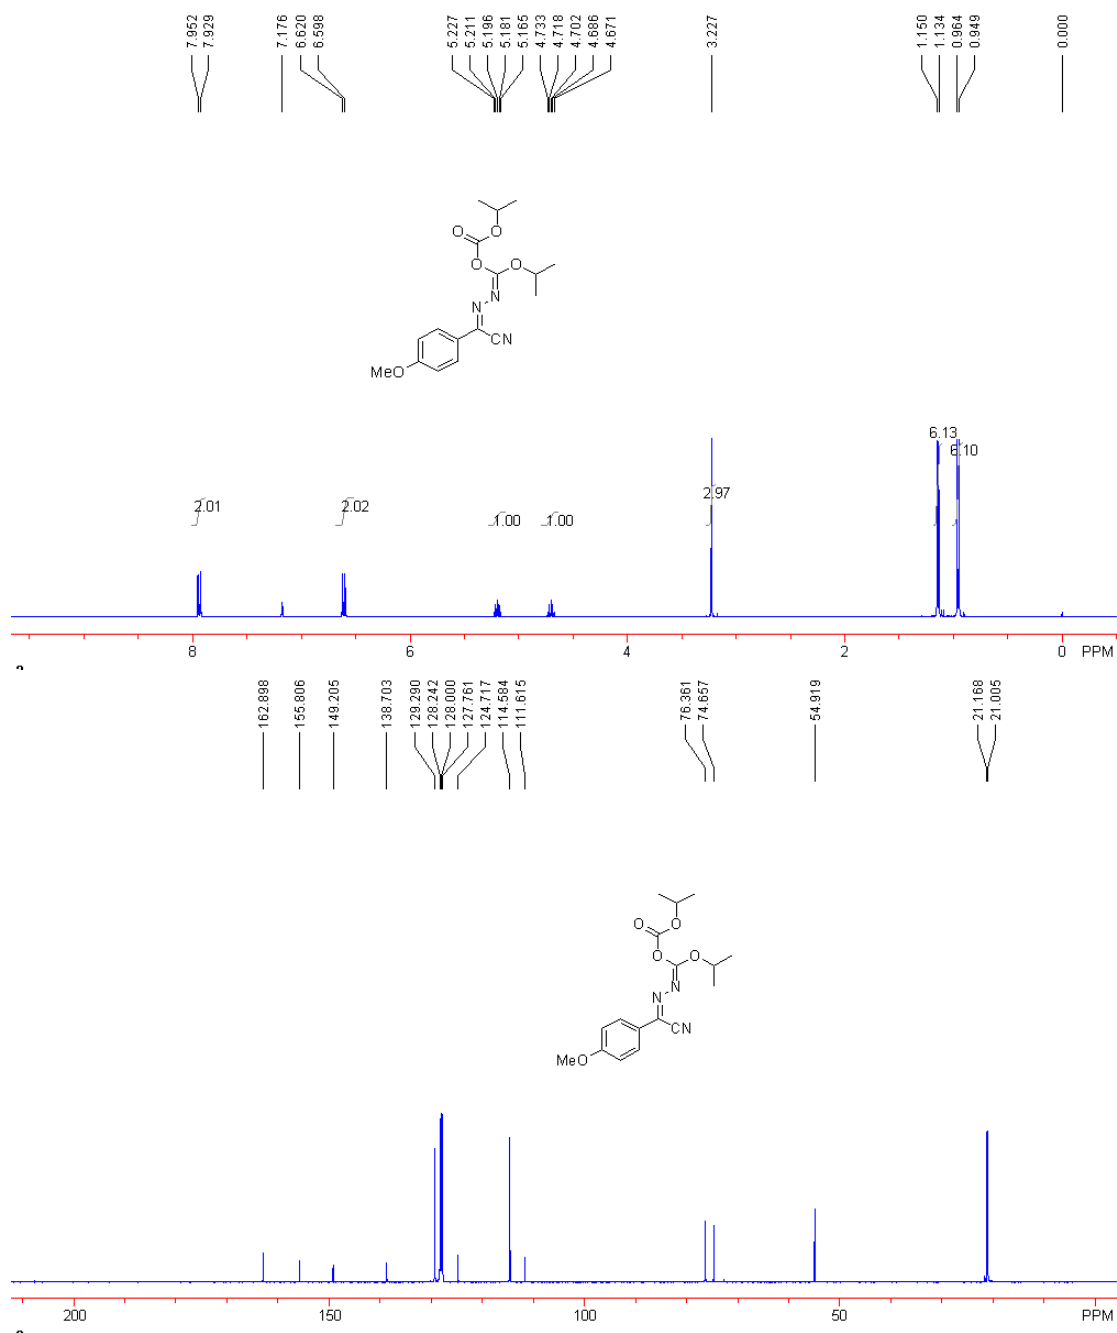

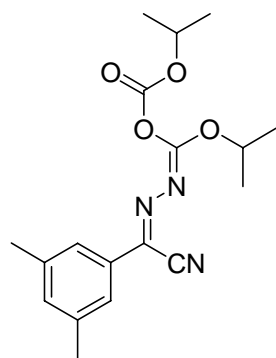

(4f) Oil. IR (CH<sub>2</sub>Cl<sub>2</sub>)  $\nu$  2986, 2939, 2225, 1782, 1627, 1207, 1086 cm<sup>-1</sup>; <sup>1</sup>H NMR (CDCl<sub>3</sub>, 300 MHz, TMS):  $\delta$  1.36 (6H, d,  $J$  = 6.0 Hz, CH<sub>3</sub>), 1.48 (6H, d,  $J$  = 6.0 Hz, CH<sub>3</sub>), 2.35 (6H, s, CH<sub>3</sub>), 4.92-5.01 (1H, m, CH), 5.29-5.39 (1H, m, CH), 7.12 (1H, s, Ar), 7.55 (2H, s, Ar). <sup>13</sup>C NMR (CDCl<sub>3</sub>, 75 MHz):  $\delta$  21.1, 21.2, 21.4, 74.8, 76.4, 111.1, 125.0, 131.2, 133.6, 138.5, 138.7, 148.6, 155.3. MS (ESI)  $m/z$  346.0 (M<sup>+</sup>+1), 368.0 (M<sup>+</sup>+Na). HRMS (ESI) Calcd. for C<sub>18</sub>H<sub>23</sub>N<sub>3</sub>O<sub>4</sub> requires (M<sup>+</sup>+Na) 368.1581 Found 368.15692.

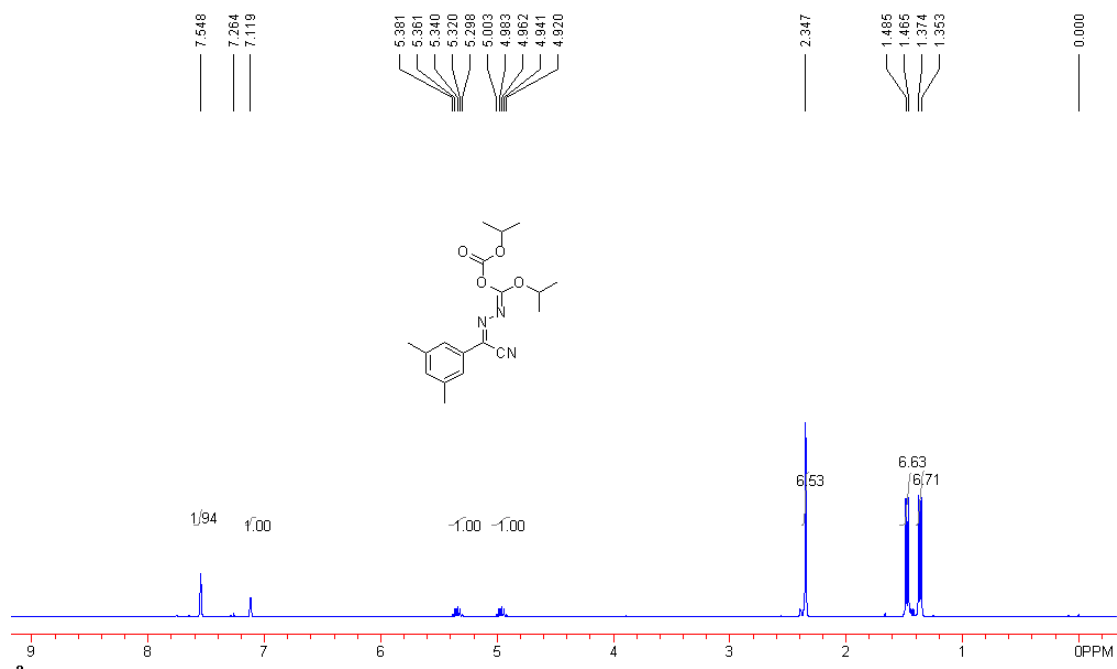

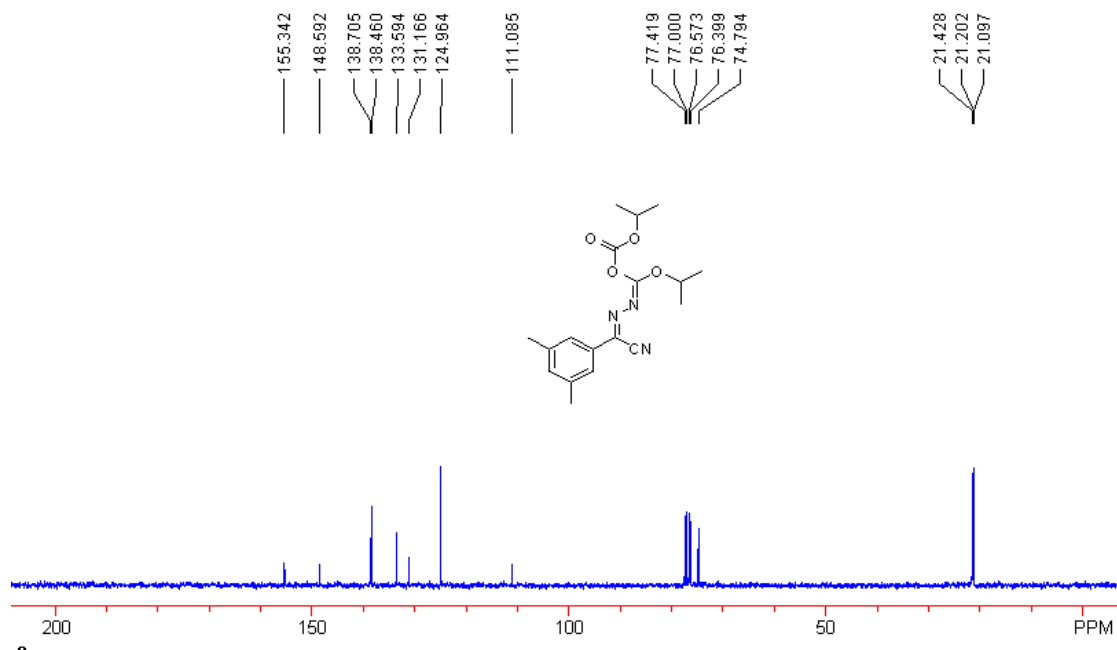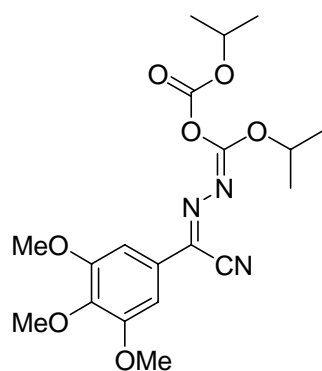

(**4g**) Oil. IR (CH<sub>2</sub>Cl<sub>2</sub>)  $\nu$  2986, 2942, 2842, 2226, 1784, 1628, 1590, 1212, 1096 cm<sup>-1</sup>; <sup>1</sup>H NMR (CDCl<sub>3</sub>, 400 MHz, TMS):  $\delta$  1.31 (6H, d,  $J$  = 6.4 Hz, CH<sub>3</sub>), 1.48 (6H, d,  $J$  = 6.0 Hz, CH<sub>3</sub>), 3.92 (9H, s, OCH<sub>3</sub>), 4.90-4.97 (1H, m, CH), 5.30-5.37 (1H, m, CH), 7.19 (2H, s, Ar). <sup>13</sup>C NMR (CDCl<sub>3</sub>, 100 MHz):  $\delta$  21.2, 21.4, 56.2, 61.0, 74.9, 76.5, 104.4, 110.9, 126.6, 138.0, 141.4, 148.4, 153.4, 155.2. MS (ESI)  $m/z$  407.9 (M<sup>+</sup>+1), 429.9 (M<sup>+</sup>+Na). HRMS (ESI) Calcd. for C<sub>19</sub>H<sub>25</sub>N<sub>3</sub>O<sub>7</sub> requires (M<sup>+</sup>+Na) 430.1585 Found 430.15792.



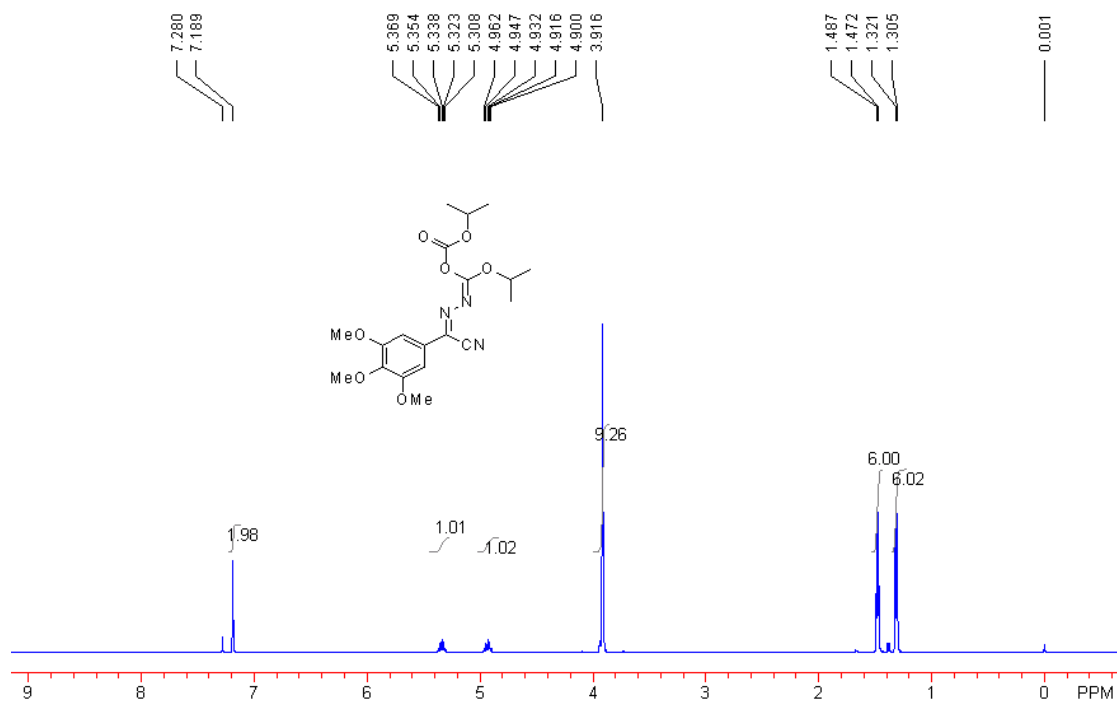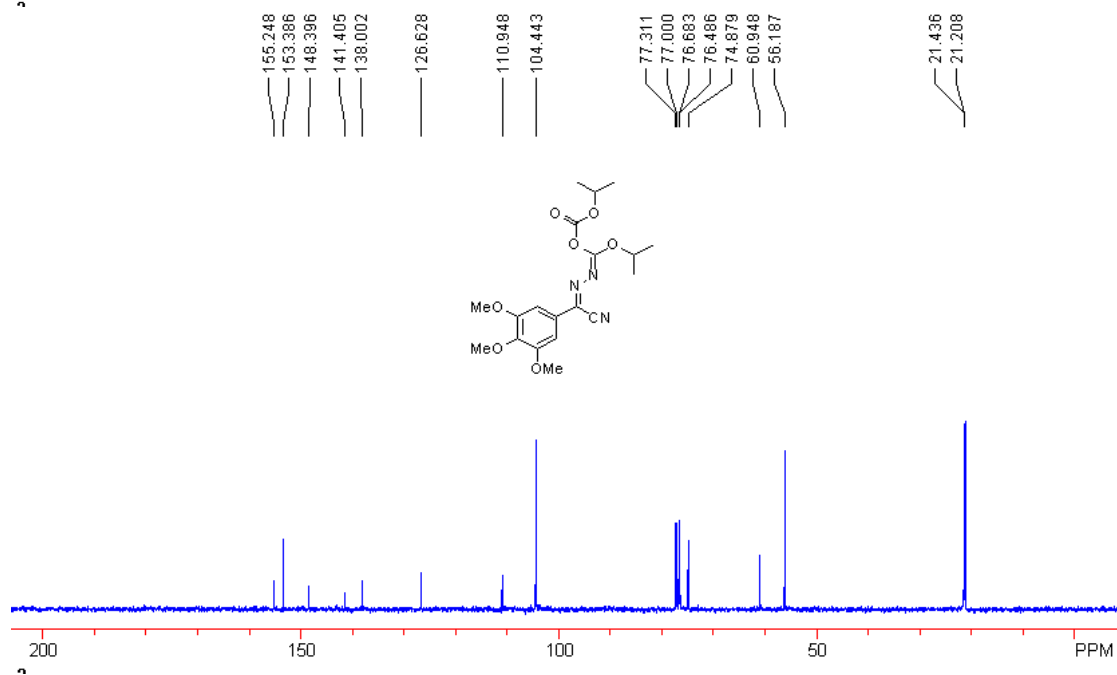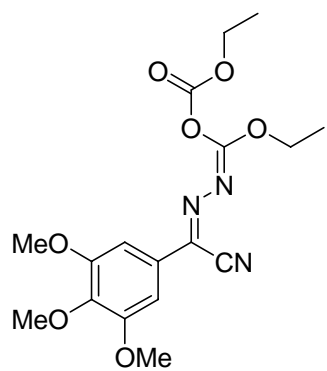

**(4h)** Oil. IR (CH<sub>2</sub>Cl<sub>2</sub>)  $\nu$  2985, 2942, 2842, 2227, 1789, 1633, 1590, 1206 cm<sup>-1</sup>; <sup>1</sup>H NMR (CDCl<sub>3</sub>, 400 MHz, TMS):  $\delta$  1.33 (3H, t,  $J = 7.2$  Hz, CH<sub>3</sub>), 1.48 (3H, t,  $J = 7.2$  Hz, CH<sub>3</sub>), 3.91 (3H, s, OCH<sub>3</sub>), 3.92 (6H, s, OCH<sub>3</sub>), 4.31 (2H, q,  $J = 7.2$  Hz, CH<sub>2</sub>), 4.57 (2H, q,  $J = 7.2$  Hz, CH), 7.19 (2H, s, Ar). <sup>13</sup>C NMR (CDCl<sub>3</sub>, 100 MHz, TMS):  $\delta$  13.8, 14.0, 56.2, 61.0, 66.2, 68.0, 104.4, 110.8, 126.5, 138.4, 141.5, 148.9, 153.4, 155.9. MS (ESI)  $m/z$  380.0 (M<sup>+</sup>+1). HRMS (ESI) Calcd. for C<sub>17</sub>H<sub>21</sub>N<sub>3</sub>O<sub>7</sub> requires (M<sup>+</sup>+Na) 402.1272 Found 402.12674.

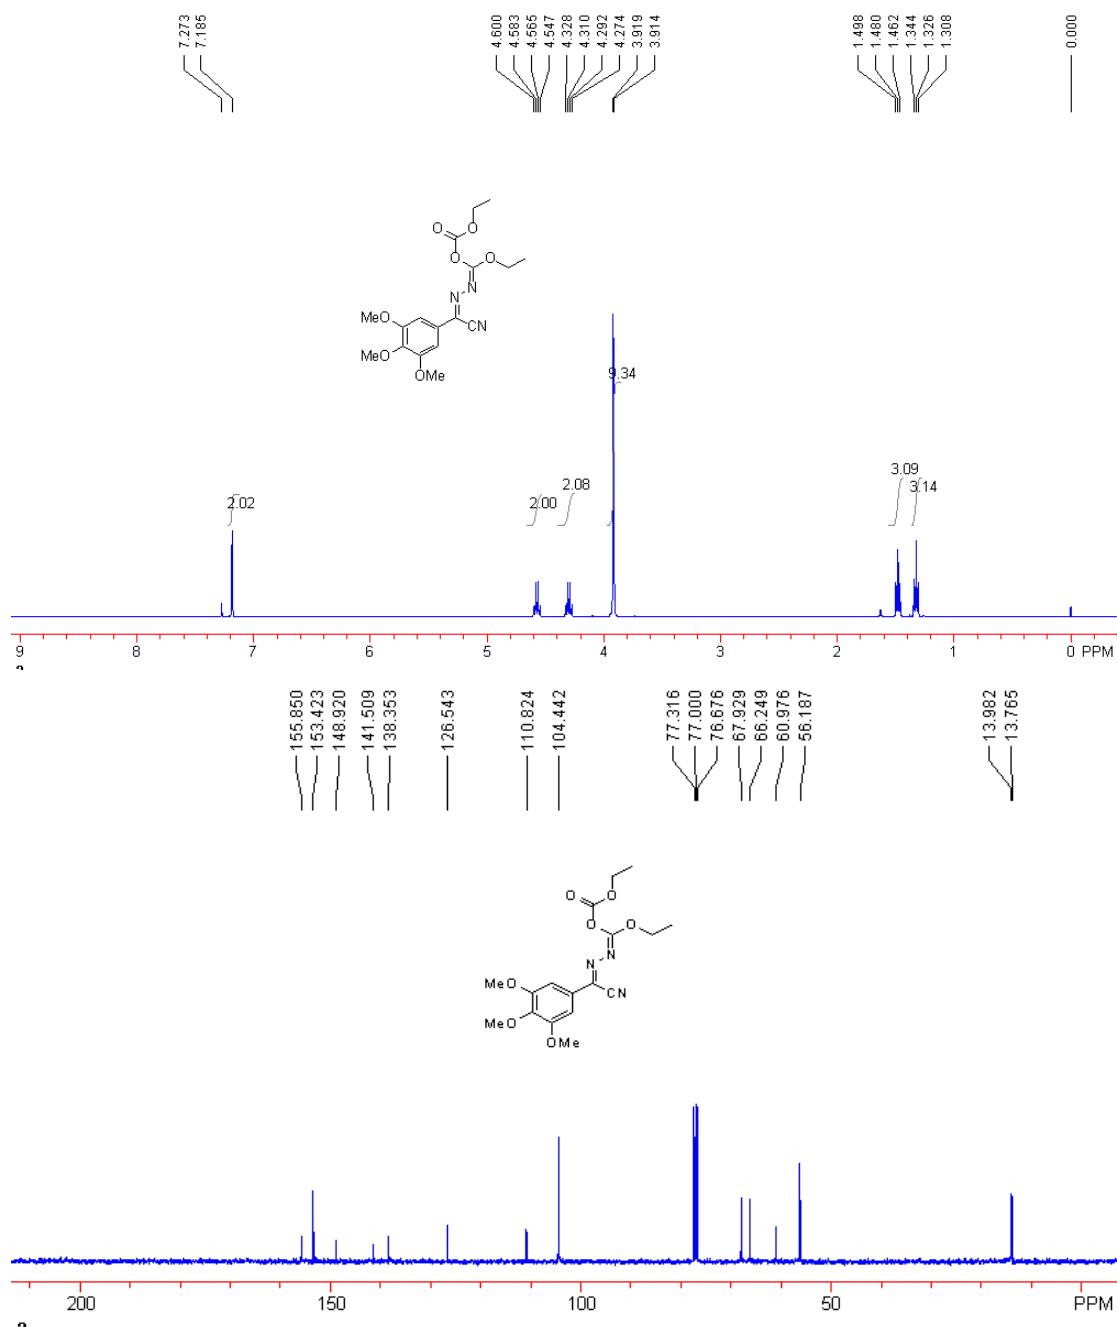

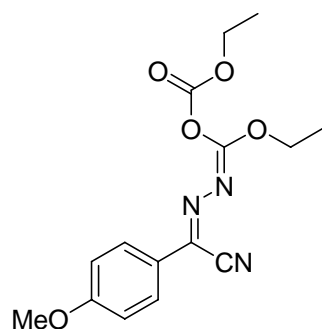

(4i) Oil. IR (CH<sub>2</sub>Cl<sub>2</sub>)  $\nu$  2985, 2940, 2842, 2225, 1785, 1630, 1604, 1261, 1205 cm<sup>-1</sup>; <sup>1</sup>H NMR (CDCl<sub>3</sub>, 400 MHz, TMS):  $\delta$  1.35 (3H, t,  $J = 7.2$  Hz, CH<sub>3</sub>), 1.46 (3H, t,  $J = 7.2$  Hz, CH<sub>3</sub>), 3.86 (3H, s, OCH<sub>3</sub>), 4.32 (2H, q,  $J = 7.2$  Hz, CH<sub>2</sub>), 4.55 (2H, q,  $J = 7.2$  Hz, CH), 6.95 (2H, d,  $J = 9.2$  Hz, Ar), 7.87 (2H, d,  $J = 9.2$  Hz, Ar). <sup>13</sup>C NMR (CDCl<sub>3</sub>, 100 MHz, TMS):  $\delta$  13.7, 14.0, 55.5, 66.2, 67.7, 111.0, 114.3, 124.0, 129.0, 138.5, 149.1, 155.4, 162.7. MS (ESI)  $m/z$  320.0 (M<sup>+</sup>+1), 341.9 (M<sup>+</sup>+Na). HRMS (ESI) Calcd. for C<sub>15</sub>H<sub>17</sub>N<sub>3</sub>O<sub>5</sub> requires (M<sup>+</sup>+Na) 342.1060 Found 342.10585.

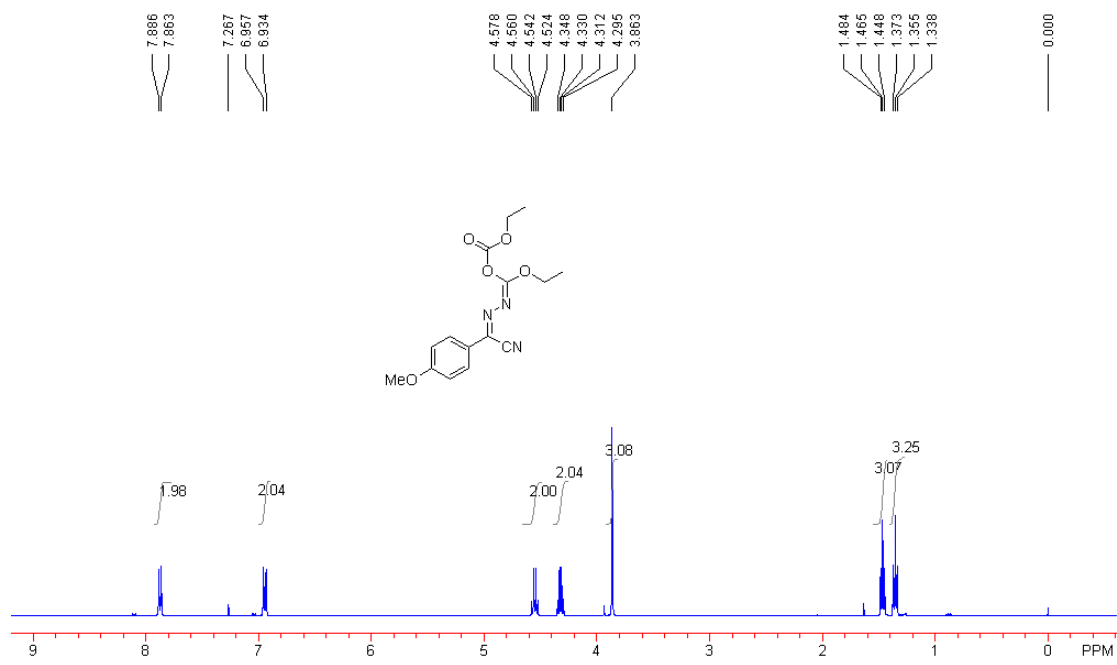



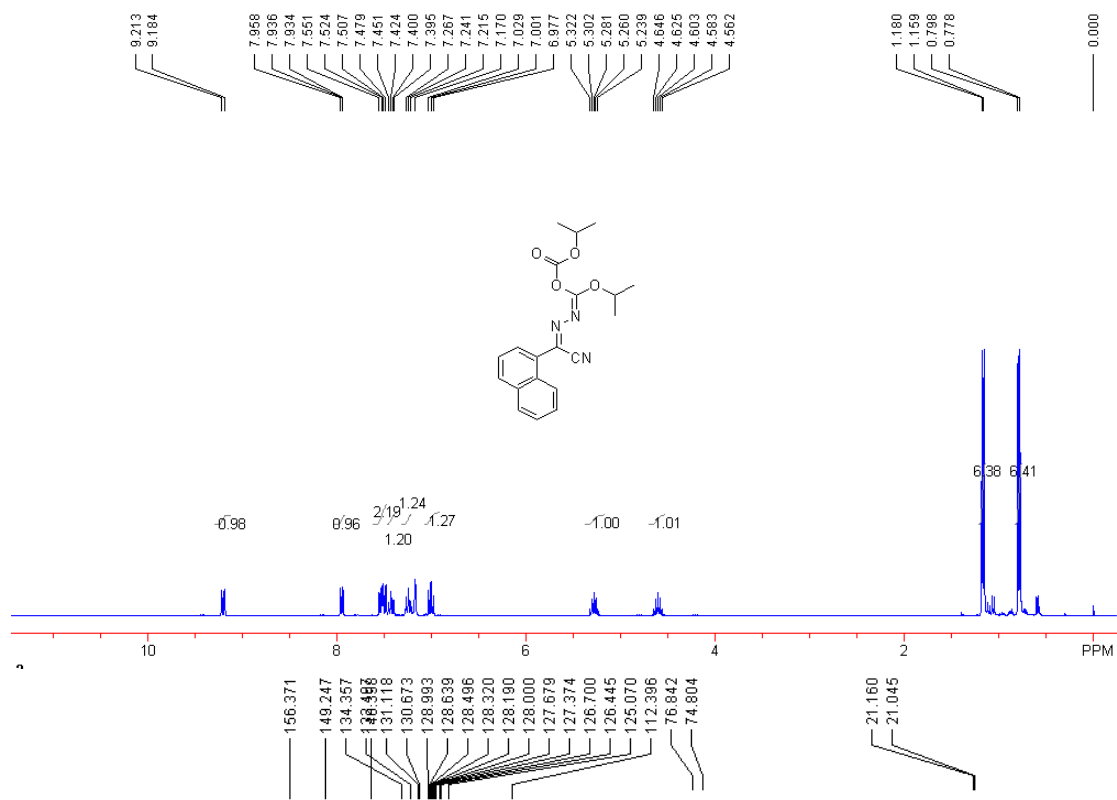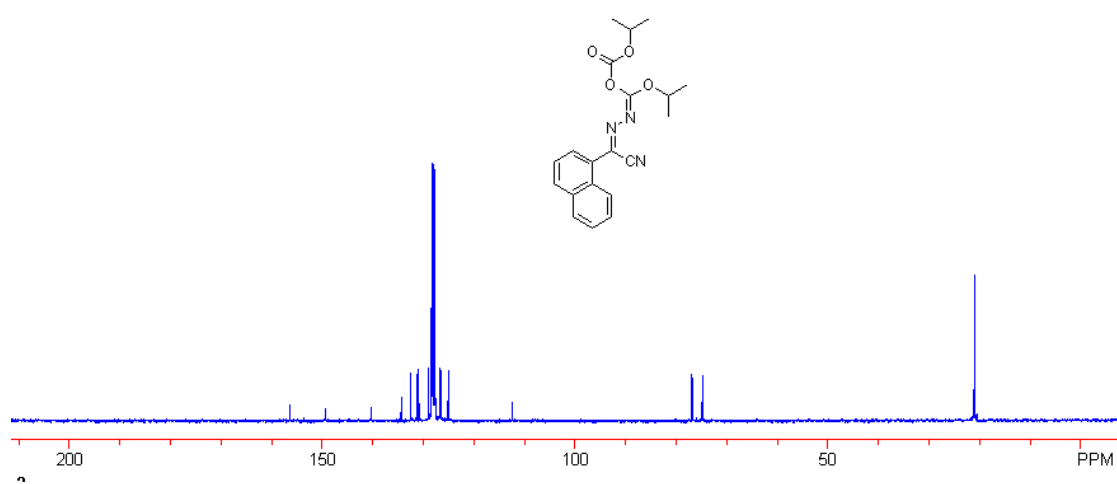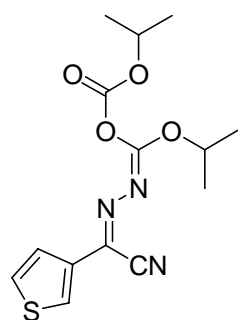

**(4k)** Oil. IR (CH<sub>2</sub>Cl<sub>2</sub>)  $\nu$  3105, 2986, 2940, 2227, 1783, 1626, 1218, 1095 cm<sup>-1</sup>; <sup>1</sup>H NMR

(CDCl<sub>3</sub>, 400 MHz, TMS):  $\delta$  1.34 (6H, d,  $J = 6.4$  Hz, CH<sub>3</sub>), 1.46 (6H, d,  $J = 6.0$  Hz, CH<sub>3</sub>), 4.91-4.98 (1H, m, CH), 5.28-5.35 (1H, m, CH), 7.36 (1H, dd,  $J_1 = 2.8$  Hz,  $J_2 = 4.8$  Hz, Ar), 7.52 (1H, dd,  $J_1 = 1.2$  Hz,  $J_2 = 4.8$  Hz, Ar), 7.90 (1H, dd,  $J_1 = 1.2$  Hz,  $J_2 = 2.8$  Hz, Ar). <sup>13</sup>C NMR (CDCl<sub>3</sub>, 100 MHz, TMS):  $\delta$  21.2, 21.4, 74.9, 76.4, 111.2, 124.9, 127.4, 129.2, 133.8, 134.9, 148.5, 155.2. MS (ESI)  $m/z$  323.9 (M<sup>+</sup>+1), 345.9 (M<sup>+</sup>+Na). HRMS (ESI) Calcd. for C<sub>14</sub>H<sub>17</sub>N<sub>3</sub>O<sub>4</sub>S requires (M<sup>+</sup>+Na) 346.0832 Found 346.08309.

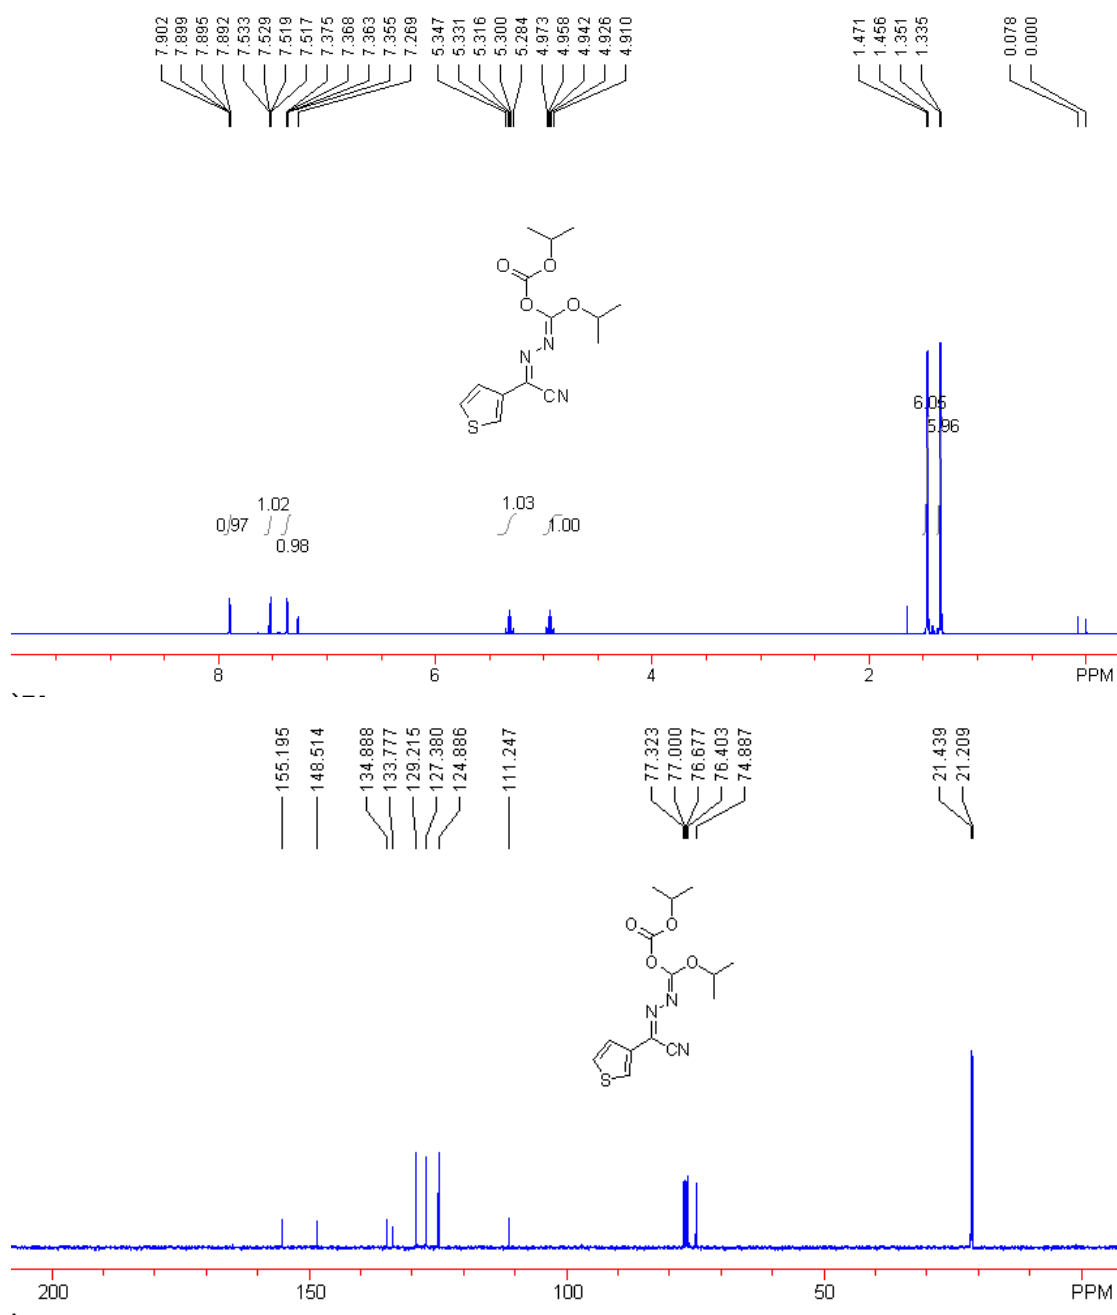

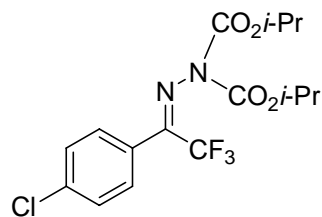

**(Z)-diisopropyl**

**2-(1-(4-chlorophenyl)-2,2,2-trifluoroethylidene)hydrazine-1,1-dicarboxylate (6).** Oil. IR (CH<sub>2</sub>Cl<sub>2</sub>)  $\nu$  2986, 2941, 1752, 1594, 1281, 1147 cm<sup>-1</sup>; <sup>1</sup>H NMR (CDCl<sub>3</sub>, 300 MHz, TMS):  $\delta$  1.21 (12H, d,  $J$  = 6.0 Hz, CH<sub>3</sub>), 4.84-4.93 (2H, m, CH), 7.31 (2H, d,  $J$  = 8.7 Hz, Ar), 7.44 (2H, d,  $J$  = 8.7 Hz, Ar). <sup>13</sup>C NMR (CDCl<sub>3</sub>, 100 MHz):  $\delta$  21.4, 72.7, 119.7 (q,  $J$  = 275.8 Hz), 126.7, 129.1, 137.4, 150.3, 158.0 (q,  $J$  = 33.5 Hz). <sup>19</sup>F NMR (CDCl<sub>3</sub>, 282 MHz):  $\delta$  -73.94. MS (ESI)  $m/z$  395.2 (M<sup>+</sup>+1). HRMS (MALDI) Calcd. for C<sub>16</sub>H<sub>18</sub>ClF<sub>3</sub>N<sub>2</sub>O<sub>4</sub> requires (M<sup>+</sup>+Na) 417.0811 Found 417.07994.

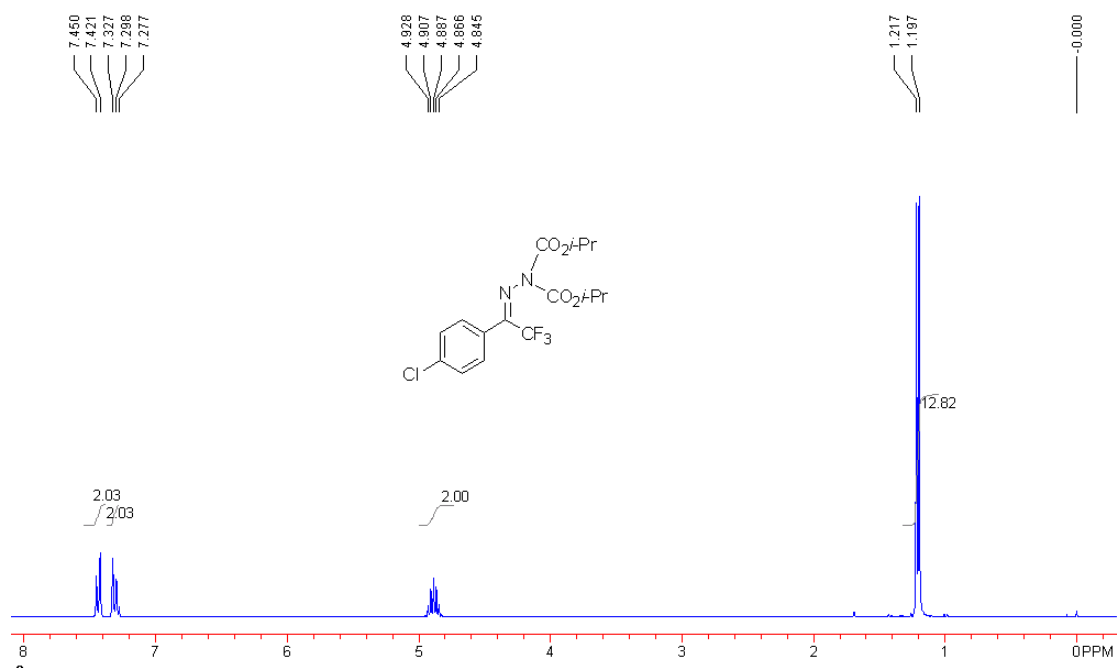

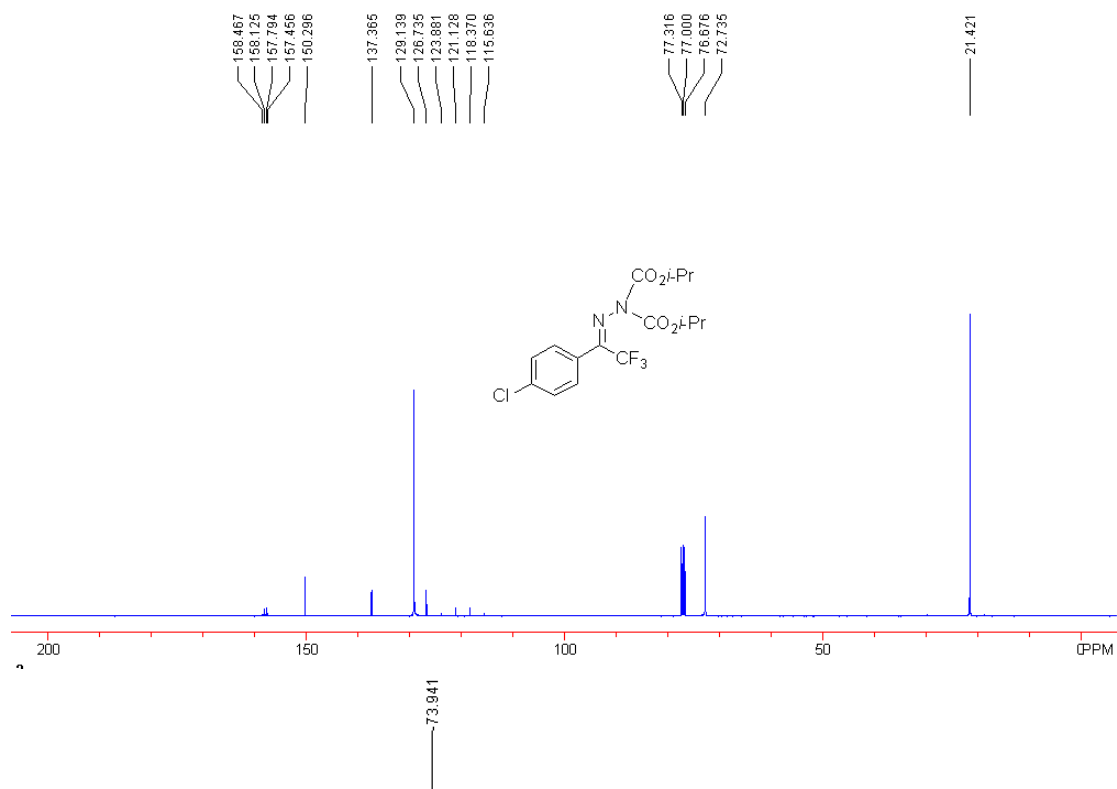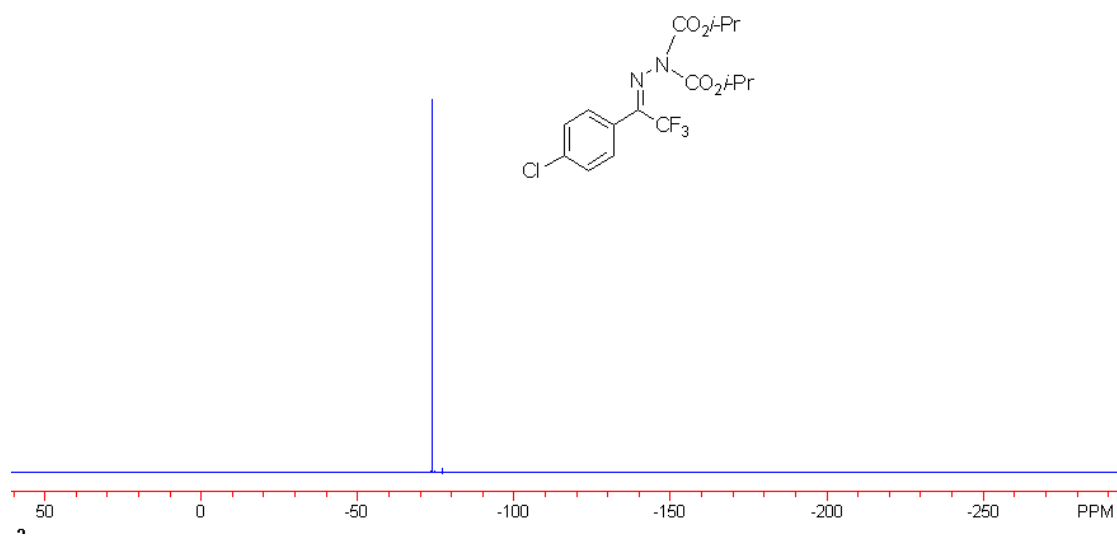



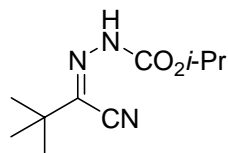

**(Z)-isopropyl 2-(1-cyano-2,2-dimethylpropylidene)hydrazinecarboxylate (7).** Oil. IR (CH<sub>2</sub>Cl<sub>2</sub>)  $\nu$  3226, 2979, 2211, 1760, 1513, 1222, 1108 cm<sup>-1</sup>; <sup>1</sup>H NMR (CDCl<sub>3</sub>, 400 MHz, TMS):  $\delta$  1.27 (9H, s, CH<sub>3</sub>), 1.32 (6H, d,  $J$  = 6.0 Hz, CH<sub>3</sub>), 5.04-5.11 (1H, m, CH), 8.52 (1H, s, NH). <sup>13</sup>C NMR (CDCl<sub>3</sub>, 100 MHz):  $\delta$  21.9, 27.4, 36.7, 70.8, 109.5, 132.1, 151.7. MS (ESI)  $m/z$  212.1 (M<sup>+</sup>+1). HRMS (EI) Calcd. for C<sub>10</sub>H<sub>17</sub>N<sub>3</sub>O<sub>2</sub> requires (M<sup>+</sup>) 211.1321, Found 211.1321.

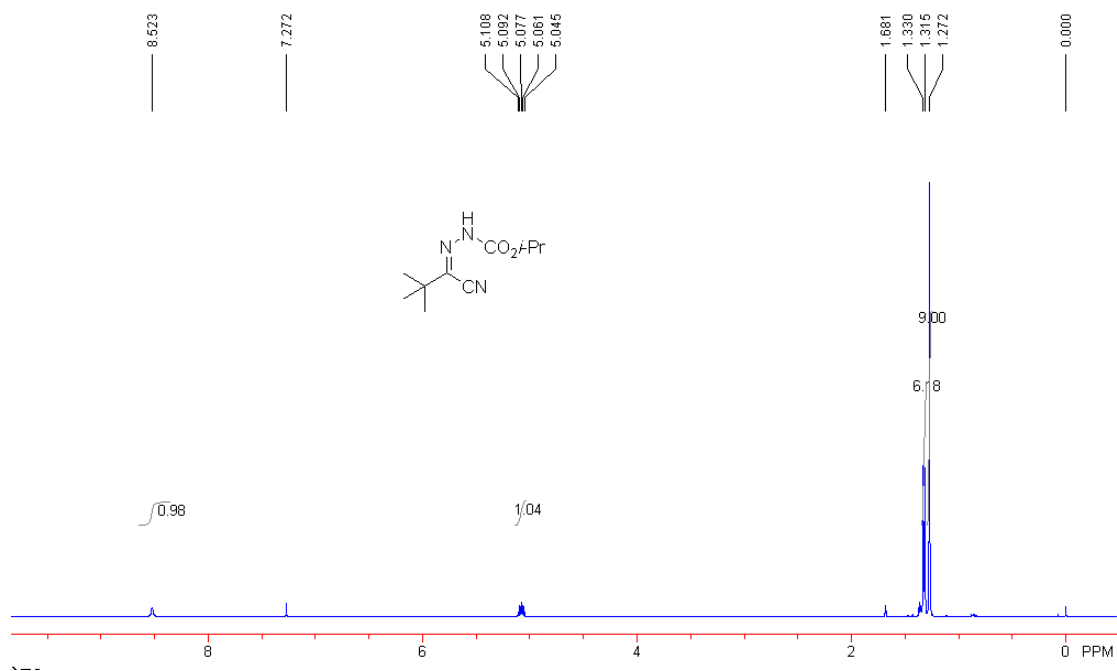

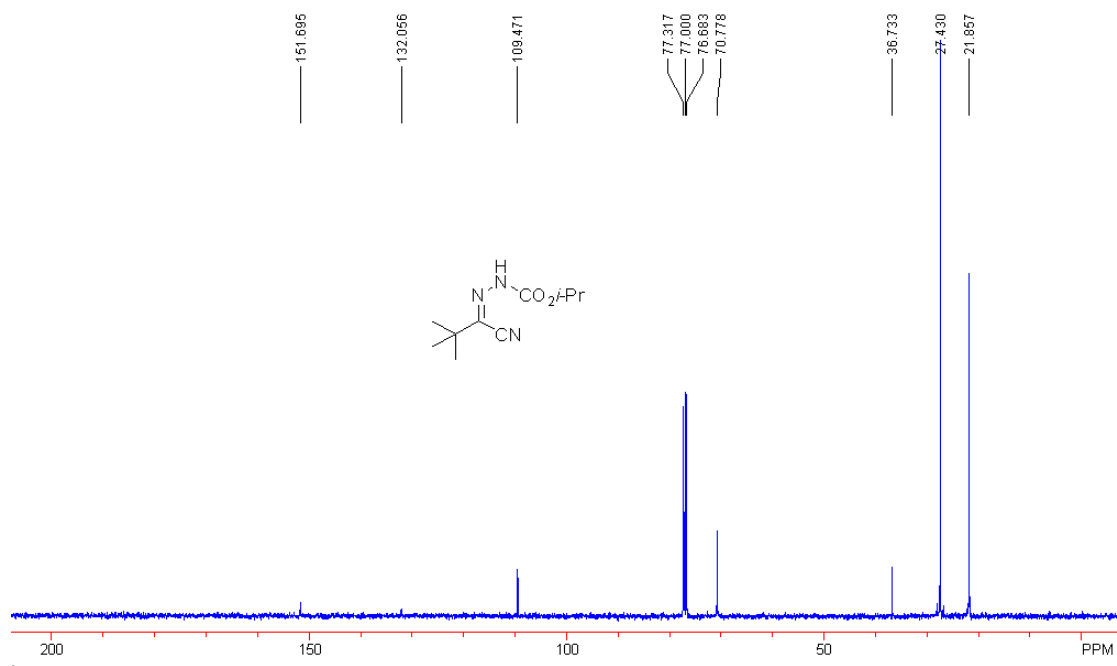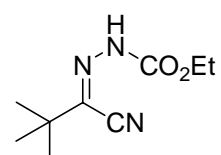

**(Z)-Ethyl 2-(1-cyano-2,2-dimethylpropylidene)hydrazinecarboxylate (8).** Oil. IR (CH<sub>2</sub>Cl<sub>2</sub>)  $\nu$  3239, 2971, 2211, 1766, 1514, 1216, 1031 cm<sup>-1</sup>; <sup>1</sup>H NMR (CDCl<sub>3</sub>, 400 MHz, TMS):  $\delta$  1.27 (9H, s, CH<sub>3</sub>), 1.34 (3H, t,  $J = 7.2$  Hz, CH<sub>3</sub>), 4.31 (2H, q,  $J = 7.2$  Hz, CH), 8.54 (1H, s, NH). <sup>13</sup>C NMR (CDCl<sub>3</sub>, 100 MHz):  $\delta$  14.4, 27.4, 36.8, 62.7, 109.4, 132.3, 152.2. MS (ESI)  $m/z$  198.1 (M<sup>+</sup>+1). HRMS (EI) Calcd. for C<sub>9</sub>H<sub>15</sub>N<sub>3</sub>O<sub>2</sub> requires (M<sup>+</sup>) 197.1164, Found 197.1168.

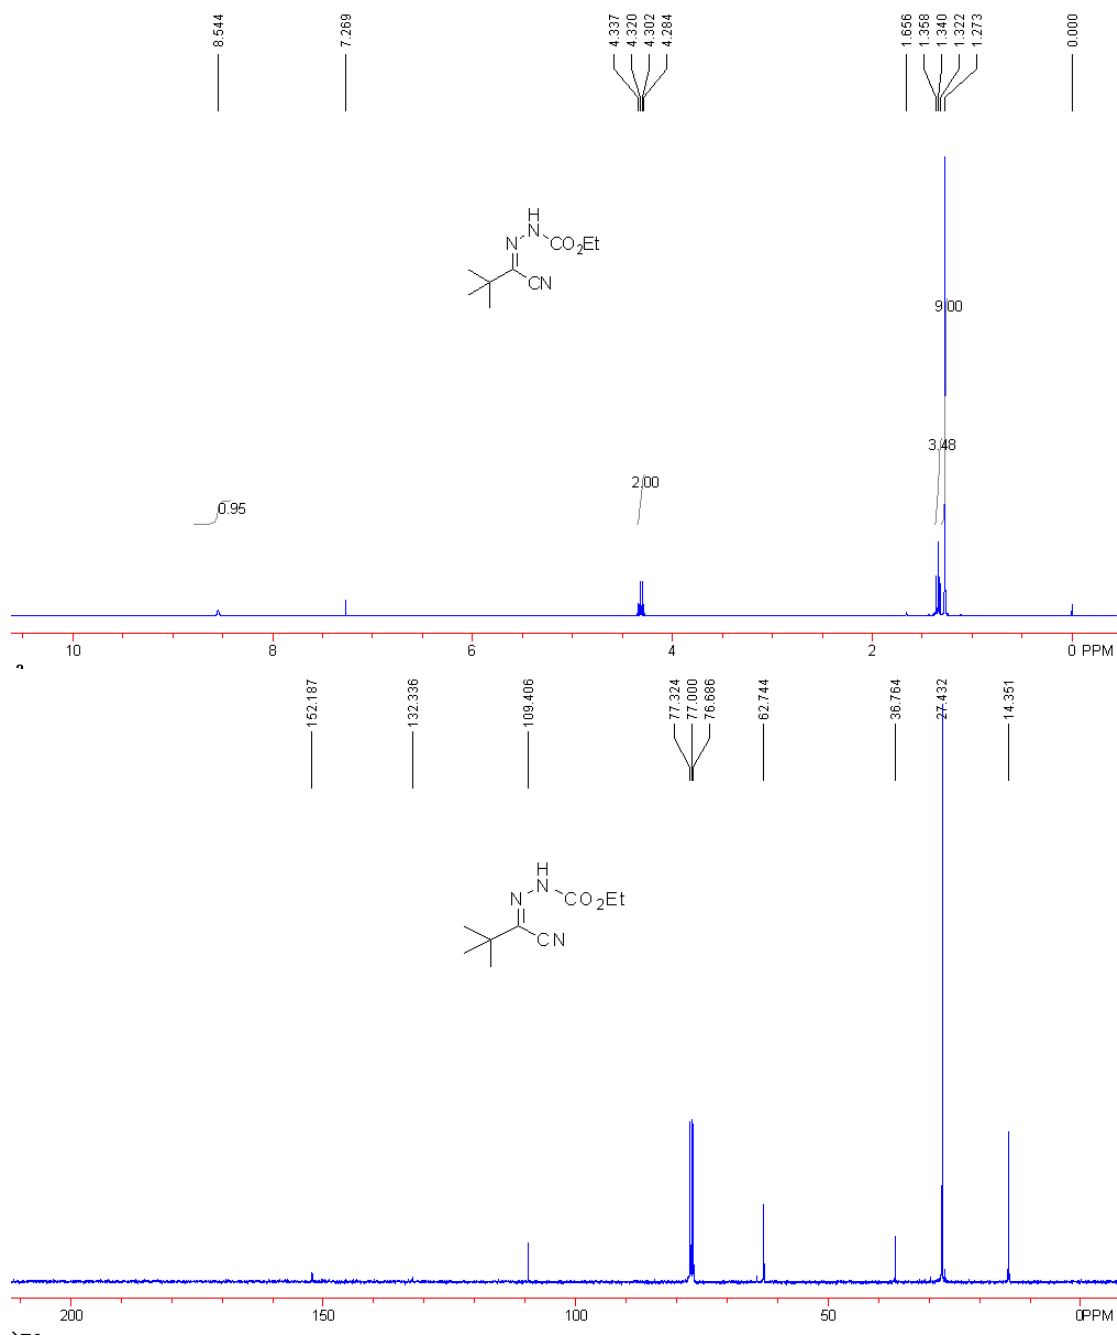

X-ray crystal structure compound **3c**

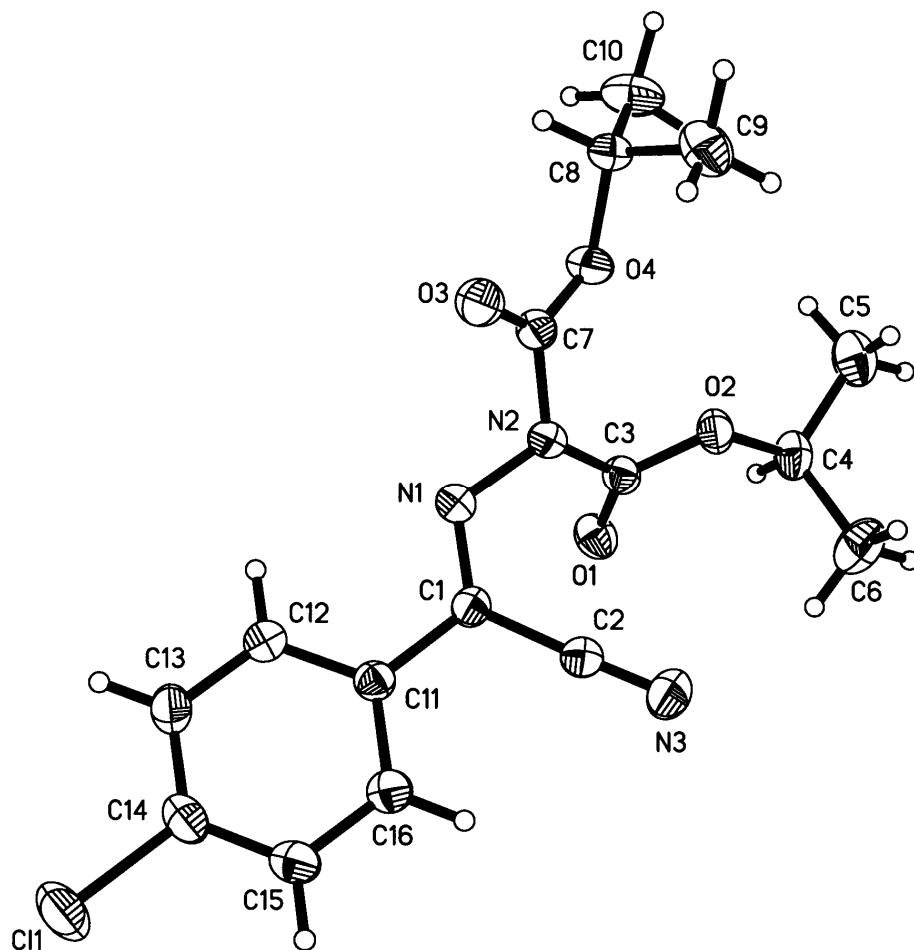

The crystal data of **3c** have been deposited in CCDC with number 713523. Empirical Formula:  $C_{16}H_{18}ClN_3O_4$ ; Formula Weight: 351.78; Crystal Color, Habit: colorless, prismatic; Crystal System: Monoclinic; Lattice Type: Primitive; Unit cell dimension: 0.378 x 0.346 x 0.267 mm; Lattice Parameters:  $a = 10.8230(18)\text{\AA}$ ,  $b = 6.4408(11)\text{\AA}$ ,  $c = 25.686(4)\text{\AA}$ ,  $\alpha = 90^\circ$ ,  $\beta = 100.893(3)^\circ$ ,  $\gamma = 90^\circ$ ,  $V = 1758.3(5)\text{\AA}^3$ ; Space group:  $P2(1)/c$ ;  $Z = 4$ ;  $D_{calc} = 1.329\text{ g/cm}^3$ ;  $F_{000} = 736$ ; Diffractometer: Rigaku AFC7R; Residuals: R;  $R_w = 0.0457, 0.1049$ .

Table 1. Crystal data and structure refinement for cd28573.

|                                   |                                                                                                                          |
|-----------------------------------|--------------------------------------------------------------------------------------------------------------------------|
| Identification code               | cd28573                                                                                                                  |
| Empirical formula                 | C16 H18 Cl N3 O4                                                                                                         |
| Formula weight                    | 351.78                                                                                                                   |
| Temperature                       | 293(2) K                                                                                                                 |
| Wavelength                        | 0.71073 Å                                                                                                                |
| Crystal system, space group       | Monoclinic, P2(1)/c                                                                                                      |
| Unit cell dimensions              | a = 10.8230(18) Å    alpha = 90 deg.<br>b = 6.4408(11) Å    beta = 100.893(3) deg.<br>c = 25.686(4) Å    gamma = 90 deg. |
| Volume                            | 1758.3(5) Å <sup>3</sup>                                                                                                 |
| Z, Calculated density             | 4, 1.329 Mg/m <sup>3</sup>                                                                                               |
| Absorption coefficient            | 0.242 mm <sup>-1</sup>                                                                                                   |
| F(000)                            | 736                                                                                                                      |
| Crystal size                      | 0.378 x 0.346 x 0.267 mm                                                                                                 |
| Theta range for data collection   | 1.61 to 25.99 deg.                                                                                                       |
| Limiting indices                  | -13<=h<=13, -7<=k<=7, -31<=l<=23                                                                                         |
| Reflections collected / unique    | 9077 / 3434 [R(int) = 0.0647]                                                                                            |
| Completeness to theta = 25.99     | 99.7 %                                                                                                                   |
| Absorption correction             | Empirical                                                                                                                |
| Max. and min. transmission        | 1.0000 and 0.7534                                                                                                        |
| Refinement method                 | Full-matrix least-squares on F <sup>2</sup>                                                                              |
| Data / restraints / parameters    | 3434 / 0 / 222                                                                                                           |
| Goodness-of-fit on F <sup>2</sup> | 0.950                                                                                                                    |
| Final R indices [I>2sigma(I)]     | R1 = 0.0457, wR2 = 0.1049                                                                                                |
| R indices (all data)              | R1 = 0.0695, wR2 = 0.1144                                                                                                |
| Extinction coefficient            | 0.0010(10)                                                                                                               |
| Largest diff. peak and hole       | 0.247 and -0.295 e.Å <sup>-3</sup>                                                                                       |

Table 2. Atomic coordinates ( $\times 10^4$ ) and equivalent isotropic displacement parameters ( $\text{\AA}^2 \times 10^3$ ) for cd28573. U(eq) is defined as one third of the trace of the orthogonalized Uij tensor.

|       | x       | y        | z        | U(eq) |
|-------|---------|----------|----------|-------|
| Cl(1) | 655(1)  | 11587(1) | 11076(1) | 85(1) |
| N(1)  | 2231(1) | 4853(3)  | 9333(1)  | 47(1) |
| N(2)  | 2719(1) | 3757(3)  | 8948(1)  | 44(1) |
| N(3)  | 4617(2) | 8114(3)  | 9134(1)  | 68(1) |
| O(1)  | 4673(1) | 3234(2)  | 9459(1)  | 53(1) |
| O(2)  | 4378(1) | 3014(2)  | 8571(1)  | 50(1) |
| O(3)  | 720(1)  | 3413(2)  | 8482(1)  | 59(1) |
| O(4)  | 2208(1) | 1072(2)  | 8389(1)  | 49(1) |
| C(1)  | 2786(2) | 6520(3)  | 9516(1)  | 40(1) |
| C(2)  | 3842(2) | 7399(3)  | 9315(1)  | 46(1) |
| C(3)  | 4037(2) | 3278(3)  | 9028(1)  | 42(1) |
| C(4)  | 5692(2) | 2420(3)  | 8581(1)  | 54(1) |
| C(5)  | 5668(2) | 966(5)   | 8125(1)  | 88(1) |
| C(6)  | 6425(2) | 4358(4)  | 8542(1)  | 83(1) |
| C(7)  | 1774(2) | 2759(3)  | 8582(1)  | 44(1) |
| C(8)  | 1437(2) | 182(3)   | 7912(1)  | 51(1) |
| C(9)  | 1594(2) | 1480(4)  | 7445(1)  | 75(1) |
| C(10) | 1880(2) | -2004(4) | 7887(1)  | 79(1) |
| C(11) | 2298(2) | 7743(3)  | 9916(1)  | 40(1) |
| C(12) | 1376(2) | 6912(3)  | 10167(1) | 51(1) |
| C(13) | 871(2)  | 8080(4)  | 10524(1) | 57(1) |
| C(14) | 1287(2) | 10069(4) | 10630(1) | 53(1) |
| C(15) | 2204(2) | 10915(3) | 10392(1) | 54(1) |
| C(16) | 2713(2) | 9742(3)  | 10038(1) | 48(1) |

Table 3. Bond lengths [Å] and angles [deg] for cd28573.

|                  |            |
|------------------|------------|
| C1(1)-C(14)      | 1.741(2)   |
| N(1)-C(1)        | 1.276(2)   |
| N(1)-N(2)        | 1.396(2)   |
| N(2)-C(7)        | 1.407(2)   |
| N(2)-C(3)        | 1.436(2)   |
| N(3)-C(2)        | 1.131(2)   |
| O(1)-C(3)        | 1.188(2)   |
| O(2)-C(3)        | 1.307(2)   |
| O(2)-C(4)        | 1.468(2)   |
| O(3)-C(7)        | 1.197(2)   |
| O(4)-C(7)        | 1.318(2)   |
| O(4)-C(8)        | 1.463(2)   |
| C(1)-C(2)        | 1.455(3)   |
| C(1)-C(11)       | 1.468(2)   |
| C(4)-C(6)        | 1.493(3)   |
| C(4)-C(5)        | 1.496(3)   |
| C(4)-H(4)        | 0.9800     |
| C(5)-H(5A)       | 0.9600     |
| C(5)-H(5B)       | 0.9600     |
| C(5)-H(5C)       | 0.9600     |
| C(6)-H(6A)       | 0.9600     |
| C(6)-H(6B)       | 0.9600     |
| C(6)-H(6C)       | 0.9600     |
| C(8)-C(10)       | 1.493(3)   |
| C(8)-C(9)        | 1.496(3)   |
| C(8)-H(8)        | 0.9800     |
| C(9)-H(9A)       | 0.9600     |
| C(9)-H(9B)       | 0.9600     |
| C(9)-H(9C)       | 0.9600     |
| C(10)-H(10A)     | 0.9600     |
| C(10)-H(10B)     | 0.9600     |
| C(10)-H(10C)     | 0.9600     |
| C(11)-C(16)      | 1.381(3)   |
| C(11)-C(12)      | 1.394(3)   |
| C(12)-C(13)      | 1.376(3)   |
| C(12)-H(12)      | 0.9300     |
| C(13)-C(14)      | 1.368(3)   |
| C(13)-H(13)      | 0.9300     |
| C(14)-C(15)      | 1.373(3)   |
| C(15)-C(16)      | 1.374(3)   |
| C(15)-H(15)      | 0.9300     |
| C(16)-H(16)      | 0.9300     |
|                  |            |
| C(1)-N(1)-N(2)   | 118.15(15) |
| N(1)-N(2)-C(7)   | 112.27(14) |
| N(1)-N(2)-C(3)   | 120.46(15) |
| C(7)-N(2)-C(3)   | 125.02(16) |
| C(3)-O(2)-C(4)   | 117.08(16) |
| C(7)-O(4)-C(8)   | 116.81(15) |
| N(1)-C(1)-C(2)   | 122.88(17) |
| N(1)-C(1)-C(11)  | 120.18(16) |
| C(2)-C(1)-C(11)  | 116.72(16) |
| N(3)-C(2)-C(1)   | 176.2(2)   |
| O(1)-C(3)-O(2)   | 128.42(19) |
| O(1)-C(3)-N(2)   | 121.52(18) |
| O(2)-C(3)-N(2)   | 110.01(17) |
| O(2)-C(4)-C(6)   | 107.82(17) |
| O(2)-C(4)-C(5)   | 106.03(18) |
| C(6)-C(4)-C(5)   | 113.7(2)   |
| O(2)-C(4)-H(4)   | 109.7      |
| C(6)-C(4)-H(4)   | 109.7      |
| C(5)-C(4)-H(4)   | 109.7      |
| C(4)-C(5)-H(5A)  | 109.5      |
| C(4)-C(5)-H(5B)  | 109.5      |
| H(5A)-C(5)-H(5B) | 109.5      |
| C(4)-C(5)-H(5C)  | 109.5      |
| H(5A)-C(5)-H(5C) | 109.5      |
| H(5B)-C(5)-H(5C) | 109.5      |

|                     |            |
|---------------------|------------|
| C(4)-C(6)-H(6A)     | 109.5      |
| C(4)-C(6)-H(6B)     | 109.5      |
| H(6A)-C(6)-H(6B)    | 109.5      |
| C(4)-C(6)-H(6C)     | 109.5      |
| H(6A)-C(6)-H(6C)    | 109.5      |
| H(6B)-C(6)-H(6C)    | 109.5      |
| O(3)-C(7)-O(4)      | 127.04(18) |
| O(3)-C(7)-N(2)      | 121.69(18) |
| O(4)-C(7)-N(2)      | 111.25(17) |
| O(4)-C(8)-C(10)     | 105.55(18) |
| O(4)-C(8)-C(9)      | 108.60(18) |
| C(10)-C(8)-C(9)     | 114.0(2)   |
| O(4)-C(8)-H(8)      | 109.5      |
| C(10)-C(8)-H(8)     | 109.5      |
| C(9)-C(8)-H(8)      | 109.5      |
| C(8)-C(9)-H(9A)     | 109.5      |
| C(8)-C(9)-H(9B)     | 109.5      |
| H(9A)-C(9)-H(9B)    | 109.5      |
| C(8)-C(9)-H(9C)     | 109.5      |
| H(9A)-C(9)-H(9C)    | 109.5      |
| H(9B)-C(9)-H(9C)    | 109.5      |
| C(8)-C(10)-H(10A)   | 109.5      |
| C(8)-C(10)-H(10B)   | 109.5      |
| H(10A)-C(10)-H(10B) | 109.5      |
| C(8)-C(10)-H(10C)   | 109.5      |
| H(10A)-C(10)-H(10C) | 109.5      |
| H(10B)-C(10)-H(10C) | 109.5      |
| C(16)-C(11)-C(12)   | 118.86(18) |
| C(16)-C(11)-C(1)    | 121.01(17) |
| C(12)-C(11)-C(1)    | 120.10(17) |
| C(13)-C(12)-C(11)   | 120.53(19) |
| C(13)-C(12)-H(12)   | 119.7      |
| C(11)-C(12)-H(12)   | 119.7      |
| C(14)-C(13)-C(12)   | 119.18(19) |
| C(14)-C(13)-H(13)   | 120.4      |
| C(12)-C(13)-H(13)   | 120.4      |
| C(13)-C(14)-C(15)   | 121.41(19) |
| C(13)-C(14)-C1(1)   | 120.10(17) |
| C(15)-C(14)-C1(1)   | 118.49(18) |
| C(14)-C(15)-C(16)   | 119.3(2)   |
| C(14)-C(15)-H(15)   | 120.3      |
| C(16)-C(15)-H(15)   | 120.3      |
| C(15)-C(16)-C(11)   | 120.67(18) |
| C(15)-C(16)-H(16)   | 119.7      |
| C(11)-C(16)-H(16)   | 119.7      |

---

Symmetry transformations used to generate equivalent atoms:



Table 4. Anisotropic displacement parameters ( $\text{Å}^2 \times 10^3$ ) for cd28573.  
 The anisotropic displacement factor exponent takes the form:  
 $-2 \pi^2 [ h^2 a^{*2} U_{11} + \dots + 2 h k a^* b^* U_{12} ]$

|       | U11   | U22    | U33    | U23    | U13   | U12    |
|-------|-------|--------|--------|--------|-------|--------|
| Cl(1) | 87(1) | 101(1) | 71(1)  | -34(1) | 26(1) | 10(1)  |
| N(1)  | 48(1) | 47(1)  | 48(1)  | -10(1) | 15(1) | -6(1)  |
| N(2)  | 42(1) | 48(1)  | 45(1)  | -12(1) | 12(1) | -6(1)  |
| N(3)  | 69(1) | 60(1)  | 82(2)  | -4(1)  | 33(1) | -14(1) |
| O(1)  | 54(1) | 63(1)  | 41(1)  | 1(1)   | 6(1)  | 8(1)   |
| O(2)  | 42(1) | 69(1)  | 40(1)  | -1(1)  | 13(1) | -2(1)  |
| O(3)  | 44(1) | 69(1)  | 63(1)  | -12(1) | 8(1)  | 5(1)   |
| O(4)  | 47(1) | 48(1)  | 47(1)  | -10(1) | 1(1)  | 2(1)   |
| C(1)  | 39(1) | 42(1)  | 41(1)  | 1(1)   | 8(1)  | -2(1)  |
| C(2)  | 49(1) | 42(1)  | 49(1)  | -5(1)  | 12(1) | -3(1)  |
| C(3)  | 49(1) | 39(1)  | 39(1)  | 1(1)   | 11(1) | -2(1)  |
| C(4)  | 45(1) | 69(2)  | 52(1)  | 6(1)   | 16(1) | 6(1)   |
| C(5)  | 84(2) | 100(2) | 92(2)  | -22(2) | 47(2) | -1(2)  |
| C(6)  | 55(1) | 91(2)  | 106(2) | 3(2)   | 22(1) | -14(1) |
| C(7)  | 48(1) | 43(1)  | 41(1)  | -1(1)  | 11(1) | -2(1)  |
| C(8)  | 48(1) | 59(1)  | 45(1)  | -13(1) | 5(1)  | -9(1)  |
| C(9)  | 86(2) | 88(2)  | 50(2)  | 1(1)   | 11(1) | 3(1)   |
| C(10) | 91(2) | 58(2)  | 82(2)  | -24(1) | -2(2) | -3(1)  |
| C(11) | 38(1) | 42(1)  | 39(1)  | -2(1)  | 5(1)  | 0(1)   |
| C(12) | 49(1) | 52(1)  | 55(1)  | -9(1)  | 14(1) | -10(1) |
| C(13) | 50(1) | 73(2)  | 52(1)  | -7(1)  | 19(1) | -4(1)  |
| C(14) | 48(1) | 67(2)  | 43(1)  | -11(1) | 6(1)  | 11(1)  |
| C(15) | 57(1) | 48(1)  | 55(1)  | -10(1) | 7(1)  | -1(1)  |
| C(16) | 50(1) | 46(1)  | 48(1)  | -2(1)  | 10(1) | -4(1)  |

Table 5. Hydrogen coordinates ( $\times 10^4$ ) and isotropic displacement parameters ( $\text{\AA}^2 \times 10^3$ ) for cd28573.

|        | x    | y     | z     | U(eq) |
|--------|------|-------|-------|-------|
| H(4)   | 6028 | 1703  | 8914  | 65    |
| H(5A)  | 5184 | -242  | 8174  | 132   |
| H(5B)  | 6512 | 560   | 8107  | 132   |
| H(5C)  | 5293 | 1649  | 7801  | 132   |
| H(6A)  | 6073 | 5083  | 8222  | 125   |
| H(6B)  | 7285 | 4008  | 8538  | 125   |
| H(6C)  | 6389 | 5230  | 8842  | 125   |
| H(8)   | 551  | 187   | 7947  | 61    |
| H(9A)  | 1303 | 2864  | 7490  | 112   |
| H(9B)  | 1113 | 888   | 7128  | 112   |
| H(9C)  | 2467 | 1519  | 7419  | 112   |
| H(10A) | 2772 | -2014 | 7902  | 119   |
| H(10B) | 1464 | -2633 | 7562  | 119   |
| H(10C) | 1687 | -2772 | 8182  | 119   |
| H(12)  | 1100 | 5557  | 10094 | 62    |
| H(13)  | 254  | 7525  | 10690 | 68    |
| H(15)  | 2478 | 12269 | 10469 | 64    |
| H(16)  | 3344 | 10300 | 9880  | 58    |

Table 6. Torsion angles [deg] for cd28573.

|                         |             |
|-------------------------|-------------|
| C(1)-N(1)-N(2)-C(7)     | -147.01(18) |
| C(1)-N(1)-N(2)-C(3)     | 49.2(3)     |
| N(2)-N(1)-C(1)-C(2)     | 4.6(3)      |
| N(2)-N(1)-C(1)-C(11)    | 179.14(16)  |
| N(1)-C(1)-C(2)-N(3)     | 72(3)       |
| C(11)-C(1)-C(2)-N(3)    | -102(3)     |
| C(4)-O(2)-C(3)-O(1)     | 5.5(3)      |
| C(4)-O(2)-C(3)-N(2)     | -177.35(15) |
| N(1)-N(2)-C(3)-O(1)     | 22.0(3)     |
| C(7)-N(2)-C(3)-O(1)     | -139.6(2)   |
| N(1)-N(2)-C(3)-O(2)     | -155.42(16) |
| C(7)-N(2)-C(3)-O(2)     | 43.0(2)     |
| C(3)-O(2)-C(4)-C(6)     | -93.7(2)    |
| C(3)-O(2)-C(4)-C(5)     | 144.11(19)  |
| C(8)-O(4)-C(7)-O(3)     | 16.5(3)     |
| C(8)-O(4)-C(7)-N(2)     | -164.79(15) |
| N(1)-N(2)-C(7)-O(3)     | 27.6(3)     |
| C(3)-N(2)-C(7)-O(3)     | -169.49(18) |
| N(1)-N(2)-C(7)-O(4)     | -151.18(16) |
| C(3)-N(2)-C(7)-O(4)     | 11.7(3)     |
| C(7)-O(4)-C(8)-C(10)    | -161.01(18) |
| C(7)-O(4)-C(8)-C(9)     | 76.3(2)     |
| N(1)-C(1)-C(11)-C(16)   | -166.44(18) |
| C(2)-C(1)-C(11)-C(16)   | 8.4(3)      |
| N(1)-C(1)-C(11)-C(12)   | 11.8(3)     |
| C(2)-C(1)-C(11)-C(12)   | -173.34(18) |
| C(16)-C(11)-C(12)-C(13) | 1.3(3)      |
| C(1)-C(11)-C(12)-C(13)  | -176.95(19) |
| C(11)-C(12)-C(13)-C(14) | -0.2(3)     |
| C(12)-C(13)-C(14)-C(15) | -0.6(3)     |
| C(12)-C(13)-C(14)-C1(1) | 179.55(17)  |
| C(13)-C(14)-C(15)-C(16) | 0.2(3)      |
| C1(1)-C(14)-C(15)-C(16) | -179.95(16) |
| C(14)-C(15)-C(16)-C(11) | 1.0(3)      |
| C(12)-C(11)-C(16)-C(15) | -1.8(3)     |
| C(1)-C(11)-C(16)-C(15)  | 176.52(18)  |

Symmetry transformations used to generate equivalent atoms:

Table 7. Hydrogen bonds for cd28573 [A and deg.] .

---

| D-H...A | d(D-H) | d(H...A) | d(D...A) | <(DHA) |
|---------|--------|----------|----------|--------|
|---------|--------|----------|----------|--------|

X-ray crystal structure compound **4g**

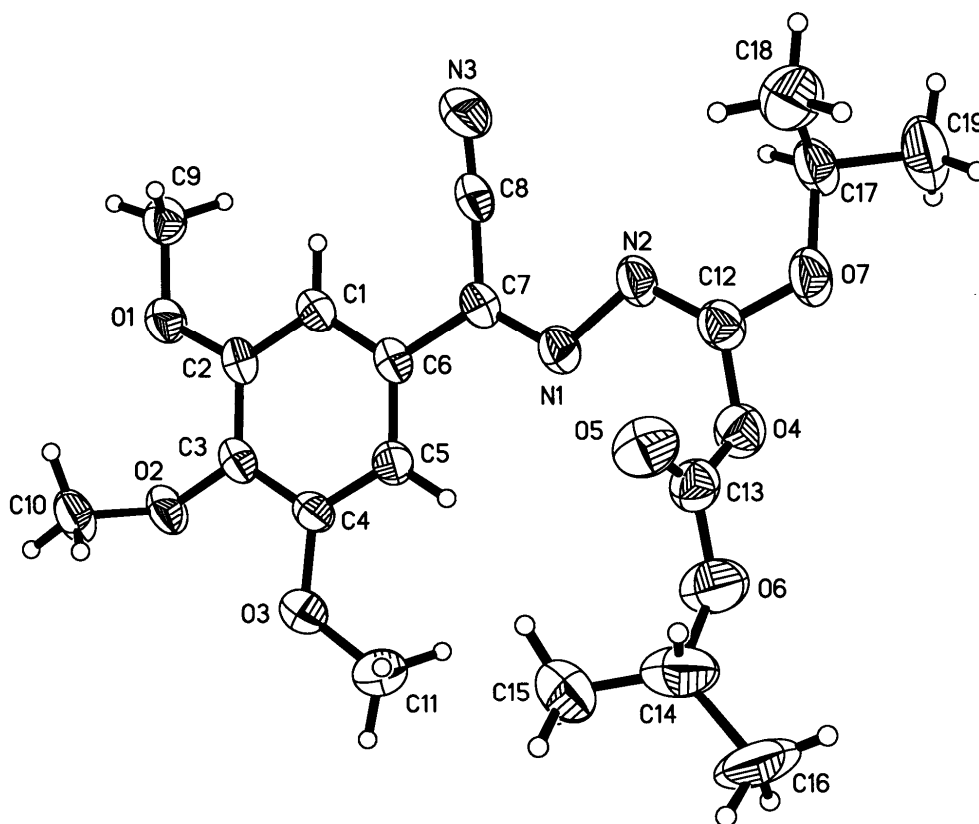

The crystal data of **4g** have been deposited in CCDC with number 724590. Empirical Formula:  $C_{19}H_{25}N_3O_7$ ; Formula Weight: 407.42; Crystal Color, Habit: colorless, prismatic; Crystal System: Triclinic; Lattice Type: Primitive; Unit cell dimension: 0.450 x 0.423 x 0.351 mm; Lattice Parameters:  $a = 7.5749(13)\text{\AA}$ ,  $b = 12.355(2)\text{\AA}$ ,  $c = 12.896(2)\text{\AA}$ ,  $\alpha = 99.071(3)^\circ$ ,  $\beta = 102.604(3)^\circ$ ,  $\gamma = 106.451(3)^\circ$ ,  $V = 1098.1(3)\text{\AA}^3$ ; Space group: P-1;  $Z = 2$ ;  $D_{calc} = 1.232\text{ g/cm}^3$ ;  $F_{000} = 432$ ; Diffractometer: Rigaku AFC7R; Residuals: R;  $R_w = 0.0579, 0.1325$ .

Table 1. Crystal data and structure refinement for cd29130.

|                                   |                                                                                                                                       |
|-----------------------------------|---------------------------------------------------------------------------------------------------------------------------------------|
| Identification code               | cd29130                                                                                                                               |
| Empirical formula                 | C19 H25 N3 O7                                                                                                                         |
| Formula weight                    | 407.42                                                                                                                                |
| Temperature                       | 293(2) K                                                                                                                              |
| Wavelength                        | 0.71073 Å                                                                                                                             |
| Crystal system, space group       | Triclinic, P-1                                                                                                                        |
| Unit cell dimensions              | a = 7.5749(13) Å    alpha = 99.071(3) deg.<br>b = 12.355(2) Å    beta = 102.604(3) deg.<br>c = 12.896(2) Å    gamma = 106.451(3) deg. |
| Volume                            | 1098.1(3) Å <sup>3</sup>                                                                                                              |
| Z, Calculated density             | 2, 1.232 Mg/m <sup>3</sup>                                                                                                            |
| Absorption coefficient            | 0.095 mm <sup>-1</sup>                                                                                                                |
| F(000)                            | 432                                                                                                                                   |
| Crystal size                      | 0.450 x 0.423 x 0.351 mm                                                                                                              |
| Theta range for data collection   | 1.66 to 26.00 deg.                                                                                                                    |
| Limiting indices                  | -8<=h<=9, -14<=k<=15, -15<=l<=15                                                                                                      |
| Reflections collected / unique    | 6074 / 4247 [R(int) = 0.1019]                                                                                                         |
| Completeness to theta = 26.00     | 98.2 %                                                                                                                                |
| Absorption correction             | Empirical                                                                                                                             |
| Max. and min. transmission        | 1.0000 and 0.7488                                                                                                                     |
| Refinement method                 | Full-matrix least-squares on F <sup>2</sup>                                                                                           |
| Data / restraints / parameters    | 4247 / 2 / 291                                                                                                                        |
| Goodness-of-fit on F <sup>2</sup> | 0.850                                                                                                                                 |
| Final R indices [I>2sigma(I)]     | R1 = 0.0579, wR2 = 0.1325                                                                                                             |
| R indices (all data)              | R1 = 0.1196, wR2 = 0.1559                                                                                                             |
| Extinction coefficient            | 0.011(2)                                                                                                                              |
| Largest diff. peak and hole       | 0.250 and -0.163 e.Å <sup>-3</sup>                                                                                                    |

Table 2. Atomic coordinates ( $\times 10^4$ ) and equivalent isotropic displacement parameters ( $\text{\AA}^2 \times 10^3$ ) for cd29130. U(eq) is defined as one third of the trace of the orthogonalized  $U_{ij}$  tensor.

|        | x          | y          | z         | U(eq)    |
|--------|------------|------------|-----------|----------|
| O(1)   | 125 (3)    | 4270 (2)   | 1764 (1)  | 72 (1)   |
| O(2)   | -2989 (2)  | 4914 (2)   | 1216 (1)  | 74 (1)   |
| O(3)   | -3744 (3)  | 6398 (2)   | 2599 (2)  | 78 (1)   |
| O(4)   | 900 (3)    | 8620 (2)   | 7862 (2)  | 80 (1)   |
| O(5)   | 2172 (3)   | 9946 (2)   | 6997 (2)  | 96 (1)   |
| O(6)   | -775 (3)   | 9607 (2)   | 7222 (2)  | 111 (1)  |
| O(7)   | 3436 (3)   | 8554 (2)   | 9005 (2)  | 84 (1)   |
| N(1)   | 1529 (3)   | 7340 (2)   | 6215 (2)  | 65 (1)   |
| N(2)   | 2875 (3)   | 7622 (2)   | 7229 (2)  | 66 (1)   |
| N(3)   | 4993 (4)   | 6139 (3)   | 5893 (2)  | 119 (1)  |
| C(1)   | 1074 (3)   | 5474 (2)   | 3610 (2)  | 57 (1)   |
| C(2)   | -122 (4)   | 5045 (2)   | 2553 (2)  | 57 (1)   |
| C(3)   | -1734 (4)  | 5370 (2)   | 2243 (2)  | 59 (1)   |
| C(4)   | -2142 (3)  | 6136 (2)   | 2997 (2)  | 58 (1)   |
| C(5)   | -961 (3)   | 6562 (2)   | 4053 (2)  | 59 (1)   |
| C(6)   | 657 (3)    | 6242 (2)   | 4353 (2)  | 53 (1)   |
| C(7)   | 1922 (3)   | 6689 (2)   | 5483 (2)  | 55 (1)   |
| C(8)   | 3633 (5)   | 6381 (3)   | 5738 (2)  | 72 (1)   |
| C(9)   | 1745 (4)   | 3901 (2)   | 2045 (2)  | 76 (1)   |
| C(10)  | -2379 (4)  | 5406 (3)   | 378 (2)   | 92 (1)   |
| C(11)  | -4244 (4)  | 7181 (3)   | 3321 (3)  | 89 (1)   |
| C(12)  | 2484 (4)   | 8251 (3)   | 7973 (3)  | 71 (1)   |
| C(13)  | 895 (5)    | 9460 (3)   | 7315 (3)  | 73 (1)   |
| C(14)  | -1151 (6)  | 10518 (4)  | 6726 (5)  | 120 (1)  |
| C(15)  | -1690 (40) | 10119 (14) | 5555 (10) | 129 (8)  |
| C(16)  | -2090 (50) | 11250 (30) | 7250 (30) | 230 (20) |
| C(15') | -3140 (20) | 9982 (10)  | 5938 (13) | 218 (7)  |
| C(16') | -1210 (20) | 11341 (8)  | 7643 (13) | 160 (5)  |
| C(17)  | 4924 (5)   | 8049 (3)   | 9368 (2)  | 85 (1)   |
| C(18)  | 6785 (6)   | 8799 (3)   | 9303 (3)  | 120 (1)  |
| C(19)  | 4868 (6)   | 7963 (3)   | 10513 (3) | 128 (1)  |

Table 3. Bond lengths [Å] and angles [deg] for cd29130.

|                  |           |
|------------------|-----------|
| O(1)-C(2)        | 1.365(3)  |
| O(1)-C(9)        | 1.421(3)  |
| O(2)-C(3)        | 1.373(3)  |
| O(2)-C(10)       | 1.420(3)  |
| O(3)-C(4)        | 1.357(3)  |
| O(3)-C(11)       | 1.422(3)  |
| O(4)-C(13)       | 1.344(4)  |
| O(4)-C(12)       | 1.387(3)  |
| O(5)-C(13)       | 1.177(3)  |
| O(6)-C(13)       | 1.311(3)  |
| O(6)-C(14)       | 1.445(4)  |
| O(7)-C(12)       | 1.305(3)  |
| O(7)-C(17)       | 1.463(3)  |
| N(1)-C(7)        | 1.282(3)  |
| N(1)-N(2)        | 1.395(3)  |
| N(2)-C(12)       | 1.277(3)  |
| N(3)-C(8)        | 1.137(3)  |
| C(1)-C(2)        | 1.386(3)  |
| C(1)-C(6)        | 1.390(3)  |
| C(1)-H(1)        | 0.9300    |
| C(2)-C(3)        | 1.389(3)  |
| C(3)-C(4)        | 1.393(4)  |
| C(4)-C(5)        | 1.382(3)  |
| C(5)-C(6)        | 1.387(3)  |
| C(5)-H(5)        | 0.9300    |
| C(6)-C(7)        | 1.478(3)  |
| C(7)-C(8)        | 1.438(4)  |
| C(9)-H(9A)       | 0.9600    |
| C(9)-H(9B)       | 0.9600    |
| C(9)-H(9C)       | 0.9600    |
| C(10)-H(10A)     | 0.9600    |
| C(10)-H(10B)     | 0.9600    |
| C(10)-H(10C)     | 0.9600    |
| C(11)-H(11A)     | 0.9600    |
| C(11)-H(11B)     | 0.9600    |
| C(11)-H(11C)     | 0.9600    |
| C(14)-C(15)      | 1.439(12) |
| C(14)-C(16')     | 1.450(13) |
| C(14)-C(16)      | 1.47(3)   |
| C(14)-C(15')     | 1.515(11) |
| C(14)-H(14)      | 0.9800    |
| C(15)-H(15A)     | 0.9600    |
| C(15)-H(15B)     | 0.9600    |
| C(15)-H(15C)     | 0.9600    |
| C(16)-H(16A)     | 0.9600    |
| C(16)-H(16B)     | 0.9600    |
| C(16)-H(16C)     | 0.9600    |
| C(15')-H(15D)    | 0.9600    |
| C(15')-H(15E)    | 0.9600    |
| C(15')-H(15F)    | 0.9600    |
| C(16')-H(16D)    | 0.9600    |
| C(16')-H(16E)    | 0.9600    |
| C(16')-H(16F)    | 0.9600    |
| C(17)-C(18)      | 1.479(4)  |
| C(17)-C(19)      | 1.506(4)  |
| C(17)-H(17)      | 0.9800    |
| C(18)-H(18A)     | 0.9600    |
| C(18)-H(18B)     | 0.9600    |
| C(18)-H(18C)     | 0.9600    |
| C(19)-H(19A)     | 0.9600    |
| C(19)-H(19B)     | 0.9600    |
| C(19)-H(19C)     | 0.9600    |
| C(2)-O(1)-C(9)   | 117.4(2)  |
| C(3)-O(2)-C(10)  | 115.1(2)  |
| C(4)-O(3)-C(11)  | 117.7(2)  |
| C(13)-O(4)-C(12) | 116.2(2)  |
| C(13)-O(6)-C(14) | 118.9(3)  |



|                     |           |
|---------------------|-----------|
| C(12)-O(7)-C(17)    | 118.5(2)  |
| C(7)-N(1)-N(2)      | 111.8(2)  |
| C(12)-N(2)-N(1)     | 112.7(2)  |
| C(2)-C(1)-C(6)      | 119.4(2)  |
| C(2)-C(1)-H(1)      | 120.3     |
| C(6)-C(1)-H(1)      | 120.3     |
| O(1)-C(2)-C(1)      | 124.5(2)  |
| O(1)-C(2)-C(3)      | 115.3(2)  |
| C(1)-C(2)-C(3)      | 120.2(3)  |
| O(2)-C(3)-C(2)      | 121.2(3)  |
| O(2)-C(3)-C(4)      | 118.9(2)  |
| C(2)-C(3)-C(4)      | 119.8(2)  |
| O(3)-C(4)-C(5)      | 125.2(3)  |
| O(3)-C(4)-C(3)      | 114.6(2)  |
| C(5)-C(4)-C(3)      | 120.2(2)  |
| C(4)-C(5)-C(6)      | 119.6(3)  |
| C(4)-C(5)-H(5)      | 120.2     |
| C(6)-C(5)-H(5)      | 120.2     |
| C(5)-C(6)-C(1)      | 120.7(2)  |
| C(5)-C(6)-C(7)      | 119.9(2)  |
| C(1)-C(6)-C(7)      | 119.4(2)  |
| N(1)-C(7)-C(8)      | 120.7(2)  |
| N(1)-C(7)-C(6)      | 121.6(2)  |
| C(8)-C(7)-C(6)      | 117.8(2)  |
| N(3)-C(8)-C(7)      | 176.8(3)  |
| O(1)-C(9)-H(9A)     | 109.5     |
| O(1)-C(9)-H(9B)     | 109.5     |
| H(9A)-C(9)-H(9B)    | 109.5     |
| O(1)-C(9)-H(9C)     | 109.5     |
| H(9A)-C(9)-H(9C)    | 109.5     |
| H(9B)-C(9)-H(9C)    | 109.5     |
| O(2)-C(10)-H(10A)   | 109.5     |
| O(2)-C(10)-H(10B)   | 109.5     |
| H(10A)-C(10)-H(10B) | 109.5     |
| O(2)-C(10)-H(10C)   | 109.5     |
| H(10A)-C(10)-H(10C) | 109.5     |
| H(10B)-C(10)-H(10C) | 109.5     |
| O(3)-C(11)-H(11A)   | 109.5     |
| O(3)-C(11)-H(11B)   | 109.5     |
| H(11A)-C(11)-H(11B) | 109.5     |
| O(3)-C(11)-H(11C)   | 109.5     |
| H(11A)-C(11)-H(11C) | 109.5     |
| H(11B)-C(11)-H(11C) | 109.5     |
| N(2)-C(12)-O(7)     | 124.5(3)  |
| N(2)-C(12)-O(4)     | 127.0(3)  |
| O(7)-C(12)-O(4)     | 108.2(3)  |
| O(5)-C(13)-O(6)     | 128.7(3)  |
| O(5)-C(13)-O(4)     | 125.0(3)  |
| O(6)-C(13)-O(4)     | 106.3(3)  |
| C(15)-C(14)-O(6)    | 109.2(7)  |
| C(15)-C(14)-C(16')  | 146.2(8)  |
| O(6)-C(14)-C(16')   | 102.6(6)  |
| C(15)-C(14)-C(16)   | 120.6(13) |
| O(6)-C(14)-C(16)    | 118.3(12) |
| C(16')-C(14)-C(16)  | 28.3(14)  |
| C(15)-C(14)-C(15')  | 51.4(7)   |
| O(6)-C(14)-C(15')   | 105.9(6)  |
| C(16')-C(14)-C(15') | 109.1(7)  |
| C(16)-C(14)-C(15')  | 81.8(13)  |
| C(15)-C(14)-H(14)   | 101.6     |
| O(6)-C(14)-H(14)    | 101.6     |
| C(16')-C(14)-H(14)  | 82.7      |
| C(16)-C(14)-H(14)   | 101.6     |
| C(15')-C(14)-H(14)  | 146.6     |
| C(14)-C(15)-H(15A)  | 109.5     |
| C(14)-C(15)-H(15B)  | 109.5     |
| C(14)-C(15)-H(15C)  | 109.5     |
| C(14)-C(16)-H(16A)  | 109.5     |
| C(14)-C(16)-H(16B)  | 109.5     |
| C(14)-C(16)-H(16C)  | 109.5     |
| C(14)-C(15')-H(15D) | 109.5     |
| C(14)-C(15')-H(15E) | 109.5     |

|                      |          |
|----------------------|----------|
| H(15D)-C(15')-H(15E) | 109.5    |
| C(14)-C(15')-H(15F)  | 109.5    |
| H(15D)-C(15')-H(15F) | 109.5    |
| H(15E)-C(15')-H(15F) | 109.5    |
| C(14)-C(16')-H(16D)  | 109.5    |
| C(14)-C(16')-H(16E)  | 109.5    |
| H(16D)-C(16')-H(16E) | 109.5    |
| C(14)-C(16')-H(16F)  | 109.5    |
| H(16D)-C(16')-H(16F) | 109.5    |
| H(16E)-C(16')-H(16F) | 109.5    |
| O(7)-C(17)-C(18)     | 109.6(3) |
| O(7)-C(17)-C(19)     | 103.9(3) |
| C(18)-C(17)-C(19)    | 113.8(3) |
| O(7)-C(17)-H(17)     | 109.8    |
| C(18)-C(17)-H(17)    | 109.8    |
| C(19)-C(17)-H(17)    | 109.8    |
| C(17)-C(18)-H(18A)   | 109.5    |
| C(17)-C(18)-H(18B)   | 109.5    |
| H(18A)-C(18)-H(18B)  | 109.5    |
| C(17)-C(18)-H(18C)   | 109.5    |
| H(18A)-C(18)-H(18C)  | 109.5    |
| H(18B)-C(18)-H(18C)  | 109.5    |
| C(17)-C(19)-H(19A)   | 109.5    |
| C(17)-C(19)-H(19B)   | 109.5    |
| H(19A)-C(19)-H(19B)  | 109.5    |
| C(17)-C(19)-H(19C)   | 109.5    |
| H(19A)-C(19)-H(19C)  | 109.5    |
| H(19B)-C(19)-H(19C)  | 109.5    |

---

Symmetry transformations used to generate equivalent atoms:

Table 4. Anisotropic displacement parameters ( $\text{\AA}^2 \times 10^3$ ) for cd29130.  
 The anisotropic displacement factor exponent takes the form:  
 $-2 \pi^2 [ h^2 a^{*2} U_{11} + \dots + 2 h k a^* b^* U_{12} ]$

|        | U11     | U22     | U33     | U23     | U13     | U12     |
|--------|---------|---------|---------|---------|---------|---------|
| O(1)   | 79(1)   | 81(1)   | 48(1)   | 4(1)    | 7(1)    | 32(1)   |
| O(2)   | 70(1)   | 90(1)   | 44(1)   | 11(1)   | -2(1)   | 14(1)   |
| O(3)   | 69(1)   | 95(2)   | 67(1)   | 18(1)   | 7(1)    | 34(1)   |
| O(4)   | 93(2)   | 81(1)   | 76(1)   | 28(1)   | 29(1)   | 33(1)   |
| O(5)   | 84(2)   | 89(2)   | 119(2)  | 33(1)   | 42(1)   | 21(1)   |
| O(6)   | 104(2)  | 130(2)  | 138(2)  | 61(2)   | 56(2)   | 64(2)   |
| O(7)   | 120(2)  | 77(1)   | 49(1)   | -3(1)   | 8(1)    | 44(1)   |
| N(1)   | 69(1)   | 66(2)   | 49(1)   | 6(1)    | 7(1)    | 18(1)   |
| N(2)   | 82(2)   | 66(2)   | 42(1)   | 3(1)    | 6(1)    | 25(1)   |
| N(3)   | 109(2)  | 177(3)  | 64(2)   | -7(2)   | -8(2)   | 82(2)   |
| C(1)   | 57(2)   | 62(2)   | 46(2)   | 17(1)   | 8(1)    | 16(1)   |
| C(2)   | 68(2)   | 56(2)   | 40(1)   | 10(1)   | 10(1)   | 14(1)   |
| C(3)   | 59(2)   | 65(2)   | 44(2)   | 16(1)   | 6(1)    | 10(1)   |
| C(4)   | 53(2)   | 67(2)   | 53(2)   | 20(1)   | 8(1)    | 19(1)   |
| C(5)   | 59(2)   | 65(2)   | 51(2)   | 14(1)   | 15(1)   | 18(1)   |
| C(6)   | 56(2)   | 53(2)   | 42(1)   | 12(1)   | 8(1)    | 7(1)    |
| C(7)   | 63(2)   | 51(2)   | 46(2)   | 14(1)   | 10(1)   | 14(1)   |
| C(8)   | 78(2)   | 91(2)   | 37(2)   | 2(1)    | 1(1)    | 30(2)   |
| C(9)   | 89(2)   | 79(2)   | 61(2)   | 11(2)   | 20(2)   | 35(2)   |
| C(10)  | 97(2)   | 125(3)  | 50(2)   | 30(2)   | 9(2)    | 37(2)   |
| C(11)  | 72(2)   | 106(3)  | 95(2)   | 24(2)   | 26(2)   | 39(2)   |
| C(12)  | 84(2)   | 63(2)   | 61(2)   | 9(2)    | 10(2)   | 28(2)   |
| C(13)  | 75(2)   | 71(2)   | 69(2)   | 6(2)    | 19(2)   | 24(2)   |
| C(14)  | 106(3)  | 130(4)  | 160(5)  | 66(4)   | 43(3)   | 71(3)   |
| C(15)  | 164(17) | 163(13) | 88(10)  | 49(9)   | 26(9)   | 90(12)  |
| C(16)  | 300(30) | 380(50) | 230(30) | 180(30) | 170(30) | 310(40) |
| C(15') | 222(14) | 270(12) | 158(10) | 8(9)    | -18(10) | 149(11) |
| C(16') | 225(12) | 78(6)   | 197(11) | 44(6)   | 58(10)  | 72(6)   |
| C(17)  | 127(3)  | 71(2)   | 50(2)   | 2(2)    | -1(2)   | 50(2)   |
| C(18)  | 128(3)  | 112(3)  | 116(3)  | 0(3)    | 25(3)   | 57(3)   |
| C(19)  | 202(4)  | 127(3)  | 60(2)   | 18(2)   | 21(2)   | 75(3)   |

Table 5. Hydrogen coordinates ( $\times 10^4$ ) and isotropic displacement parameters ( $\text{\AA}^2 \times 10^3$ ) for cd29130.

|        | x     | y     | z     | U (eq) |
|--------|-------|-------|-------|--------|
| H(1)   | 2146  | 5250  | 3821  | 68     |
| H(5)   | -1249 | 7061  | 4560  | 71     |
| H(9A)  | 2895  | 4551  | 2200  | 114    |
| H(9B)  | 1704  | 3316  | 1446  | 114    |
| H(9C)  | 1728  | 3586  | 2679  | 114    |
| H(10A) | -2236 | 6217  | 531   | 138    |
| H(10B) | -3315 | 5019  | -312  | 138    |
| H(10C) | -1173 | 5314  | 350   | 138    |
| H(11A) | -4310 | 6910  | 3973  | 133    |
| H(11B) | -5467 | 7226  | 2969  | 133    |
| H(11C) | -3291 | 7937  | 3506  | 133    |
| H(14)  | 146   | 11065 | 6871  | 144    |
| H(15A) | -2856 | 9472  | 5322  | 194    |
| H(15B) | -690  | 9884  | 5341  | 194    |
| H(15C) | -1871 | 10736 | 5223  | 194    |
| H(16A) | -2169 | 11851 | 6864  | 329    |
| H(16B) | -1357 | 11600 | 7994  | 329    |
| H(16C) | -3356 | 10786 | 7223  | 329    |
| H(15D) | -3116 | 9424  | 5336  | 327    |
| H(15E) | -3549 | 10578 | 5670  | 327    |
| H(15F) | -4015 | 9602  | 6309  | 327    |
| H(16D) | -2049 | 10940 | 8022  | 240    |
| H(16E) | -1676 | 11922 | 7381  | 240    |
| H(16F) | 55    | 11704 | 8133  | 240    |
| H(17)  | 4594  | 7271  | 8905  | 101    |
| H(18A) | 6709  | 8835  | 8557  | 179    |
| H(18B) | 7769  | 8484  | 9570  | 179    |
| H(18C) | 7083  | 9566  | 9741  | 179    |
| H(19A) | 5100  | 8720  | 10950 | 192    |
| H(19B) | 5836  | 7655  | 10824 | 192    |
| H(19C) | 3631  | 7458  | 10494 | 192    |

Table 6. Torsion angles [deg] for cd29130.

|                                      |            |
|--------------------------------------|------------|
| C(7)-N(1)-N(2)-C(12)                 | -178.6(2)  |
| C(9)-O(1)-C(2)-C(1)                  | -1.4(4)    |
| C(9)-O(1)-C(2)-C(3)                  | -179.3(2)  |
| C(6)-C(1)-C(2)-O(1)                  | -178.6(2)  |
| C(6)-C(1)-C(2)-C(3)                  | -0.8(4)    |
| C(10)-O(2)-C(3)-C(2)                 | -78.5(3)   |
| C(10)-O(2)-C(3)-C(4)                 | 104.2(3)   |
| O(1)-C(2)-C(3)-O(2)                  | 1.2(3)     |
| C(1)-C(2)-C(3)-O(2)                  | -176.8(2)  |
| O(1)-C(2)-C(3)-C(4)                  | 178.5(2)   |
| C(1)-C(2)-C(3)-C(4)                  | 0.4(4)     |
| C(11)-O(3)-C(4)-C(5)                 | 0.7(4)     |
| C(11)-O(3)-C(4)-C(3)                 | -179.6(2)  |
| O(2)-C(3)-C(4)-O(3)                  | -3.2(3)    |
| C(2)-C(3)-C(4)-O(3)                  | 179.5(2)   |
| O(2)-C(3)-C(4)-C(5)                  | 176.6(2)   |
| C(2)-C(3)-C(4)-C(5)                  | -0.7(4)    |
| O(3)-C(4)-C(5)-C(6)                  | -178.9(2)  |
| C(3)-C(4)-C(5)-C(6)                  | 1.4(4)     |
| C(4)-C(5)-C(6)-C(1)                  | -1.7(4)    |
| C(4)-C(5)-C(6)-C(7)                  | -179.6(2)  |
| C(2)-C(1)-C(6)-C(5)                  | 1.4(4)     |
| C(2)-C(1)-C(6)-C(7)                  | 179.3(2)   |
| N(2)-N(1)-C(7)-C(8)                  | -3.0(4)    |
| N(2)-N(1)-C(7)-C(6)                  | 177.7(2)   |
| C(5)-C(6)-C(7)-N(1)                  | 2.4(4)     |
| C(1)-C(6)-C(7)-N(1)                  | -175.5(2)  |
| C(5)-C(6)-C(7)-C(8)                  | -176.8(2)  |
| C(1)-C(6)-C(7)-C(8)                  | 5.2(3)     |
| N(1)-C(7)-C(8)-N(3)                  | -145(6)    |
| C(6)-C(7)-C(8)-N(3)                  | 35(6)      |
| N(1)-N(2)-C(12)-O(7)                 | 174.4(2)   |
| N(1)-N(2)-C(12)-O(4)                 | 1.9(4)     |
| C(17)-O(7)-C(12)-N(2)                | -6.8(5)    |
| C(17)-O(7)-C(12)-O(4)                | 166.9(2)   |
| C(13)-O(4)-C(12)-N(2)                | -73.4(4)   |
| C(13)-O(4)-C(12)-O(7)                | 113.1(3)   |
| C(14)-O(6)-C(13)-O(5)                | -3.9(5)    |
| C(14)-O(6)-C(13)-O(4)                | 176.0(3)   |
| C(12)-O(4)-C(13)-O(5)                | -5.4(4)    |
| C(12)-O(4)-C(13)-O(6)                | 174.7(2)   |
| C(13)-O(6)-C(14)-C(15)               | 81.0(12)   |
| C(13)-O(6)-C(14)-C(16 <sup>1</sup> ) | -110.8(7)  |
| C(13)-O(6)-C(14)-C(16)               | -135.9(18) |
| C(13)-O(6)-C(14)-C(15 <sup>1</sup> ) | 134.9(9)   |
| C(12)-O(7)-C(17)-C(18)               | 90.7(3)    |
| C(12)-O(7)-C(17)-C(19)               | -147.3(3)  |

Symmetry transformations used to generate equivalent atoms:

Table 7. Hydrogen bonds for cd29130 [Å and deg.].

---

| D-H...A | d(D-H) | d(H...A) | d(D...A) | <(DHA) |
|---------|--------|----------|----------|--------|
|---------|--------|----------|----------|--------|
